# Supplementary material for: High mobility group box 1 mediates inflammatory response of astrocytes via cyclooxygenase 2/prostaglandin E2 signaling following spinal cord injury
Source: PubMed Central journal article supplement — Neural Regen Res. 2021 Jan 25;16(9):1848–55. doi: 10.4103/1673-5374.303039 (PMC8328776; doi:10.4103/1673-5374.303039), 2021-01-25
Supplement: NRR-16-1848_Suppl1.pdf [file NRR-16-1848_Suppl1.pdf]

**Additional Table 1 The transcriptome profiles of rat injured spinal cord**

| gene id         | log2(fold change) | test id        | Transcript id     | locus                     | sample 1 | sample 2 | status | value 1 | value 2 | test stat | P value     |
|-----------------|-------------------|----------------|-------------------|---------------------------|----------|----------|--------|---------|---------|-----------|-------------|
| 1d vs. 0d       |                   |                |                   |                           |          |          |        |         |         |           |             |
| <i>Gdpd2</i>    | -4.68944          | TCONS_00087261 | NM_001106944      | chrX:71435126-71443913    | rn_0d    | rn_1d    | OK     | 3.71418 | 0.14395 | 2.20522   | 0.0274388   |
| <i>Gjb6</i>     | -4.46199          | TCONS_00030416 | NM_053388         | chr15:41248074-41284908   | rn_0d    | rn_1d    | OK     | 19.9234 | 0.90401 | 2.00124   | 0.0453667   |
| <i>Notum</i>    | -4.25264          | TCONS_00014603 | NM_001013975      | chr10:109425672-109432739 | rn_0d    | rn_1d    | OK     | 1.31044 | 0.06875 | 3.18192   | 0.00146301  |
| <i>Thrsp</i>    | -4.07618          | TCONS_00003518 | NM_012703         | chr1:168587723-168592048  | rn_0d    | rn_1d    | OK     | 30.4563 | 1.80561 | 5.35263   | 8.67E-08    |
| <i>Shisa3</i>   | -3.8793           | TCONS_00027403 | NM_001109087      | chr14:42012754-42018129   | rn_0d    | rn_1d    | OK     | 1.62692 | 0.11056 | 2.17907   | 0.0293268   |
| <i>Abcc8</i>    | -3.84274          | TCONS_00003209 | NM_013039         | chr1:103194418-103275525  | rn_0d    | rn_1d    | OK     | 3.84594 | 0.26806 | 2.02092   | 0.0432875   |
| <i>Acvr1c</i>   | -3.47102          | TCONS_00052838 | NM_139090         | chr3:49392011-49462621    | rn_0d    | rn_1d    | OK     | 0.54821 | 0.04944 | 2.55346   | 0.010666    |
| <i>Hmgcs2</i>   | -3.25966          | TCONS_00043425 | NM_173094         | chr2:219928568-219954863  | rn_0d    | rn_1d    | OK     | 6.49051 | 0.67768 | 3.88122   | 0.000103935 |
| <i>Slc25a18</i> | -3.14524          | TCONS_00058682 | NM_001044280      | chr4:220420190-220440659  | rn_0d    | rn_1d    | OK     | 31.1878 | 3.52512 | 4.07842   | 4.53E-05    |
| <i>Scn1a</i>    | -3.13859          | TCONS_00052898 | NM_030875         | chr3:59016640-59158748    | rn_0d    | rn_1d    | OK     | 13.7631 | 1.56281 | 2.11623   | 0.0343249   |
| <i>Fzd9</i>     | -3.12361          | TCONS_00021285 | NM_153305         | chr12:26471283-26473598   | rn_0d    | rn_1d    | OK     | 9.01853 | 1.03475 | 3.82908   | 0.000128623 |
| <i>Sfrp2</i>    | -3.12096          | TCONS_00043174 | NM_001100700      | chr2:202136232-202143778  | rn_0d    | rn_1d    | OK     | 1.95361 | 0.22456 | 2.42391   | 0.0153543   |
| <i>Ppp1r1b</i>  | -2.93038          | TCONS_00012840 | NM_138521         | chr10:86100810-86109852   | rn_0d    | rn_1d    | OK     | 26.8422 | 3.52116 | 4.02539   | 5.69E-05    |
| <i>RGD13103</i> | -2.877            | TCONS_00003403 | NM_001100581      | chr1:146836111-146860740  | rn_0d    | rn_1d    | OK     | 0.46878 | 0.06381 | 2.07902   | 0.0376159   |
| <i>Car7</i>     | -2.85675          | TCONS_00040522 | NM_001106165      | chr19:630355-639727       | rn_0d    | rn_1d    | OK     | 3.41542 | 0.4715  | 2.61534   | 0.00891392  |
| <i>Fibcd1</i>   | -2.84813          | TCONS_00051292 | NM_001107829      | chr3:14725660-14759373    | rn_0d    | rn_1d    | OK     | 0.82008 | 0.11389 | 2.98125   | 0.0028707   |
| <i>Fibcd1</i>   | -2.84813          | TCONS_00051302 | NM_001107829_dup1 | chr3:15357856-15391567    | rn_0d    | rn_1d    | OK     | 0.82008 | 0.11389 | 2.98125   | 0.0028707   |
| <i>Adra2c</i>   | -2.76086          | TCONS_00027540 | NM_138506         | chr14:81422129-81423833   | rn_0d    | rn_1d    | OK     | 5.74768 | 0.84799 | 3.0859    | 0.00202938  |
| <i>Kirrel3</i>  | -2.74631          | TCONS_00078197 | NM_001048215      | chr8:35722630-36273868    | rn_0d    | rn_1d    | OK     | 6.43176 | 0.95854 | 2.01441   | 0.0439661   |
| <i>Gabra1</i>   | -2.70774          | TCONS_00013508 | NM_183326         | chr10:27154443-27209873   | rn_0d    | rn_1d    | OK     | 10.049  | 1.5382  | 2.44111   | 0.014642    |
| <i>Slc7a10</i>  | -2.69044          | TCONS_00000721 | NM_053726         | chr1:92563399-92593301    | rn_0d    | rn_1d    | OK     | 31.5179 | 4.88263 | 2.31429   | 0.0206516   |
| <i>Tril</i>     | -2.60645          | TCONS_00059268 | NM_001034010      | chr4:148629982-148636622  | rn_0d    | rn_1d    | OK     | 42.1827 | 6.9265  | 3.69307   | 0.000221562 |
| <i>Htr2c</i>    | -2.58633          | TCONS_00087445 | NM_012765         | chrX:118225691-118460831  | rn_0d    | rn_1d    | OK     | 25.8291 | 4.30076 | 2.70705   | 0.00678841  |
| <i>Nmur2</i>    | -2.58269          | TCONS_00013625 | NM_022275         | chr10:41219612-41235469   | rn_0d    | rn_1d    | OK     | 2.13618 | 0.35659 | 2.26451   | 0.023543    |
| <i>Neurod6</i>  | -2.56502          | TCONS_00059282 | NM_001109237      | chr4:150564265-150567512  | rn_0d    | rn_1d    | OK     | 2.46368 | 0.41633 | 2.80726   | 0.00499653  |
| <i>Slc22a3</i>  | -2.42031          | TCONS_00002517 | NM_019230         | chr1:51234469-51321364    | rn_0d    | rn_1d    | OK     | 0.43076 | 0.08047 | 2.21589   | 0.0266988   |
| <i>Sult1a1</i>  | -2.41189          | TCONS_00003894 | NM_031834         | chr1:205079584-205083147  | rn_0d    | rn_1d    | OK     | 13.4667 | 2.53052 | 2.71252   | 0.00667728  |
| <i>Cyt11</i>    | -2.40419          | TCONS_00027507 | NM_001134604      | chr14:77783864-77788875   | rn_0d    | rn_1d    | OK     | 2.21416 | 0.41829 | 2.62269   | 0.00872387  |
| <i>Cyp3a9</i>   | -2.35376          | TCONS_00021744 | NM_147206         | chr12:21132925-21173248   | rn_0d    | rn_1d    | OK     | 5.11167 | 1.00002 | 2.82125   | 0.00478369  |
| <i>Fam111a</i>  | -2.32306          | TCONS_00001975 | NM_001109163      | chr1:236163690-236179257  | rn_0d    | rn_1d    | OK     | 18.0441 | 3.60598 | 3.39568   | 0.000684576 |
| <i>Aifm3</i>    | -2.31226          | TCONS_00018952 | NM_001013977      | chr11:90415867-90432538   | rn_0d    | rn_1d    | OK     | 12.2303 | 2.46251 | 2.42373   | 0.015362    |
| <i>Tekt4</i>    | -2.30245          | TCONS_00011972 | NM_001013965      | chr10:14644897-14650074   | rn_0d    | rn_1d    | OK     | 1.4381  | 0.29153 | 2.33874   | 0.0193487   |
| <i>Ces5a</i>    | -2.28445          | TCONS_00040096 | NM_001012056      | chr19:23219489-23258836   | rn_0d    | rn_1d    | OK     | 0.73641 | 0.15116 | 2.08274   | 0.0372747   |
| <i>Slc15a2</i>  | -2.28271          | TCONS_00018774 | NM_031672         | chr11:70022983-70052074   | rn_0d    | rn_1d    | OK     | 22.44   | 4.61167 | 3.44038   | 0.000580906 |
| <i>Nog</i>      | -2.22121          | TCONS_00014112 | NM_012990         | chr10:76677611-76679239   | rn_0d    | rn_1d    | OK     | 4.09266 | 0.87771 | 2.50924   | 0.0120993   |
| <i>Mapk9</i>    | -2.1661           | TCONS_00012098 | NM_001270544      | chr10:35105632-35146138   | rn_0d    | rn_1d    | OK     | 33.3867 | 7.43898 | 2.09264   | 0.0363811   |
| <i>Slco1c1</i>  | -2.07434          | TCONS_00058857 | NM_053441         | chr4:239951725-239997944  | rn_0d    | rn_1d    | OK     | 30.5191 | 7.2466  | 3.13803   | 0.0017009   |
| <i>Slc38a3</i>  | -2.0542           | TCONS_00079884 | NM_145776         | chr8:115761371-115777514  | rn_0d    | rn_1d    | OK     | 27.5448 | 6.6323  | 2.49837   | 0.0124767   |
| <i>Adcyap1r</i> | -2.03985          | TCONS_00058294 | NM_001270582      | chr4:150314845-150365724  | rn_0d    | rn_1d    | OK     | 23.3032 | 5.66709 | 2.25144   | 0.0243578   |
| <i>Ecm1</i>     | 2.00168           | TCONS_00044457 | NM_053882         | chr2:217345267-217350462  | rn_0d    | rn_1d    | OK     | 3.69414 | 14.7938 | -2.49328  | 0.0126568   |
| <i>Zfp36</i>    | 2.00371           | TCONS_00000620 | NM_133290         | chr1:86595417-86597898    | rn_0d    | rn_1d    | OK     | 9.35327 | 37.5094 | -2.93232  | 0.00336442  |
| <i>D114</i>     | 2.01179           | TCONS_00051895 | NM_001107760      | chr3:117685737-117695786  | rn_0d    | rn_1d    | OK     | 1.29446 | 5.22032 | -2.41074  | 0.0159204   |

|                 |         |                |              |                          |       |       |    |         |         |          |             |
|-----------------|---------|----------------|--------------|--------------------------|-------|-------|----|---------|---------|----------|-------------|
| <i>Kif18a</i>   | 2.01333 | TCONS_00051818 | NM_001137642 | chr3:106967784-107028574 | rn Od | rn ld | OK | 0.38861 | 1.56887 | -2.29497 | 0.0217347   |
| <i>Fcr1s</i>    | 2.02846 | TCONS_00044323 | NM_001107702 | chr2:205998854-206009505 | rn Od | rn ld | OK | 0.43664 | 1.78136 | -2.25447 | 0.0241667   |
| <i>Gins1</i>    | 2.03044 | TCONS_00052169 | NM_001109207 | chr3:153056223-153077645 | rn Od | rn ld | OK | 1.64475 | 6.71931 | -2.36715 | 0.0179254   |
| <i>Shc1</i>     | 2.03387 | TCONS_00043263 | NM_001164060 | chr2:208159785-208171348 | rn Od | rn ld | OK | 3.21834 | 13.1791 | -2.08938 | 0.0366739   |
| <i>Btg2</i>     | 2.05126 | TCONS_00024512 | NM_017259    | chr13:55966298-55970058  | rn Od | rn ld | OK | 4.70443 | 19.4983 | -2.91456 | 0.00356195  |
| <i>Twf1</i>     | 2.05359 | TCONS_00074710 | NM_001008521 | chr7:135495108-135507102 | rn Od | rn ld | OK | 30.6145 | 127.092 | -3.26121 | 0.00110937  |
| <i>Mafk</i>     | 2.05706 | TCONS_00021713 | NM_145673    | chr12:18914794-18934997  | rn Od | rn ld | OK | 4.10575 | 17.0855 | -2.58347 | 0.00978115  |
| <i>Phlda1</i>   | 2.05954 | TCONS_00073159 | NM_017180    | chr7:54272089-54274294   | rn Od | rn ld | OK | 8.26159 | 34.4386 | -2.98556 | 0.00283057  |
| <i>Ppp1r15a</i> | 2.06446 | TCONS_00003183 | NM_133546    | chr1:102590676-102593814 | rn Od | rn ld | OK | 6.0444  | 25.2824 | -2.73924 | 0.00615815  |
| <i>Ril</i>      | 2.06748 | TCONS_00013603 | NM_017062    | chr10:39171367-39185480  | rn Od | rn ld | OK | 23.9384 | 100.339 | -3.27326 | 0.00106314  |
| <i>Ung</i>      | 2.07086 | TCONS_00022041 | NM_001013124 | chr12:50028791-50037127  | rn Od | rn ld | OK | 1.55877 | 6.54898 | -2.27879 | 0.0226793   |
| <i>Plac8</i>    | 2.07418 | TCONS_00026725 | NM_001108353 | chr14:10640285-10661811  | rn Od | rn ld | OK | 6.77208 | 28.5175 | -2.65036 | 0.00804061  |
| <i>Ub17</i>     | 2.07559 | TCONS_00078483 | NM_001004247 | chr8:62471861-62489306   | rn Od | rn ld | OK | 33.2242 | 140.045 | -2.86801 | 0.00413061  |
| <i>Klf4</i>     | 2.07585 | TCONS_00064458 | NM_053713    | chr5:76447553-76452404   | rn Od | rn ld | OK | 2.40992 | 10.1601 | -2.25155 | 0.0243509   |
| <i>Serpinb1</i> | 2.09699 | TCONS_00035201 | NM_001031642 | chr17:34795221-34803703  | rn Od | rn ld | OK | 13.6079 | 58.217  | -3.02289 | 0.00250374  |
| <i>FAM187A</i>  | 2.09797 | TCONS_00012952 | NM_001013861 | chr10:90761119-90762591  | rn Od | rn ld | OK | 1.83956 | 7.87525 | -2.53785 | 0.0111537   |
| <i>Tcf19</i>    | 2.09935 | TCONS_00048824 | NM_213561    | chr20:5831136-5833706    | rn Od | rn ld | OK | 2.38677 | 10.2277 | -2.49671 | 0.0125351   |
| <i>Kpna2</i>    | 2.10248 | TCONS_00014420 | NM_001270802 | chr10:94940855-94952938  | rn Od | rn ld | OK | 5.52058 | 23.708  | -2.14758 | 0.0317473   |
| <i>Ehbp111</i>  | 2.11402 | TCONS_00004234 | NM_001129997 | chr1:227997200-228017354 | rn Od | rn ld | OK | 1.63931 | 7.09651 | -2.48509 | 0.0129517   |
| <i>Rad51</i>    | 2.12377 | TCONS_00051890 | NM_001109204 | chr3:117468880-117493555 | rn Od | rn ld | OK | 2.15068 | 9.37333 | -2.76503 | 0.00569182  |
| <i>Cks1b</i>    | 2.12515 | TCONS_00044394 | NM_001135749 | chr2:208154732-208159494 | rn Od | rn ld | OK | 2.26321 | 9.87322 | -2.41249 | 0.015844    |
| <i>Nxt1</i>     | 2.12688 | TCONS_00052154 | NM_001106521 | chr3:149404216-149407139 | rn Od | rn ld | OK | 5.06026 | 22.1018 | -2.71981 | 0.00653204  |
| <i>Tgfb3</i>    | 2.12797 | TCONS_00070081 | NM_013174    | chr6:119222051-119244674 | rn Od | rn ld | OK | 2.49844 | 10.9208 | -2.17719 | 0.0294664   |
| <i>S100a4</i>   | 2.12882 | TCONS_00043304 | NM_012618    | chr2:209431372-209433679 | rn Od | rn ld | OK | 69.0026 | 301.79  | -3.39532 | 0.000685492 |
| <i>Ak2</i>      | 2.13222 | TCONS_00063807 | NM_001033967 | chr5:150910909-150929525 | rn Od | rn ld | OK | 6.15499 | 26.9829 | -2.59207 | 0.00954002  |
| <i>Itpkc</i>    | 2.13311 | TCONS_00002914 | NM_178094    | chr1:85229681-85254264   | rn Od | rn ld | OK | 2.11384 | 9.27263 | -2.47481 | 0.0133308   |
| <i>Rcan1</i>    | 2.13953 | TCONS_00019069 | NM_153724    | chr11:36145267-36224811  | rn Od | rn ld | OK | 7.11994 | 31.3718 | -2.15901 | 0.0308495   |
| <i>Tpm3</i>     | 2.1441  | TCONS_00043280 | NM_173111    | chr2:208862972-208884071 | rn Od | rn ld | OK | 36.9092 | 163.145 | -3.17536 | 0.00149649  |
| <i>Cd276</i>    | 2.14606 | TCONS_00079545 | NM_182824    | chr8:63090337-63120814   | rn Od | rn ld | OK | 3.95005 | 17.4837 | -2.61093 | 0.00902968  |
| <i>Epha2</i>    | 2.15643 | TCONS_00064011 | NM_001108977 | chr5:163558668-163586206 | rn Od | rn ld | OK | 0.88158 | 3.93019 | -2.42287 | 0.0153986   |
| <i>Mis18a</i>   | 2.1682  | TCONS_00019043 | NM_001127523 | chr11:34491727-34504737  | rn Od | rn ld | OK | 0.40829 | 1.83509 | -2.00011 | 0.0454879   |
| <i>Ets1</i>     | 2.17061 | TCONS_00078196 | NM_012555    | chr8:33798629-33921593   | rn Od | rn ld | OK | 3.9648  | 17.85   | -2.98318 | 0.00285266  |
| <i>Fcer1g</i>   | 2.17301 | TCONS_00024757 | NM_001131001 | chr13:94228758-94233480  | rn Od | rn ld | OK | 29.806  | 134.414 | -2.97471 | 0.00293268  |
| <i>Psmb9</i>    | 2.17693 | TCONS_00049353 | NM_012708    | chr20:6052971-6058393    | rn Od | rn ld | OK | 4.28793 | 19.3896 | -2.71843 | 0.00655918  |
| <i>Anxa7</i>    | 2.17848 | TCONS_00029724 | NM_130416    | chr15:8355755-8383587    | rn Od | rn ld | OK | 8.85362 | 40.0783 | -2.21601 | 0.0266909   |
| <i>Tlr4</i>     | 2.18798 | TCONS_00063445 | NM_019178    | chr5:86690619-86704810   | rn Od | rn ld | OK | 0.87172 | 3.97215 | -2.27647 | 0.022818    |
| <i>Tap1</i>     | 2.19242 | TCONS_00048833 | NM_032055    | chr20:6058570-6069222    | rn Od | rn ld | OK | 2.39369 | 10.9409 | -2.55168 | 0.0107206   |
| <i>Ifitm3</i>   | 2.19773 | TCONS_00004062 | NM_001136124 | chr1:220730714-220731913 | rn Od | rn ld | OK | 56.3497 | 258.508 | -3.16    | 0.0015777   |
| <i>Cd53</i>     | 2.1985  | TCONS_00044551 | NM_012523    | chr2:228956378-229004197 | rn Od | rn ld | OK | 8.08623 | 37.1161 | -3.03898 | 0.00237384  |
| <i>Ada</i>      | 2.20399 | TCONS_00053682 | NM_130399    | chr3:166305963-166330108 | rn Od | rn ld | OK | 1.52598 | 7.03099 | -2.52046 | 0.0117203   |
| <i>Myd88</i>    | 2.20653 | TCONS_00079988 | NM_198130    | chr8:127229272-127233342 | rn Od | rn ld | OK | 3.14407 | 14.5119 | -2.97737 | 0.00290735  |
| <i>F3</i>       | 2.21501 | TCONS_00043573 | NM_013057    | chr2:243348429-243360439 | rn Od | rn ld | OK | 7.50598 | 34.8492 | -2.98503 | 0.00283553  |
| <i>Ms1n</i>     | 2.2203  | TCONS_00013413 | NM_031658    | chr10:14932447-14938109  | rn Od | rn ld | OK | 0.49558 | 2.30936 | -2.50919 | 0.0121009   |
| <i>Smc2</i>     | 2.22197 | TCONS_00063376 | NM_001108666 | chr5:73152004-73198317   | rn Od | rn ld | OK | 1.76047 | 8.21311 | -2.39446 | 0.0166447   |
| <i>Lamc1</i>    | 2.22575 | TCONS_00024601 | NM_053966    | chr13:75622186-75749168  | rn Od | rn ld | OK | 8.41813 | 39.376  | -3.00156 | 0.00268598  |

|                 |          |                |                   |                           |       |       |    |          |          |           |              |
|-----------------|----------|----------------|-------------------|---------------------------|-------|-------|----|----------|----------|-----------|--------------|
| <i>S1fn2</i>    | 2. 22862 | TCONS_00012656 | NM_001107031      | chr10:70001018-70007628   | rn Od | rn_ld | OK | 4. 04423 | 18. 9548 | -2. 88708 | 0. 00388832  |
| <i>Ptprc</i>    | 2. 23944 | TCONS_00024555 | NM_001109890      | chr13:60094037-60205338   | rn Od | rn_ld | OK | 1. 57108 | 7. 41884 | -2. 69555 | 0. 00702719  |
| <i>Ctsz</i>     | 2. 24045 | TCONS_00053778 | NM_183330         | chr3:178565102-178585389  | rn Od | rn_ld | OK | 18. 54   | 87. 6099 | -2. 93829 | 0. 00330031  |
| <i>Tmpo</i>     | 2. 25115 | TCONS_00074079 | NM_012887         | chr7:31934358-31959415    | rn Od | rn_ld | OK | 3. 97796 | 18. 9375 | -2. 08281 | 0. 0372687   |
| <i>Gar1</i>     | 2. 26682 | TCONS_00042789 | NM_001024306      | chr2:74665989-74673503    | rn Od | rn_ld | OK | 2. 46702 | 11. 8728 | -2. 29276 | 0. 0218616   |
| <i>Klf10</i>    | 2. 2679  | TCONS_00074274 | NM_031135         | chr7:77258858-77265053    | rn Od | rn_ld | OK | 2. 372   | 11. 424  | -3. 08746 | 0. 00201877  |
| <i>Gbp2</i>     | 2. 26823 | TCONS_00043682 | NM_133624         | chr2:266805233-266821133  | rn Od | rn_ld | OK | 5. 43773 | 26. 1954 | -3. 3956  | 0. 000684793 |
| <i>I12rg</i>    | 2. 26832 | TCONS_00087854 | NM_080889         | chrX:72017854-72021565    | rn Od | rn_ld | OK | 0. 9788  | 4. 7155  | -2. 39931 | 0. 016426    |
| <i>Tnfrsf1a</i> | 2. 27595 | TCONS_00058764 | NM_013091         | chr4:224881444-224894088  | rn Od | rn_ld | OK | 9. 98853 | 48. 376  | -3. 48784 | 0. 000486941 |
| <i>RGD15657</i> | 2. 27599 | TCONS_00087209 | NM_001109318      | chrX:54590576-54609310    | rn Od | rn_ld | OK | 0. 39527 | 1. 91442 | -2. 41473 | 0. 0157467   |
| <i>Ck1f</i>     | 2. 27972 | TCONS_00040527 | NM_139111         | chr19:907065-915792       | rn Od | rn_ld | OK | 2. 45067 | 11. 9    | -2. 33906 | 0. 0193324   |
| <i>Spi1</i>     | 2. 27976 | TCONS_00051736 | NM_001005892      | chr3:86616013-86647050    | rn Od | rn_ld | OK | 2. 37079 | 11. 5125 | -2. 07719 | 0. 0377842   |
| <i>P1bd1</i>    | 2. 28062 | TCONS_00059783 | NM_001013927      | chr4:234823107-234880050  | rn Od | rn_ld | OK | 0. 45513 | 2. 2114  | -2. 40924 | 0. 0159856   |
| <i>Rbm3</i>     | 2. 28455 | TCONS_00087030 | NM_053696         | chrX:15882033-15888838    | rn Od | rn_ld | OK | 20. 8803 | 101. 732 | -2. 60783 | 0. 00911175  |
| <i>Hmgb2</i>    | 2. 28456 | TCONS_00033124 | NM_017187         | chr16:35886763-35889338   | rn Od | rn_ld | OK | 10. 0463 | 48. 9474 | -3. 32797 | 0. 000874804 |
| <i>Dusp6</i>    | 2. 2917  | TCONS_00073129 | NM_053883         | chr7:41506393-41510627    | rn Od | rn_ld | OK | 5. 5757  | 27. 3004 | -3. 32738 | 0. 000876666 |
| <i>My112a</i>   | 2. 29197 | TCONS_00084582 | NM_001135017      | chr9:118779615-118787301  | rn Od | rn_ld | OK | 44. 0513 | 215. 73  | -3. 77005 | 0. 000163213 |
| <i>Ier3</i>     | 2. 29309 | TCONS_00049337 | NM_212505         | chr20:5535615-5536820     | rn Od | rn_ld | OK | 8. 62817 | 42. 287  | -3. 13775 | 0. 00170251  |
| <i>Npw</i>      | 2. 29435 | TCONS_00013378 | NM_153294         | chr10:13838166-13839432   | rn Od | rn_ld | OK | 0. 47642 | 2. 33699 | -1. 98378 | 0. 0472803   |
| <i>Eng</i>      | 2. 29665 | TCONS_00051334 | NM_001010968      | chr3:17021562-17058548    | rn Od | rn_ld | OK | 11. 8633 | 58. 2862 | -3. 37215 | 0. 000745844 |
| <i>Chsy1</i>    | 2. 3016  | TCONS_00000939 | NM_001106268      | chr1:128095352-128156150  | rn Od | rn_ld | OK | 3. 18678 | 15. 711  | -2. 64461 | 0. 00817861  |
| <i>Cth</i>      | 2. 30962 | TCONS_00043743 | NM_017074         | chr2:282366097-282392112  | rn Od | rn_ld | OK | 1. 31741 | 6. 53109 | -2. 1777  | 0. 0294284   |
| <i>Cttnbp2n</i> | 2. 31188 | TCONS_00044541 | NM_001107712      | chr2:226917955-226964542  | rn Od | rn_ld | OK | 8. 50156 | 42. 2126 | -3. 60277 | 0. 000314846 |
| <i>Pdlim1</i>   | 2. 3137  | TCONS_00004532 | NM_017365         | chr1:266752409-266800887  | rn Od | rn_ld | OK | 3. 97152 | 19. 7447 | -2. 80606 | 0. 00501507  |
| <i>Ier5</i>     | 2. 33069 | TCONS_00024612 | NM_001025137      | chr13:77677759-77679852   | rn Od | rn_ld | OK | 4. 67679 | 23. 5263 | -3. 25645 | 0. 00112815  |
| <i>Gpx2</i>     | 2. 33441 | TCONS_00069989 | NM_183403         | chr6:109236419-109239718  | rn Od | rn_ld | OK | 11. 8886 | 59. 9593 | -3. 2515  | 0. 00114796  |
| <i>Mcm7</i>     | 2. 33628 | TCONS_00021746 | NM_001004203      | chr12:21364249-21371507   | rn Od | rn_ld | OK | 3. 58907 | 18. 1248 | -2. 64758 | 0. 00810695  |
| <i>Egr2</i>     | 2. 34388 | TCONS_00049573 | NM_053633         | chr20:24551934-24558476   | rn Od | rn_ld | OK | 1. 7658  | 8. 96433 | -2. 49911 | 0. 0124507   |
| <i>Cdca8</i>    | 2. 35046 | TCONS_00064833 | NM_001025050      | chr5:146680980-146700067  | rn Od | rn_ld | OK | 1. 43073 | 7. 29654 | -2. 80682 | 0. 00500328  |
| <i>Cmtm3</i>    | 2. 35081 | TCONS_00040524 | NM_001106164      | chr19:829210-836117       | rn Od | rn_ld | OK | 1. 97952 | 10. 0977 | -2. 66797 | 0. 00763103  |
| <i>Fhod1</i>    | 2. 36057 | TCONS_00040729 | NM_001191600      | chr19:48150420-48169238   | rn Od | rn_ld | OK | 0. 88874 | 4. 56431 | -2. 05119 | 0. 0402488   |
| <i>Vim</i>      | 2. 36486 | TCONS_00035419 | NM_031140         | chr17:82500658-82509383   | rn Od | rn_ld | OK | 101. 712 | 523. 92  | -3. 20507 | 0. 00135028  |
| <i>Cthrc1</i>   | 2. 37803 | TCONS_00074283 | NM_172333         | chr7:78271769-78282052    | rn Od | rn_ld | OK | 1. 01108 | 5. 25582 | -2. 64356 | 0. 00820395  |
| <i>Snail</i>    | 2. 38342 | TCONS_00052404 | NM_053805         | chr3:170425897-170430384  | rn Od | rn_ld | OK | 1. 17555 | 6. 13368 | -2. 79933 | 0. 00512083  |
| <i>Tgfb1</i>    | 2. 38861 | TCONS_00000575 | NM_021578         | chr1:83741412-83758472    | rn Od | rn_ld | OK | 4. 44053 | 23. 253  | -2. 68893 | 0. 00716818  |
| <i>Hs2st1</i>   | 2. 39341 | TCONS_00044726 | NM_001100518      | chr2:268995401-269129114  | rn Od | rn_ld | OK | 6. 61691 | 34. 765  | -2. 7872  | 0. 00531658  |
| <i>Trim47</i>   | 2. 4027  | TCONS_00013069 | NM_001109585      | chr10:103625733-103630791 | rn Od | rn_ld | OK | 2. 69674 | 14. 2601 | -2. 6428  | 0. 00822234  |
| <i>Lrrc32</i>   | 2. 41558 | TCONS_00001173 | NM_001170434      | chr1:169649229-169661088  | rn Od | rn_ld | OK | 2. 11915 | 11. 3064 | -3. 33681 | 0. 000847468 |
| <i>Col4a1</i>   | 2. 41716 | TCONS_00032843 | NM_001135009      | chr16:82987856-83097435   | rn Od | rn_ld | OK | 12. 316  | 65. 7823 | -3. 79881 | 0. 000145393 |
| <i>Klf6</i>     | 2. 41757 | TCONS_00035816 | NM_031642         | chr17:69624950-69633946   | rn Od | rn_ld | OK | 8. 28767 | 44. 2785 | -3. 59993 | 0. 0003183   |
| <i>Hells</i>    | 2. 41948 | TCONS_00002138 | NM_001106371      | chr1:265106338-265148860  | rn Od | rn_ld | OK | 0. 37765 | 2. 02032 | -2. 76158 | 0. 00575232  |
| <i>Hells</i>    | 2. 41948 | TCONS_00002139 | NM_001106371_dup1 | chr1:265357068-265399240  | rn Od | rn_ld | OK | 0. 37765 | 2. 02032 | -2. 76158 | 0. 00575232  |
| <i>Cyba</i>     | 2. 43337 | TCONS_00040881 | NM_024160         | chr19:65959817-65967224   | rn Od | rn_ld | OK | 10. 2439 | 55. 3328 | -3. 25336 | 0. 00114048  |
| <i>Batf</i>     | 2. 43623 | TCONS_00069309 | NM_001106748      | chr6:118868533-118890817  | rn Od | rn_ld | OK | 0. 4034  | 2. 1833  | -2. 41708 | 0. 0156456   |
| <i>Cldn4</i>    | 2. 44363 | TCONS_00021290 | NM_001012022      | chr12:26761479-26763277   | rn Od | rn_ld | OK | 1. 12473 | 6. 11863 | -2. 90394 | 0. 00368502  |

|                 |         |                |                   |                           |       |       |    |         |         |          |             |
|-----------------|---------|----------------|-------------------|---------------------------|-------|-------|----|---------|---------|----------|-------------|
| <i>Mt2A</i>     | 2.44572 | TCONS_00040585 | NM_001137564      | chr19:11283092-11283867   | rn Od | rn ld | OK | 104.506 | 569.343 | -3.80781 | 0.000140204 |
| <i>Ldha</i>     | 2.44578 | TCONS_00000859 | NM_017025         | chr1:103975208-103984632  | rn Od | rn ld | OK | 61.0005 | 332.343 | -4.14808 | 3.35E-05    |
| <i>Cd63</i>     | 2.45341 | TCONS_00072818 | NM_017125         | chr7:3303448-3305798      | rn Od | rn ld | OK | 132.001 | 722.977 | -4.16554 | 3.11E-05    |
| <i>Lmcd1</i>    | 2.46777 | TCONS_00058572 | NM_001008562      | chr4:207494639-207554220  | rn Od | rn ld | OK | 4.41153 | 24.4041 | -3.16821 | 0.0015338   |
| <i>Po1e</i>     | 2.46865 | TCONS_00022073 | NM_001107152      | chr12:54138481-54187417   | rn Od | rn ld | OK | 0.38489 | 2.13046 | -2.29354 | 0.0218171   |
| <i>Plek</i>     | 2.47981 | TCONS_00027130 | NM_001025750      | chr14:100353684-100386531 | rn Od | rn ld | OK | 3.32964 | 18.5735 | -3.01114 | 0.00260266  |
| <i>Flna</i>     | 2.48501 | TCONS_00001079 | NM_001134599      | chr1:152200912-152227391  | rn Od | rn ld | OK | 8.86476 | 49.6284 | -3.39162 | 0.000694796 |
| <i>Anxa2</i>    | 2.48548 | TCONS_00078619 | NM_019905         | chr8:80014389-80050845    | rn Od | rn ld | OK | 53.0304 | 296.981 | -4.21401 | 2.51E-05    |
| <i>Fam38a</i>   | 2.48718 | TCONS_00040887 | NM_001077200      | chr19:66009916-66075869   | rn Od | rn ld | OK | 1.31591 | 7.37802 | -2.46487 | 0.0137063   |
| <i>RGD15651</i> | 2.49194 | TCONS_00011863 | NM_001105762      | chr10:9325200-9334297     | rn Od | rn ld | OK | 0.65413 | 3.67972 | -2.79203 | 0.00523783  |
| <i>Bmp7</i>     | 2.49559 | TCONS_00053769 | NM_001191856      | chr3:176945361-177020745  | rn Od | rn ld | OK | 1.11595 | 6.29353 | -2.48289 | 0.0130321   |
| <i>Gadd45g</i>  | 2.50706 | TCONS_00035571 | NM_001077640      | chr17:15469296-15471042   | rn Od | rn ld | OK | 12.4602 | 70.8317 | -3.62286 | 0.000291361 |
| <i>Tes</i>      | 2.51144 | TCONS_00058010 | NM_001039344      | chr4:44929701-44968306    | rn Od | rn ld | OK | 3.16111 | 18.0244 | -3.12231 | 0.00179439  |
| <i>Parp3</i>    | 2.51689 | TCONS_00079861 | NM_001008328      | chr8:114535120-114543598  | rn Od | rn ld | OK | 2.65181 | 15.1776 | -2.89635 | 0.00377527  |
| <i>Tgm2</i>     | 2.52041 | TCONS_00052301 | NM_019386         | chr3:160977904-161007260  | rn Od | rn ld | OK | 13.5715 | 77.8656 | -4.16351 | 3.13E-05    |
| <i>Cdca7</i>    | 2.52108 | TCONS_00051550 | NM_001025693      | chr3:65630825-65641461    | rn Od | rn ld | OK | 0.84312 | 4.8396  | -3.06349 | 0.00218769  |
| <i>Jak3</i>     | 2.52283 | TCONS_00032543 | NM_012855         | chr16:19967319-19981129   | rn Od | rn ld | OK | 1.0205  | 5.86488 | -2.24248 | 0.0249303   |
| <i>Birc5</i>    | 2.52593 | TCONS_00013157 | NM_022274         | chr10:106494774-106503096 | rn Od | rn ld | OK | 1.47657 | 8.50426 | -2.91282 | 0.00358181  |
| <i>Hck</i>      | 2.53705 | TCONS_00052220 | NM_013185         | chr3:154982908-155025530  | rn Od | rn ld | OK | 1.86591 | 10.8298 | -3.29829 | 0.000972755 |
| <i>Rac2</i>     | 2.54962 | TCONS_00074515 | NM_001008384      | chr7:119772956-119786350  | rn Od | rn ld | OK | 3.15244 | 18.4569 | -2.91854 | 0.00351676  |
| <i>Ccnd1</i>    | 2.55125 | TCONS_00004147 | NM_171992         | chr1:224960135-224969658  | rn Od | rn ld | OK | 12.9404 | 75.8496 | -4.25784 | 2.06E-05    |
| <i>Gpr84</i>    | 2.55372 | TCONS_00074814 | NM_001109509      | chr7:142714631-142716944  | rn Od | rn ld | OK | 1.63982 | 9.62811 | -2.5708  | 0.0101463   |
| <i>Psmb8</i>    | 2.56468 | TCONS_00048834 | NM_080767         | chr20:6070356-6073320     | rn Od | rn ld | OK | 6.16179 | 36.4547 | -3.49145 | 0.000480398 |
| <i>Fcgr3a</i>   | 2.57241 | TCONS_00024187 | NM_207603         | chr13:94025029-94035170   | rn Od | rn ld | OK | 3.68212 | 21.9013 | -3.09672 | 0.00195672  |
| <i>Ncan</i>     | 2.57944 | TCONS_00032583 | NM_031653_dup1    | chr16:20900030-20926495   | rn Od | rn ld | OK | 5.71597 | 34.1649 | -4.17577 | 2.97E-05    |
| <i>Ncan</i>     | 2.58563 | TCONS_00032584 | NM_031653         | chr16:20964322-20989629   | rn Od | rn ld | OK | 5.71597 | 34.3118 | -4.18575 | 2.84E-05    |
| <i>Lrg1</i>     | 2.58601 | TCONS_00083278 | NM_001009717      | chr9:9939322-9941615      | rn Od | rn ld | OK | 5.38134 | 32.3114 | -3.10992 | 0.00187138  |
| <i>Cdt1</i>     | 2.596   | TCONS_00040450 | NM_001106192      | chr19:66090080-66095027   | rn Od | rn ld | OK | 0.86509 | 5.23039 | -2.73949 | 0.00615354  |
| <i>Mcm2</i>     | 2.60149 | TCONS_00059437 | NM_001107873      | chr4:186066379-186095215  | rn Od | rn ld | OK | 2.53038 | 15.3572 | -2.1186  | 0.0341247   |
| <i>Hbb-b1</i>   | 2.6095  | TCONS_00003641 | NM_198776         | chr1:175104277-175111738  | rn Od | rn ld | OK | 34.9011 | 212.999 | -3.95801 | 7.56E-05    |
| <i>Efemp2</i>   | 2.61485 | TCONS_00001832 | NM_001277341      | chr1:227783414-227790741  | rn Od | rn ld | OK | 4.59076 | 28.1211 | -2.65479 | 0.00793574  |
| <i>Il33</i>     | 2.61586 | TCONS_00002083 | NM_001014166      | chr1:255363598-255397661  | rn Od | rn ld | OK | 10.8883 | 66.7437 | -3.52227 | 0.000427873 |
| <i>LOC68487</i> | 2.62106 | TCONS_00032766 | NM_001115043      | chr16:72033795-72035089   | rn Od | rn ld | OK | 2.00608 | 12.3415 | -3.27509 | 0.00105628  |
| <i>LOC68487</i> | 2.62106 | TCONS_00032767 | NM_001115043_dup1 | chr16:72046930-72048224   | rn Od | rn ld | OK | 2.00608 | 12.3415 | -3.27509 | 0.00105628  |
| <i>LOC10036</i> | 2.62484 | TCONS_00004077 | NM_001270763      | chr1:221068625-221081346  | rn Od | rn ld | OK | 11.595  | 71.5198 | -2.62133 | 0.00875887  |
| <i>Angpt2</i>   | 2.6286  | TCONS_00032810 | NM_134454         | chr16:75509707-75715813   | rn Od | rn ld | OK | 1.55262 | 9.60176 | -1.97304 | 0.0484915   |
| <i>Dctd</i>     | 2.63178 | TCONS_00033138 | NM_001013882      | chr16:46903565-46933233   | rn Od | rn ld | OK | 1.01017 | 6.26096 | -1.99702 | 0.045823    |
| <i>Des</i>      | 2.63441 | TCONS_00083742 | NM_022531         | chr9:82325842-82333548    | rn Od | rn ld | OK | 3.85135 | 23.9139 | -3.33485 | 0.000853451 |
| <i>Thbd</i>     | 2.64617 | TCONS_00053510 | NM_031771         | chr3:149159894-149163547  | rn Od | rn ld | OK | 4.77053 | 29.8637 | -3.98847 | 6.65E-05    |
| <i>Mboat1</i>   | 2.65167 | TCONS_00035679 | NM_001109120      | chr17:37374237-37486374   | rn Od | rn ld | OK | 1.01858 | 6.40068 | -2.30112 | 0.0213848   |
| <i>Cxc116</i>   | 2.6594  | TCONS_00013852 | NM_001017478      | chr10:56817241-56840312   | rn Od | rn ld | OK | 3.2611  | 20.6027 | -2.93038 | 0.00338549  |
| <i>Mt1a</i>     | 2.65952 | TCONS_00040584 | NM_138826         | chr19:11277132-11278149   | rn Od | rn ld | OK | 31.2388 | 197.374 | -3.65016 | 0.000262077 |
| <i>Ier2</i>     | 2.66514 | TCONS_00040677 | NM_001009541      | chr19:36750510-36752033   | rn Od | rn ld | OK | 4.88108 | 30.9602 | -3.66064 | 0.000251585 |
| <i>Bdkrb2</i>   | 2.66628 | TCONS_00069404 | NM_173100         | chr6:138607198-138631275  | rn Od | rn ld | OK | 0.4326  | 2.74607 | -2.16989 | 0.0300151   |
| <i>Kif22</i>    | 2.67271 | TCONS_00003921 | NM_001009645      | chr1:205440606-205467625  | rn Od | rn ld | OK | 1.41957 | 9.05154 | -3.08851 | 0.0020116   |

|                 |          |                |                   |                           |       |       |    |          |          |           |              |
|-----------------|----------|----------------|-------------------|---------------------------|-------|-------|----|----------|----------|-----------|--------------|
| <i>Ttc7a</i>    | 2. 67617 | TCONS_00068852 | NM_001100756      | chr6:20900465-21002088    | rn Od | rn_ld | OK | 1. 13089 | 7. 22817 | -2. 51291 | 0. 011974    |
| <i>Rbp1</i>     | 2. 67629 | TCONS_00078737 | NM_012733         | chr8:105891029-105912684  | rn Od | rn_ld | OK | 18. 4149 | 117. 71  | -3. 69784 | 0. 000217446 |
| <i>Has2</i>     | 2. 69389 | TCONS_00074334 | NM_013153         | chr7:97055457-97081461    | rn Od | rn_ld | OK | 0. 57107 | 3. 69512 | -3. 32601 | 0. 000880986 |
| <i>Ddx39a</i>   | 2. 69863 | TCONS_00040172 | NM_053563         | chr19:35825348-35834041   | rn Od | rn_ld | OK | 2. 748   | 17. 8396 | -2. 05497 | 0. 0398822   |
| <i>Cdc20</i>    | 2. 70318 | TCONS_00064759 | NM_171993         | chr5:141050191-141054395  | rn Od | rn_ld | OK | 1. 09609 | 7. 13817 | -3. 28638 | 0. 00101484  |
| <i>Myo1f</i>    | 2. 72105 | TCONS_00073012 | NM_001108076      | chr7:18618344-18669048    | rn Od | rn_ld | OK | 1. 48155 | 9. 76864 | -3. 74863 | 0. 000177803 |
| <i>Kifc1</i>    | 2. 72115 | TCONS_00048909 | NM_001005878      | chr20:7567670-7585191     | rn Od | rn_ld | OK | 0. 78797 | 5. 19586 | -3. 19218 | 0. 00141202  |
| <i>Slc1a5</i>   | 2. 72166 | TCONS_00000456 | NM_175758         | chr1:79953487-79971751    | rn Od | rn_ld | OK | 2. 30442 | 15. 2007 | -3. 19634 | 0. 00139184  |
| <i>Hbb</i>      | 2. 73968 | TCONS_00003643 | NM_033234         | chr1:175127945-175136083  | rn Od | rn_ld | OK | 188. 815 | 1261. 14 | -3. 94018 | 8. 14E-05    |
| <i>Ptges</i>    | 2. 7466  | TCONS_00052681 | NM_021583         | chr3:15086725-15098070    | rn Od | rn_ld | OK | 2. 66547 | 17. 8888 | -3. 5395  | 0. 000400879 |
| <i>Rhoh</i>     | 2. 74849 | TCONS_00027417 | NM_001013430      | chr14:43781205-43836120   | rn Od | rn_ld | OK | 0. 29621 | 1. 99058 | -2. 56475 | 0. 010325    |
| <i>Acox1</i>    | 2. 74915 | TCONS_00053409 | NM_001106508      | chr3:126606585-126919638  | rn Od | rn_ld | OK | 0. 09858 | 0. 66274 | -2. 64323 | 0. 00821187  |
| <i>Ctgf</i>     | 2. 7498  | TCONS_00002399 | NM_022266         | chr1:23331544-23334660    | rn Od | rn_ld | OK | 15. 3356 | 103. 151 | -4. 44029 | 8. 98E-06    |
| <i>Lyz2</i>     | 2. 75407 | TCONS_00074162 | NM_012771         | chr7:60337949-60343246    | rn Od | rn_ld | OK | 57. 2225 | 386. 033 | -4. 63417 | 3. 58E-06    |
| <i>Aspm</i>     | 2. 75597 | TCONS_00024036 | NM_001105955      | chr13:61564058-61609831   | rn Od | rn_ld | OK | 0. 18927 | 1. 27854 | -2. 48576 | 0. 0129275   |
| <i>Tagln2</i>   | 2. 75769 | TCONS_00024236 | NM_001013127      | chr13:95407076-95413997   | rn Od | rn_ld | OK | 35. 4975 | 240. 074 | -4. 55967 | 5. 12E-06    |
| <i>Slc7a7</i>   | 2. 76111 | TCONS_00030335 | NM_031341         | chr15:36894260-36945586   | rn Od | rn_ld | OK | 0. 52494 | 3. 55869 | -2. 50244 | 0. 0123339   |
| <i>Gcnt2</i>    | 2. 76173 | TCONS_00035620 | NM_001001511      | chr17:23615670-23719053   | rn Od | rn_ld | OK | 0. 60501 | 4. 10319 | -2. 00964 | 0. 0444697   |
| <i>Ugt1a7c</i>  | 2. 7637  | TCONS_00083846 | NM_130407         | chr9:94880264-94990037    | rn Od | rn_ld | OK | 2. 38606 | 16. 2045 | -2. 5396  | 0. 0110981   |
| <i>Slc28a2</i>  | 2. 78519 | TCONS_00051949 | NM_031664         | chr3:120896533-121186281  | rn Od | rn_ld | OK | 1. 04955 | 7. 23485 | -2. 23291 | 0. 0255547   |
| <i>Cd40</i>     | 2. 79452 | TCONS_00052385 | NM_134360         | chr3:167704271-167719544  | rn Od | rn_ld | OK | 0. 41887 | 2. 90615 | -2. 08783 | 0. 0368127   |
| <i>Nek2</i>     | 2. 81585 | TCONS_00024374 | NM_053691         | chr13:115071741-115084946 | rn Od | rn_ld | OK | 0. 42882 | 3. 01948 | -3. 25597 | 0. 00113005  |
| <i>Cp</i>       | 2. 82017 | TCONS_00042940 | NM_012532         | chr2:124467561-124551506  | rn Od | rn_ld | OK | 3. 26365 | 23. 0494 | -2. 15077 | 0. 0314943   |
| <i>LOC49827</i> | 2. 8243  | TCONS_00024790 | NM_001135992      | chr13:95687141-95697538   | rn Od | rn_ld | OK | 3. 18214 | 22. 5381 | -3. 79796 | 0. 000145895 |
| <i>Hlx</i>      | 2. 82695 | TCONS_00024875 | NM_001077674      | chr13:107315400-107320809 | rn Od | rn_ld | OK | 0. 40454 | 2. 87049 | -3. 07633 | 0. 00209563  |
| <i>Pla2g2d</i>  | 2. 83999 | TCONS_00063971 | NM_001013428      | chr5:160962030-160970154  | rn Od | rn_ld | OK | 0. 37745 | 2. 70259 | -2. 3639  | 0. 0180835   |
| <i>Rnf151</i>   | 2. 85849 | TCONS_00013383 | NM_001106987      | chr10:13899265-13901583   | rn Od | rn_ld | OK | 0. 1247  | 0. 90438 | -2. 2412  | 0. 0250134   |
| <i>Hba1</i>     | 2. 86239 | TCONS_00013452 | NM_013096         | chr10:15497888-15498744   | rn Od | rn_ld | OK | 187. 844 | 1366. 04 | -4. 80783 | 1. 53E-06    |
| <i>Pdlim7</i>   | 2. 86426 | TCONS_00035049 | NM_173125         | chr17:11762072-11777443   | rn Od | rn_ld | OK | 3. 38683 | 24. 6616 | -2. 19774 | 0. 0279676   |
| <i>Tnfrsf9</i>  | 2. 88266 | TCONS_00084019 | NM_181384         | chr9:8913003-8915338      | rn Od | rn_ld | OK | 0. 57339 | 4. 22876 | -2. 42886 | 0. 0151466   |
| <i>Hspb7</i>    | 2. 88287 | TCONS_00064012 | NM_031607         | chr5:163688615-163692102  | rn Od | rn_ld | OK | 0. 20231 | 1. 49224 | -2. 82317 | 0. 00475509  |
| <i>Oas3</i>     | 2. 89582 | TCONS_00021440 | NM_001009493      | chr12:43176425-43194139   | rn Od | rn_ld | OK | 0. 06186 | 0. 46042 | -2. 26202 | 0. 0236959   |
| <i>Pdpn</i>     | 2. 91545 | TCONS_00065096 | NM_019358         | chr5:165646113-165679595  | rn Od | rn_ld | OK | 21. 0484 | 158. 802 | -4. 77836 | 1. 77E-06    |
| <i>Akap12</i>   | 2. 93807 | TCONS_00000184 | NM_001033653      | chr1:42162162-42252615    | rn Od | rn_ld | OK | 4. 20763 | 32. 2466 | -2. 31654 | 0. 0205288   |
| <i>Kif11</i>    | 2. 94372 | TCONS_00002125 | NM_001169112      | chr1:263519575-263570293  | rn Od | rn_ld | OK | 0. 62809 | 4. 83248 | -3. 82604 | 0. 000130219 |
| <i>Crabp2</i>   | 2. 94807 | TCONS_00043209 | NM_017244         | chr2:206725432-206729779  | rn Od | rn_ld | OK | 6. 1924  | 47. 7877 | -3. 54302 | 0. 000395568 |
| <i>LOC49827</i> | 2. 95379 | TCONS_00024791 | NM_001135992_dup1 | chr13:95738131-95748528   | rn Od | rn_ld | OK | 3. 67082 | 28. 4409 | -4. 04763 | 5. 17E-05    |
| <i>Pglyrp1</i>  | 2. 95786 | TCONS_00000486 | NM_053373         | chr1:81052611-81057876    | rn Od | rn_ld | OK | 0. 41269 | 3. 20647 | -2. 31207 | 0. 0207737   |
| <i>Hcls1</i>    | 2. 96437 | TCONS_00019212 | NM_001011898      | chr11:69828260-69850286   | rn Od | rn_ld | OK | 2. 22107 | 17. 3351 | -3. 75498 | 0. 000173355 |
| <i>Ezr</i>      | 2. 96468 | TCONS_00002507 | NM_019357         | chr1:48590661-48634620    | rn Od | rn_ld | OK | 3. 51359 | 27. 4289 | -2. 9204  | 0. 00349585  |
| <i>Il4r</i>     | 2. 97185 | TCONS_00001499 | NM_133380         | chr1:203927940-203952929  | rn Od | rn_ld | OK | 2. 24411 | 17. 606  | -3. 19389 | 0. 0014037   |
| <i>Postn</i>    | 2. 98841 | TCONS_00043084 | NM_001108550      | chr2:163331135-163362444  | rn Od | rn_ld | OK | 1. 34262 | 10. 655  | -3. 08593 | 0. 00202915  |
| <i>Atad2</i>    | 3. 00556 | TCONS_00073313 | NM_001134879      | chr7:98589667-98631755    | rn Od | rn_ld | OK | 0. 5232  | 4. 20176 | -2. 489   | 0. 0128104   |
| <i>Lyc2</i>     | 3. 01057 | TCONS_00073184 | NM_001128494      | chr7:60318026-60325592    | rn Od | rn_ld | OK | 0. 53627 | 4. 32171 | -3. 3467  | 0. 00081781  |
| <i>Lyn</i>      | 3. 01793 | TCONS_00063167 | NM_030857         | chr5:21307093-21423261    | rn Od | rn_ld | OK | 1. 4868  | 12. 0431 | -2. 4592  | 0. 0139245   |

|                 |         |                |              |                           |       |       |    |         |         |          |             |
|-----------------|---------|----------------|--------------|---------------------------|-------|-------|----|---------|---------|----------|-------------|
| <i>Lgals3</i>   | 3.03174 | TCONS_00029803 | NM_031832    | chr15:28094343-28106279   | rn Od | rn Id | OK | 43.3754 | 354.722 | -4.9552  | 7.23E-07    |
| <i>Ccdc69</i>   | 3.03201 | TCONS_00013616 | NM_001109031 | chr10:40231946-40257584   | rn Od | rn Id | OK | 0.09612 | 0.78619 | -2.06369 | 0.0390469   |
| <i>Anxa1</i>    | 3.04263 | TCONS_00004427 | NM_012904    | chr1:245192874-245209070  | rn Od | rn Id | OK | 7.68572 | 63.3295 | -4.22896 | 2.35E-05    |
| <i>Ctsc</i>     | 3.04373 | TCONS_00001121 | NM_017097    | chr1:158231170-158263682  | rn Od | rn Id | OK | 4.40659 | 36.3375 | -3.44658 | 0.000567741 |
| <i>S1fn3</i>    | 3.04948 | TCONS_00012657 | NM_053687    | chr10:70045720-70069233   | rn Od | rn Id | OK | 2.53591 | 20.9952 | -4.51329 | 6.38E-06    |
| <i>Icam1</i>    | 3.06581 | TCONS_00078109 | NM_012967    | chr8:22091920-22105661    | rn Od | rn Id | OK | 1.17169 | 9.81097 | -2.98136 | 0.0028697   |
| <i>Camp</i>     | 3.10643 | TCONS_00079915 | NM_001100724 | chr8:117283070-117284884  | rn Od | rn Id | OK | 0.17799 | 1.53292 | -2.21662 | 0.0266488   |
| <i>Mcm6</i>     | 3.11888 | TCONS_00024455 | NM_017287    | chr13:50127491-50152683   | rn Od | rn Id | OK | 2.35055 | 20.4196 | -4.42656 | 9.57E-06    |
| <i>Ankrd1</i>   | 3.12474 | TCONS_00002114 | NM_013220    | chr1:262028001-262046691  | rn Od | rn Id | OK | 0.06307 | 0.55011 | -2.32562 | 0.0200387   |
| <i>Eme1</i>     | 3.13049 | TCONS_00014154 | NM_001105830 | chr10:82185899-82191905   | rn Od | rn Id | OK | 0.09594 | 0.84022 | -2.77591 | 0.00550469  |
| <i>Knstrn</i>   | 3.13471 | TCONS_00051881 | NM_001004264 | chr3:117157779-117177434  | rn Od | rn Id | OK | 0.48808 | 4.28678 | -3.26343 | 0.00110074  |
| <i>Rrm2</i>     | 3.13786 | TCONS_00069037 | NM_001025740 | chr6:60715754-60762351    | rn Od | rn Id | OK | 2.68193 | 23.6068 | -2.95246 | 0.00315254  |
| <i>Spc25</i>    | 3.14411 | TCONS_00052905 | NM_001009654 | chr3:62049988-62063416    | rn Od | rn Id | OK | 0.5612  | 4.96124 | -2.48876 | 0.0128191   |
| <i>Hba2</i>     | 3.14831 | TCONS_00013451 | NM_001007722 | chr10:15484458-15485302   | rn Od | rn Id | OK | 113.919 | 1010.03 | -5.18043 | 2.21E-07    |
| <i>Fcgr1a</i>   | 3.15524 | TCONS_00044475 | NM_001100836 | chr2:217916294-217925461  | rn Od | rn Id | OK | 2.1601  | 19.244  | -3.4584  | 0.000543385 |
| <i>Pla1a</i>    | 3.15765 | TCONS_00019198 | NM_138882    | chr11:67157657-67203665   | rn Od | rn Id | OK | 2.15651 | 19.2441 | -3.88686 | 0.000101549 |
| <i>Slc2a9</i>   | 3.16035 | TCONS_00026965 | NM_001191551 | chr14:77061785-77174290   | rn Od | rn Id | OK | 0.14526 | 1.29867 | -2.45679 | 0.0140185   |
| <i>Pyg1</i>     | 3.16467 | TCONS_00069950 | NM_022268    | chr6:102044910-102091119  | rn Od | rn Id | OK | 0.71974 | 6.45408 | -3.19329 | 0.0014066   |
| <i>Emp3</i>     | 3.16929 | TCONS_00003201 | NM_030847    | chr1:102979690-102982874  | rn Od | rn Id | OK | 11.751  | 105.712 | -3.94151 | 8.10E-05    |
| <i>Tspo</i>     | 3.21817 | TCONS_00073523 | NM_012515    | chr7:124449360-124459090  | rn Od | rn Id | OK | 9.55672 | 88.9354 | -4.4586  | 8.25E-06    |
| <i>Sbno2</i>    | 3.22282 | TCONS_00072934 | NM_001108068 | chr7:12641918-12685802    | rn Od | rn Id | OK | 2.45499 | 22.92   | -3.8886  | 0.000100822 |
| <i>S1pr3</i>    | 3.22344 | TCONS_00035575 | NM_001271143 | chr17:15871250-15884616   | rn Od | rn Id | OK | 3.78593 | 35.361  | -4.31904 | 1.57E-05    |
| <i>Fn1</i>      | 3.22401 | TCONS_00084394 | NM_019143    | chr9:78674306-78743650    | rn Od | rn Id | OK | 5.73283 | 53.5665 | -3.3514  | 0.000804034 |
| <i>Fcgr2b</i>   | 3.23063 | TCONS_00024752 | NM_175756    | chr13:93966565-93983119   | rn Od | rn Id | OK | 3.25436 | 30.5479 | -3.11976 | 0.00181001  |
| <i>Fam64a</i>   | 3.23695 | TCONS_00012442 | NM_001113781 | chr10:58354689-58359531   | rn Od | rn Id | OK | 0.46869 | 4.41879 | -3.54687 | 0.000389835 |
| <i>Eif4ebp1</i> | 3.24149 | TCONS_00033218 | NM_053857    | chr16:68580262-68593808   | rn Od | rn Id | OK | 4.60476 | 43.5504 | -4.27775 | 1.89E-05    |
| <i>Dc1kl</i>    | 3.24378 | TCONS_00043092 | NM_021584    | chr2:164062180-164355200  | rn Od | rn Id | OK | 8.81141 | 83.4683 | -2.3724  | 0.0176731   |
| <i>Sectm1b</i>  | 3.25705 | TCONS_00014617 | NM_199082    | chr10:109838187-109846753 | rn Od | rn Id | OK | 0.25099 | 2.39953 | -3.08968 | 0.00200375  |
| <i>Capg</i>     | 3.26325 | TCONS_00058391 | NM_001013086 | chr4:165172598-165189840  | rn Od | rn Id | OK | 2.44214 | 23.4481 | -2.46294 | 0.0137803   |
| <i>Orc1</i>     | 3.29421 | TCONS_00063583 | NM_177931    | chr5:132031218-132050961  | rn Od | rn Id | OK | 0.18876 | 1.85165 | -2.94103 | 0.00327124  |
| <i>Cc124</i>    | 3.29995 | TCONS_00021278 | NM_001013045 | chr12:26145848-26149929   | rn Od | rn Id | OK | 0.3441  | 3.38901 | -2.73434 | 0.00625047  |
| <i>Clec12a</i>  | 3.32833 | TCONS_00058623 | NM_001134716 | chr4:211756067-211774947  | rn Od | rn Id | OK | 1.63101 | 16.3826 | -2.76875 | 0.00562721  |
| <i>Ercc61</i>   | 3.33386 | TCONS_00087861 | NM_001098674 | chrX:72862520-72878439    | rn Od | rn Id | OK | 0.15293 | 1.54202 | -3.37782 | 0.000730633 |
| <i>Tnni2</i>    | 3.33847 | TCONS_00001725 | NM_017185    | chr1:222504476-222507019  | rn Od | rn Id | OK | 0.11214 | 1.13429 | -2.18627 | 0.0287956   |
| <i>Stxbp2</i>   | 3.38735 | TCONS_00021064 | NM_031126    | chr12:4342229-4353949     | rn Od | rn Id | OK | 0.39747 | 4.15904 | -2.15251 | 0.031357    |
| <i>Itgal</i>    | 3.39031 | TCONS_00001527 | NM_001033998 | chr1:205742354-205780791  | rn Od | rn Id | OK | 0.39657 | 4.1582  | -2.58706 | 0.00967983  |
| <i>Chek1</i>    | 3.40197 | TCONS_00079295 | NM_080400    | chr8:39184019-39204446    | rn Od | rn Id | OK | 0.38074 | 4.02464 | -2.02136 | 0.0432424   |
| <i>Pf4</i>      | 3.41342 | TCONS_00027313 | NM_001007729 | chr14:18758102-18759063   | rn Od | rn Id | OK | 4.52813 | 48.2458 | -2.637   | 0.00836419  |
| <i>Gfpt2</i>    | 3.41591 | TCONS_00012096 | NM_001002819 | chr10:35051131-35097280   | rn Od | rn Id | OK | 0.83177 | 8.87753 | -3.6262  | 0.00028762  |
| <i>Aldh112</i>  | 3.42686 | TCONS_00073051 | NM_001191778 | chr7:26506320-26555273    | rn Od | rn Id | OK | 0.17312 | 1.86176 | -2.69981 | 0.00693793  |
| <i>Plp2</i>     | 3.4334  | TCONS_00087052 | NM_207601    | chrX:16470479-16484448    | rn Od | rn Id | OK | 5.76965 | 62.3314 | -3.95907 | 7.52E-05    |
| <i>Crh</i>      | 3.44833 | TCONS_00044064 | NM_031019    | chr2:124182918-124184783  | rn Od | rn Id | OK | 0.42422 | 4.63061 | -3.42673 | 0.000610903 |
| <i>Edn1</i>     | 3.46662 | TCONS_00035622 | NM_012548    | chr17:24118008-24124009   | rn Od | rn Id | OK | 0.97899 | 10.8227 | -4.13357 | 3.57E-05    |
| <i>LOC24906</i> | 3.47455 | TCONS_00012208 | NM_031537    | chr10:43664046-43672414   | rn Od | rn Id | OK | 0.17735 | 1.97144 | -3.05589 | 0.00224391  |
| <i>Nuf2</i>     | 3.47602 | TCONS_00024734 | NM_001012028 | chr13:92449931-92486893   | rn Od | rn Id | OK | 0.36386 | 4.04873 | -2.35313 | 0.0186161   |

|                 |         |                |              |                           |       |       |    |         |         |          |             |
|-----------------|---------|----------------|--------------|---------------------------|-------|-------|----|---------|---------|----------|-------------|
| <i>Syp12</i>    | 3.49655 | TCONS_00044582 | NM_001108563 | chr2:230472383-230487115  | rn_0d | rn_1d | OK | 0.11923 | 1.34575 | -3.47703 | 0.000506993 |
| <i>Procr</i>    | 3.49741 | TCONS_00052266 | NM_001025733 | chr3:157650256-157654713  | rn_0d | rn_1d | OK | 1.75963 | 19.8723 | -4.44792 | 8.67E-06    |
| <i>Olr1</i>     | 3.51363 | TCONS_00059557 | NM_133306    | chr4:211883402-211905489  | rn_0d | rn_1d | OK | 0.60086 | 6.86253 | -4.28988 | 1.79E-05    |
| <i>Slamf9</i>   | 3.52372 | TCONS_00024232 | NM_001105971 | chr13:95381995-95384776   | rn_0d | rn_1d | OK | 0.91318 | 10.5027 | -4.03121 | 5.55E-05    |
| <i>Epcam</i>    | 3.52377 | TCONS_00069668 | NM_138541    | chr6:21264115-21280099    | rn_0d | rn_1d | OK | 0.28595 | 3.28886 | -3.25479 | 0.00113477  |
| <i>LOC68906</i> | 3.52486 | TCONS_00003640 | NM_001111269 | chr1:175098754-175100120  | rn_0d | rn_1d | OK | 20.697  | 238.229 | -5.12883 | 2.92E-07    |
| <i>Fcgr2a</i>   | 3.52791 | TCONS_00024788 | NM_053843    | chr13:95665161-95678334   | rn_0d | rn_1d | OK | 1.90948 | 22.0253 | -3.32981 | 0.000869041 |
| <i>LOC36306</i> | 3.54116 | TCONS_00078378 | NM_001014209 | chr8:53522675-53534330    | rn_0d | rn_1d | OK | 0.11706 | 1.36275 | -3.02255 | 0.00250655  |
| <i>Mab2113</i>  | 3.54469 | TCONS_00044516 | NM_001106456 | chr2:223666826-223689474  | rn_0d | rn_1d | OK | 0.05711 | 0.66647 | -3.2868  | 0.00101332  |
| <i>Aspg</i>     | 3.56106 | TCONS_00069528 | NM_144750    | chr6:145692021-145711786  | rn_0d | rn_1d | OK | 0.73788 | 8.709   | -2.99984 | 0.00270123  |
| <i>Itgb2</i>    | 3.5855  | TCONS_00049510 | NM_001037780 | chr20:13944168-13981060   | rn_0d | rn_1d | OK | 0.8009  | 9.61435 | -2.4992  | 0.0124475   |
| <i>Clic1</i>    | 3.59415 | TCONS_00048883 | NM_001002807 | chr20:7113248-7122093     | rn_0d | rn_1d | OK | 15.3568 | 185.458 | -5.15986 | 2.47E-07    |
| <i>Tm4sf1</i>   | 3.601   | TCONS_00044181 | NM_001106434 | chr2:166792564-166965410  | rn_0d | rn_1d | OK | 1.80041 | 21.8465 | -2.69237 | 0.00709456  |
| <i>Ifitm1</i>   | 3.62281 | TCONS_00001684 | NM_001106314 | chr1:220687002-220689004  | rn_0d | rn_1d | OK | 2.43006 | 29.9359 | -3.08987 | 0.00200243  |
| <i>Cebpd</i>    | 3.64139 | TCONS_00018984 | NM_013154    | chr11:92069757-92070896   | rn_0d | rn_1d | OK | 4.42805 | 55.2559 | -4.9359  | 7.98E-07    |
| <i>Cenpw</i>    | 3.68475 | TCONS_00000136 | NM_001246319 | chr1:31347826-31352722    | rn_0d | rn_1d | OK | 0.19439 | 2.49973 | -3.33788 | 0.000844188 |
| <i>Pstpip1</i>  | 3.68638 | TCONS_00078444 | NM_001106824 | chr8:59330663-59370472    | rn_0d | rn_1d | OK | 0.68408 | 8.80676 | -2.49017 | 0.0127682   |
| <i>Tnfrsf12</i> | 3.69401 | TCONS_00013340 | NM_181086    | chr10:12818948-12820975   | rn_0d | rn_1d | OK | 7.62256 | 98.6523 | -5.22273 | 1.76E-07    |
| <i>Cd3001e</i>  | 3.7032  | TCONS_00013115 | NM_001202463 | chr10:104711284-104721027 | rn_0d | rn_1d | OK | 0.76863 | 10.0113 | -2.62534 | 0.00865623  |
| <i>I11a</i>     | 3.70487 | TCONS_00052020 | NM_017019    | chr3:128180287-128190980  | rn_0d | rn_1d | OK | 0.0535  | 0.69758 | -2.35693 | 0.0184266   |
| <i>F2r11</i>    | 3.73437 | TCONS_00043817 | NM_053897    | chr2:44378261-44391213    | rn_0d | rn_1d | OK | 0.45744 | 6.08822 | -4.39351 | 1.12E-05    |
| <i>Ckap2</i>    | 3.73784 | TCONS_00032787 | NM_001169139 | chr16:74383669-74410206   | rn_0d | rn_1d | OK | 0.4386  | 5.85157 | -3.50592 | 0.00045503  |
| <i>Hbegf</i>    | 3.75487 | TCONS_00038290 | NM_012945    | chr18:29036337-29046746   | rn_0d | rn_1d | OK | 1.71292 | 23.1241 | -2.73945 | 0.00615427  |
| <i>Lbp</i>      | 3.75493 | TCONS_00053652 | NM_017208    | chr3:160792718-160819979  | rn_0d | rn_1d | OK | 1.44043 | 19.4465 | -4.39078 | 1.13E-05    |
| <i>Dusp5</i>    | 3.79971 | TCONS_00002262 | NM_133578    | chr1:281658074-281671486  | rn_0d | rn_1d | OK | 0.64054 | 8.92018 | -4.57033 | 4.87E-06    |
| <i>Zmym6nb</i>  | 3.83002 | TCONS_00063793 | NM_001271137 | chr5:148958332-148962001  | rn_0d | rn_1d | OK | 0.28896 | 4.10947 | -2.01285 | 0.0441307   |
| <i>Trh</i>      | 3.83263 | TCONS_00058535 | NM_013046    | chr4:189148769-189151296  | rn_0d | rn_1d | OK | 3.52711 | 50.2524 | -5.21286 | 1.86E-07    |
| <i>Enpp3</i>    | 3.83383 | TCONS_00000088 | NM_019370    | chr1:23093115-23164281    | rn_0d | rn_1d | OK | 1.03433 | 14.7488 | -5.13299 | 2.85E-07    |
| <i>Hist1h2b</i> | 3.83977 | TCONS_00035337 | NM_001109400 | chr17:58942756-58943137   | rn_0d | rn_1d | OK | 0.19189 | 2.74747 | -2.29611 | 0.0216696   |
| <i>Aqp5</i>     | 3.85065 | TCONS_00087428 | NM_012779    | chrX:115753752-115757279  | rn_0d | rn_1d | OK | 0.03192 | 0.46057 | -2.07744 | 0.0377613   |
| <i>Sox7</i>     | 3.87016 | TCONS_00030008 | NM_001106045 | chr15:51053092-51059854   | rn_0d | rn_1d | OK | 0.65568 | 9.58792 | -4.98657 | 6.15E-07    |
| <i>Cdk1</i>     | 3.88473 | TCONS_00049098 | NM_019296    | chr20:22694920-22709859   | rn_0d | rn_1d | OK | 1.19249 | 17.6148 | -4.73088 | 2.24E-06    |
| <i>Olah</i>     | 3.94507 | TCONS_00035413 | NM_022705    | chr17:80520859-80545527   | rn_0d | rn_1d | OK | 0.0278  | 0.42812 | -2.36477 | 0.0180415   |
| <i>Mmp19</i>    | 3.95129 | TCONS_00072814 | NM_001107159 | chr7:3187823-3195771      | rn_0d | rn_1d | OK | 0.97095 | 15.0194 | -3.53782 | 0.000403447 |
| <i>GaInt3</i>   | 3.95676 | TCONS_00052895 | NM_001015032 | chr3:58806416-58843442    | rn_0d | rn_1d | OK | 0.0565  | 0.87723 | -2.1944  | 0.0282066   |
| <i>Plin2</i>    | 3.96631 | TCONS_00064582 | NM_001007144 | chr5:108973077-108999219  | rn_0d | rn_1d | OK | 8.11028 | 126.769 | -4.16981 | 3.05E-05    |
| <i>Clca4l</i>   | 3.99294 | TCONS_00044729 | NM_001077356 | chr2:269312354-269332154  | rn_0d | rn_1d | OK | 0.13633 | 2.17064 | -3.91693 | 8.97E-05    |
| <i>Flnc</i>     | 4.0153  | TCONS_00058054 | NM_001191862 | chr4:56478246-56505940    | rn_0d | rn_1d | OK | 3.21241 | 51.9465 | -5.36534 | 8.08E-08    |
| <i>Asf1b</i>    | 4.0313  | TCONS_00040180 | NM_001107160 | chr19:36055966-36070506   | rn_0d | rn_1d | OK | 0.39692 | 6.49001 | -4.37347 | 1.22E-05    |
| <i>Tnfaip6</i>  | 4.03795 | TCONS_00051420 | NM_053382    | chr3:42649265-42663190    | rn_0d | rn_1d | OK | 4.29334 | 70.5246 | -5.60108 | 2.13E-08    |
| <i>Alox15</i>   | 4.04881 | TCONS_00013848 | NM_031010    | chr10:56704493-56713192   | rn_0d | rn_1d | OK | 0.3924  | 6.4944  | -4.3226  | 1.54E-05    |
| <i>Inmt</i>     | 4.06564 | TCONS_00059281 | NM_001109022 | chr4:150039150-150043447  | rn_0d | rn_1d | OK | 0.7679  | 12.8583 | -4.57586 | 4.74E-06    |
| <i>Cd68</i>     | 4.07184 | TCONS_00013812 | NM_001031638 | chr10:56014363-56016243   | rn_0d | rn_1d | OK | 1.57917 | 26.5569 | -5.14795 | 2.63E-07    |
| <i>Arg1</i>     | 4.07211 | TCONS_00000086 | NM_017134    | chr1:23004480-23017712    | rn_0d | rn_1d | OK | 2.20884 | 37.1529 | -4.95053 | 7.40E-07    |
| <i>Rin1</i>     | 4.10779 | TCONS_00001812 | NM_139038    | chr1:227266339-227270986  | rn_0d | rn_1d | OK | 0.16136 | 2.78203 | -4.19202 | 2.76E-05    |

|                 |         |                |                |                           |       |       |    |         |         |          |             |
|-----------------|---------|----------------|----------------|---------------------------|-------|-------|----|---------|---------|----------|-------------|
| <i>Fam110c</i>  | 4.1187  | TCONS_00069015 | NM_001025051   | chr6:58647799-58654058    | rn_0d | rn_1d | OK | 0.026   | 0.45167 | -3.01581 | 0.00256294  |
| <i>LOC69114</i> | 4.12434 | TCONS_00078129 | NM_001109624   | chr8:22613206-22630263    | rn_0d | rn_1d | OK | 0.37993 | 6.62606 | -4.33238 | 1.48E-05    |
| <i>Cd14</i>     | 4.1455  | TCONS_00038293 | NM_021744      | chr18:29265350-29266946   | rn_0d | rn_1d | OK | 2.33092 | 41.2522 | -5.62705 | 1.83E-08    |
| <i>Esm1</i>     | 4.1753  | TCONS_00042745 | NM_022604      | chr2:64137198-64145937    | rn_0d | rn_1d | OK | 2.18653 | 39.5044 | -5.79784 | 6.72E-09    |
| <i>Rin1</i>     | 4.17764 | TCONS_00001818 | NM_139038_dup1 | chr1:227359503-227364150  | rn_0d | rn_1d | OK | 0.16136 | 2.92005 | -4.26795 | 1.97E-05    |
| <i>Dusp2</i>    | 4.19109 | TCONS_00051996 | NM_001012089   | chr3:126303198-126305375  | rn_0d | rn_1d | OK | 0.32329 | 5.90521 | -4.28169 | 1.85E-05    |
| <i>Gpnb</i>     | 4.23516 | TCONS_00058251 | NM_133298      | chr4:143383025-143404104  | rn_0d | rn_1d | OK | 8.42541 | 158.672 | -6.48087 | 9.12E-11    |
| <i>Ncf4</i>     | 4.26738 | TCONS_00073424 | NM_001127304   | chr7:119473858-119490871  | rn_0d | rn_1d | OK | 0.82584 | 15.904  | -5.30542 | 1.12E-07    |
| <i>Myc</i>      | 4.28985 | TCONS_00073330 | NM_012603      | chr7:103157451-103162378  | rn_0d | rn_1d | OK | 0.82249 | 16.088  | -4.47789 | 7.54E-06    |
| <i>Slc4a1</i>   | 4.31424 | TCONS_00014344 | NM_012651      | chr10:90084738-90101181   | rn_0d | rn_1d | OK | 0.0728  | 1.44831 | -4.25501 | 2.09E-05    |
| <i>Gldn</i>     | 4.33265 | TCONS_00078422 | NM_181382      | chr8:57446588-57490039    | rn_0d | rn_1d | OK | 4.5729  | 92.1404 | -6.37171 | 1.87E-10    |
| <i>Atf3</i>     | 4.33355 | TCONS_00024911 | NM_012912      | chr13:114411692-114468322 | rn_0d | rn_1d | OK | 1.37507 | 27.7238 | -5.76861 | 7.99E-09    |
| <i>Ube2c</i>    | 4.35698 | TCONS_00052376 | NM_001106542   | chr3:167422568-167424969  | rn_0d | rn_1d | OK | 0.61477 | 12.5978 | -4.46425 | 8.04E-06    |
| <i>Mybl2</i>    | 4.35903 | TCONS_00052337 | NM_001106536   | chr3:165617177-165645609  | rn_0d | rn_1d | OK | 0.14292 | 2.9328  | -4.49346 | 7.01E-06    |
| <i>Kif2c</i>    | 4.38822 | TCONS_00064732 | NM_001085369   | chr5:139821000-139846591  | rn_0d | rn_1d | OK | 0.09431 | 1.97491 | -3.07229 | 0.00212427  |
| <i>Trpv4</i>    | 4.40043 | TCONS_00021505 | NM_023970      | chr12:49492069-49529956   | rn_0d | rn_1d | OK | 0.09466 | 1.9991  | -2.96277 | 0.00304887  |
| <i>Thbs2</i>    | 4.41482 | TCONS_00002557 | NM_001169138   | chr1:57842345-57871988    | rn_0d | rn_1d | OK | 3.55795 | 75.8917 | -5.63057 | 1.80E-08    |
| <i>Ccr1</i>     | 4.41547 | TCONS_00080032 | NM_020542      | chr8:132146469-132153481  | rn_0d | rn_1d | OK | 0.62894 | 13.4214 | -4.29002 | 1.79E-05    |
| <i>Plau</i>     | 4.43481 | TCONS_00030175 | NM_013085      | chr15:3621056-3627772     | rn_0d | rn_1d | OK | 0.4139  | 8.95167 | -4.56691 | 4.95E-06    |
| <i>Fb1</i>      | 4.49196 | TCONS_00000613 | NM_001025643   | chr1:86319810-86328915    | rn_0d | rn_1d | OK | 1.70171 | 38.2914 | -2.07934 | 0.0375864   |
| <i>Ube2t</i>    | 4.51512 | TCONS_00024007 | NM_001108344   | chr13:56842244-56853343   | rn_0d | rn_1d | OK | 0.18243 | 4.1715  | -3.03438 | 0.0024103   |
| <i>Ripk3</i>    | 4.55216 | TCONS_00030385 | NM_139342      | chr15:38358405-38390939   | rn_0d | rn_1d | OK | 0.37578 | 8.81598 | -2.16503 | 0.0303855   |
| <i>MGC10564</i> | 4.61384 | TCONS_00051954 | NM_001008518   | chr3:121310710-121314264  | rn_0d | rn_1d | OK | 0.38627 | 9.45783 | -4.35192 | 1.35E-05    |
| <i>Cyr61</i>    | 4.64348 | TCONS_00044734 | NM_031327      | chr2:270055953-270058912  | rn_0d | rn_1d | OK | 2.82616 | 70.6354 | -6.56102 | 5.34E-11    |
| <i>Clec7a</i>   | 4.68507 | TCONS_00059556 | NM_001173386   | chr4:211834025-211870955  | rn_0d | rn_1d | OK | 0.3468  | 8.9213  | -3.26012 | 0.00111366  |
| <i>Myod1</i>    | 4.69178 | TCONS_00000853 | NM_176079      | chr1:103481603-103484314  | rn_0d | rn_1d | OK | 0.02475 | 0.63955 | -2.85843 | 0.00425738  |
| <i>I11b</i>     | 4.70372 | TCONS_00052019 | NM_031512      | chr3:128133928-128140351  | rn_0d | rn_1d | OK | 0.34725 | 9.0489  | -5.00368 | 5.62E-07    |
| <i>Napsa</i>    | 4.72807 | TCONS_00000789 | NM_031670      | chr1:101642883-101655189  | rn_0d | rn_1d | OK | 0.24111 | 6.39015 | -3.40112 | 0.000671104 |
| <i>Mms221</i>   | 4.77509 | TCONS_00063242 | NM_001135780   | chr5:43473573-43590298    | rn_0d | rn_1d | OK | 0.08613 | 2.35832 | -2.70188 | 0.00689479  |
| <i>LOC29879</i> | 4.78338 | TCONS_00068891 | NM_001013941   | chr6:33617272-33618546    | rn_0d | rn_1d | OK | 0.0622  | 1.71278 | -3.54364 | 0.000394639 |
| <i>Lox14</i>    | 4.79062 | TCONS_00004559 | NM_001107592   | chr1:269286406-269305014  | rn_0d | rn_1d | OK | 0.0392  | 1.08488 | -2.08865 | 0.0367393   |
| <i>Cav3</i>     | 4.90533 | TCONS_00058573 | NM_019155      | chr4:207683201-207699176  | rn_0d | rn_1d | OK | 0.03284 | 0.98401 | -2.99955 | 0.00270376  |
| <i>Plk1</i>     | 4.93016 | TCONS_00001471 | NM_017100      | chr1:199178261-199188238  | rn_0d | rn_1d | OK | 0.14182 | 4.32387 | -2.15215 | 0.0313854   |
| <i>Steap1</i>   | 4.93337 | TCONS_00057938 | NM_001106629   | chr4:25343974-25354493    | rn_0d | rn_1d | OK | 0.28581 | 8.73319 | -4.16463 | 3.12E-05    |
| <i>Maff</i>     | 4.97505 | TCONS_00073461 | NM_001130573   | chr7:120572278-120585142  | rn_0d | rn_1d | OK | 1.07823 | 33.9115 | -5.62816 | 1.82E-08    |
| <i>Cc19</i>     | 5.00214 | TCONS_00014040 | NM_001012357   | chr10:70416901-70421785   | rn_0d | rn_1d | OK | 0.03525 | 1.12965 | -3.06116 | 0.00220483  |
| <i>Sdc1</i>     | 5.05929 | TCONS_00068967 | NM_013026      | chr6:43667443-43689903    | rn_0d | rn_1d | OK | 0.56    | 18.672  | -4.91251 | 8.99E-07    |
| <i>Spink2</i>   | 5.10406 | TCONS_00026832 | NM_001008870   | chr14:33038332-33044841   | rn_0d | rn_1d | OK | 0.05293 | 1.82044 | -2.28863 | 0.022101    |
| <i>Ptx3</i>     | 5.12956 | TCONS_00043130 | NM_001109536   | chr2:177231296-177513886  | rn_0d | rn_1d | OK | 0.3086  | 10.8029 | -3.4917  | 0.000479958 |
| <i>Slc16a3</i>  | 5.13419 | TCONS_00013226 | NM_030834      | chr10:109727314-109735890 | rn_0d | rn_1d | OK | 0.47762 | 16.7734 | -6.1474  | 7.88E-10    |
| <i>Hmx1</i>     | 5.15045 | TCONS_00040104 | NM_012580      | chr19:25622555-25629377   | rn_0d | rn_1d | OK | 6.31633 | 224.339 | -7.4728  | 7.86E-14    |
| <i>Bst1</i>     | 5.30522 | TCONS_00027482 | NM_030848      | chr14:71827039-71843340   | rn_0d | rn_1d | OK | 0.1847  | 7.30295 | -5.03704 | 4.73E-07    |
| <i>Bc13</i>     | 5.34094 | TCONS_00002840 | NM_001109422   | chr1:81995864-82010428    | rn_0d | rn_1d | OK | 0.14626 | 5.92801 | -2.68247 | 0.00730798  |
| <i>Cd8a</i>     | 5.37758 | TCONS_00058370 | NM_031538      | chr4:164017632-164021870  | rn_0d | rn_1d | OK | 0.08246 | 3.42795 | -3.51513 | 0.000439541 |
| <i>I16</i>      | 5.41127 | TCONS_00057850 | NM_012589      | chr4:3095535-3100112      | rn_0d | rn_1d | OK | 0.29502 | 12.5549 | -5.07295 | 3.92E-07    |



|                 |          |                |                |                            |       |       |    |         |         |          |             |
|-----------------|----------|----------------|----------------|----------------------------|-------|-------|----|---------|---------|----------|-------------|
| <i>Ly6c</i>     | 5.56205  | TCONS_00027348 | NM_020103      | chr14:22767861-22770928    | rn_0d | rn_1d | OK | 0.16103 | 7.60754 | -3.4291  | 0.000605586 |
| <i>Ly6c</i>     | 5.56205  | TCONS_00078004 | NM_020103      | chr7_AABR06109985_random:7 | rn_0d | rn_1d | OK | 0.16103 | 7.60754 | -3.4291  | 0.000605586 |
| <i>Itgb7</i>    | 5.77834  | TCONS_00074794 | NM_013171      | chr7:141618019-141635053   | rn_0d | rn_1d | OK | 0.04653 | 2.55391 | -4.02334 | 5.74E-05    |
| <i>Cldn23</i>   | 5.90073  | TCONS_00032684 | NM_001033062   | chr16:59664247-59665972    | rn_0d | rn_1d | OK | 0.02992 | 1.78767 | -3.65223 | 0.000259978 |
| <i>C1cf1</i>    | 6.13784  | TCONS_00001795 | NM_207615      | chr1:226338539-226342119   | rn_0d | rn_1d | OK | 0.24629 | 17.343  | -6.22228 | 4.90E-10    |
| <i>Cc13</i>     | 6.15684  | TCONS_00014042 | NM_013025      | chr10:70501118-70518302    | rn_0d | rn_1d | OK | 0.23957 | 17.0934 | -4.08947 | 4.32E-05    |
| <i>Nfe2</i>     | 6.20177  | TCONS_00074812 | NM_001012224   | chr7:142654115-142661467   | rn_0d | rn_1d | OK | 0.02553 | 1.87936 | -3.84895 | 0.000118626 |
| <i>Gprc5a</i>   | 6.34409  | TCONS_00058826 | NM_001079890   | chr4:233105138-233123586   | rn_0d | rn_1d | OK | 0.1549  | 12.584  | -6.37584 | 1.82E-10    |
| <i>Nos2</i>     | 6.3614   | TCONS_00013980 | NM_012611      | chr10:65335227-65456957    | rn_0d | rn_1d | OK | 0.07616 | 6.26202 | -5.48236 | 4.20E-08    |
| <i>RGD15617</i> | 6.45821  | TCONS_00014464 | NM_001168284   | chr10:103216119-103364939  | rn_0d | rn_1d | OK | 0.11682 | 10.2716 | -2.08141 | 0.0373961   |
| <i>Lcn2</i>     | 6.69651  | TCONS_00052712 | NM_130741      | chr3:16763058-16766404     | rn_0d | rn_1d | OK | 2.16627 | 224.678 | -8.92123 | 0           |
| <i>S100a9</i>   | 6.8967   | TCONS_00044416 | NM_053587      | chr2:209531411-209534093   | rn_0d | rn_1d | OK | 1.20391 | 143.452 | -7.81469 | 5.55E-15    |
| <i>Mmp3</i>     | 6.97605  | TCONS_00078030 | NM_133523      | chr8:5680373-5701427       | rn_0d | rn_1d | OK | 0.1082  | 13.6214 | -6.11669 | 9.55E-10    |
| <i>Slpi12</i>   | 7.09373  | TCONS_00053694 | NM_001008872   | chr3:166921183-166983345   | rn_0d | rn_1d | OK | 0.1658  | 22.6472 | -2.02387 | 0.0429838   |
| <i>Il1r2</i>    | 7.17686  | TCONS_00083498 | NM_053953      | chr9:46526297-46566510     | rn_0d | rn_1d | OK | 0.07873 | 11.3911 | -5.09777 | 3.44E-07    |
| <i>Cxc11</i>    | 7.23261  | TCONS_00027311 | NM_030845      | chr14:18653031-18655163    | rn_0d | rn_1d | OK | 0.16943 | 25.4818 | -5.66306 | 1.49E-08    |
| <i>Cc17</i>     | 7.68257  | TCONS_00012641 | NM_001007612   | chr10:69058108-69059959    | rn_0d | rn_1d | OK | 0.61557 | 126.463 | -8.6711  | 0           |
| <i>Kngr1</i>    | 7.75879  | TCONS_00019323 | NM_012696      | chr11:84453507-84612796    | rn_0d | rn_1d | OK | 0.02331 | 5.04897 | -4.63166 | 3.63E-06    |
| <i>Dio3</i>     | 7.83425  | TCONS_00069501 | NM_017210      | chr6:143766522-143768383   | rn_0d | rn_1d | OK | 0.05008 | 11.4294 | -5.9995  | 1.98E-09    |
| <i>Serpine1</i> | 7.88432  | TCONS_00021257 | NM_012620      | chr12:24653384-24663763    | rn_0d | rn_1d | OK | 0.72033 | 170.195 | -10.5857 | 0           |
| <i>Cxc12</i>    | 7.90697  | TCONS_00027310 | NM_053647      | chr14:18640311-18642357    | rn_0d | rn_1d | OK | 0.08994 | 21.5874 | -5.51745 | 3.44E-08    |
| <i>Fcnb</i>     | 8.17181  | TCONS_00052638 | NM_053634      | chr3:11974690-11983068     | rn_0d | rn_1d | OK | 0.03462 | 9.98414 | -5.13451 | 2.83E-07    |
| <i>Se1p</i>     | 8.3534   | TCONS_00024148 | NM_013114      | chr13:87318110-87344163    | rn_0d | rn_1d | OK | 0.01213 | 3.96789 | -5.25673 | 1.47E-07    |
| <i>Cc12</i>     | 8.52334  | TCONS_00012640 | NM_031530      | chr10:69047090-69048889    | rn_0d | rn_1d | OK | 0.75555 | 277.999 | -9.91523 | 0           |
| <i>Slpi</i>     | 8.63307  | TCONS_00053696 | NM_053372      | chr3:166921183-166983345   | rn_0d | rn_1d | OK | 0.39119 | 155.311 | -7.60509 | 2.84E-14    |
| <i>RGD15653</i> | 8.67251  | TCONS_00021068 | NM_001134602   | chr12:4374152-4379850      | rn_0d | rn_1d | OK | 0.03539 | 14.4405 | -5.21698 | 1.82E-07    |
| <i>Cc112</i>    | 8.75669  | TCONS_00012643 | NM_001105822   | chr10:69111875-69113426    | rn_0d | rn_1d | OK | 0.09207 | 39.8225 | -5.53199 | 3.17E-08    |
| 4d vs. 0d       |          |                |                |                            |       |       |    |         |         |          |             |
| <i>Olig3</i>    | -2.78234 | TCONS_00000043 | NM_001106269   | chr1:16343567-16345637     | rn_0d | rn_4d | OK | 0.50363 | 0.07321 | 2.21011  | 0.0270976   |
| <i>Ifngr1</i>   | 2.1821   | TCONS_00000044 | NM_053783      | chr1:16607412-16628023     | rn_0d | rn_4d | OK | 15.9215 | 72.2537 | -2.5862  | 0.00970406  |
| <i>Enpp3</i>    | 3.56739  | TCONS_00000088 | NM_019370      | chr1:23093115-23164281     | rn_0d | rn_4d | OK | 1.03433 | 12.2617 | -4.72592 | 2.29E-06    |
| <i>Cenpw</i>    | 4.85219  | TCONS_00000136 | NM_001246319   | chr1:31347826-31352722     | rn_0d | rn_4d | OK | 0.19439 | 5.61468 | -4.36142 | 1.29E-05    |
| <i>Ube2q11</i>  | -2.24622 | TCONS_00000165 | NM_001145163   | chr1:37582311-37622672     | rn_0d | rn_4d | OK | 28.0732 | 5.91715 | 2.58723  | 0.00967512  |
| <i>Rnaset2</i>  | 2.67287  | TCONS_00000238 | NM_001106210   | chr1:54416537-54442344     | rn_0d | rn_4d | OK | 35.7693 | 228.099 | -3.7588  | 0.00017073  |
| <i>Ssc5d</i>    | 3.22344  | TCONS_00000419 | NM_001134545   | chr1:76074425-76092319     | rn_0d | rn_4d | OK | 0.99393 | 9.28346 | -2.12215 | 0.0338248   |
| <i>Ceacam9</i>  | -3.35151 | TCONS_00000453 | NM_053919      | chr1:79906413-79910949     | rn_0d | rn_4d | OK | 0.46815 | 0.04586 | 2.01661  | 0.0437365   |
| <i>Ceacam10</i> | 2.39428  | TCONS_00000555 | NM_173339      | chr1:82900923-82907200     | rn_0d | rn_4d | OK | 2.11319 | 11.1093 | -2.74037 | 0.00613706  |
| <i>Tgfb1</i>    | 3.29542  | TCONS_00000575 | NM_021578      | chr1:83741412-83758472     | rn_0d | rn_4d | OK | 4.44053 | 43.597  | -3.82356 | 0.00013154  |
| <i>Ceacam10</i> | 2.39428  | TCONS_00000576 | NM_173339_dup1 | chr1:84261180-84267457     | rn_0d | rn_4d | OK | 2.11319 | 11.1093 | -2.74037 | 0.00613706  |
| <i>Slc7a10</i>  | -2.7247  | TCONS_00000721 | NM_053726      | chr1:92563399-92593301     | rn_0d | rn_4d | OK | 31.5179 | 4.76807 | 2.38071  | 0.0172791   |
| <i>Syt3</i>     | -2.22318 | TCONS_00000783 | NM_019122      | chr1:101459049-101473565   | rn_0d | rn_4d | OK | 16.5801 | 3.55095 | 2.24457  | 0.0247959   |
| <i>Napsa</i>    | 5.38587  | TCONS_00000789 | NM_031670      | chr1:101642883-101655189   | rn_0d | rn_4d | OK | 0.24111 | 10.0816 | -3.90154 | 9.56E-05    |
| <i>Kcnc3</i>    | -3.0018  | TCONS_00000791 | NM_053997      | chr1:101659055-101673260   | rn_0d | rn_4d | OK | 74.1296 | 9.25462 | 4.93964  | 7.83E-07    |
| <i>Kcnc1</i>    | -2.50801 | TCONS_00000854 | NM_012856      | chr1:103499688-103541771   | rn_0d | rn_4d | OK | 21.0069 | 3.69298 | 2.59164  | 0.00955191  |
| <i>Tmem86a</i>  | 3.30888  | TCONS_00000862 | NM_001135016   | chr1:104238666-104243017   | rn_0d | rn_4d | OK | 6.65283 | 65.9295 | -4.35396 | 1.34E-05    |

|                 |          |                |                   |                          |       |       |    |         |         |          |             |
|-----------------|----------|----------------|-------------------|--------------------------|-------|-------|----|---------|---------|----------|-------------|
| <i>Chs1</i>     | 2.29908  | TCONS_00000939 | NM_001106268      | chr1:128095352-128156150 | rn_0d | rn_4d | OK | 3.18678 | 15.6835 | -2.63628 | 0.00838195  |
| <i>Ctsc</i>     | 4.06157  | TCONS_00001121 | NM_017097         | chr1:158231170-158263682 | rn_0d | rn_4d | OK | 4.40659 | 73.5795 | -4.60478 | 4.13E-06    |
| <i>Prcp</i>     | 2.1834   | TCONS_00001141 | NM_001106281      | chr1:163944734-163993907 | rn_0d | rn_4d | OK | 9.00702 | 40.9118 | -3.3532  | 0.00079882  |
| <i>Plk1</i>     | 5.68048  | TCONS_00001471 | NM_017100         | chr1:199178261-199188238 | rn_0d | rn_4d | OK | 0.14182 | 7.27345 | -2.49608 | 0.0125573   |
| <i>I14r</i>     | 3.02568  | TCONS_00001499 | NM_133380         | chr1:203927940-203952929 | rn_0d | rn_4d | OK | 2.24411 | 18.2753 | -3.45435 | 0.000551616 |
| <i>Fam57b</i>   | -2.44957 | TCONS_00001515 | NM_001106296      | chr1:205239663-205246008 | rn_0d | rn_4d | OK | 40.0396 | 7.32986 | 3.50149  | 0.000462664 |
| <i>Sez612</i>   | -2.80457 | TCONS_00001519 | NM_001107550      | chr1:205340999-205383934 | rn_0d | rn_4d | OK | 34.5533 | 4.94573 | 2.83037  | 0.00464947  |
| <i>Itgal</i>    | 6.06675  | TCONS_00001527 | NM_001033998      | chr1:205742354-205780791 | rn_0d | rn_4d | OK | 0.39657 | 26.5824 | -4.73947 | 2.14E-06    |
| <i>Itgad</i>    | 5.08096  | TCONS_00001567 | NM_031691         | chr1:206632106-206669617 | rn_0d | rn_4d | OK | 0.02044 | 0.69181 | -3.77949 | 0.000157149 |
| <i>Ifitm1</i>   | 7.46105  | TCONS_00001684 | NM_001106314      | chr1:220687002-220689004 | rn_0d | rn_4d | OK | 2.43006 | 428.17  | -7.02002 | 2.22E-12    |
| <i>Efcab4a</i>  | 2.26899  | TCONS_00001692 | NM_001127541      | chr1:220920825-220926197 | rn_0d | rn_4d | OK | 0.89457 | 4.31169 | -2.65249 | 0.00798997  |
| <i>Efcab4a</i>  | 2.30247  | TCONS_00001713 | NM_001127541_dup1 | chr1:221357614-221362986 | rn_0d | rn_4d | OK | 0.89457 | 4.41291 | -2.69351 | 0.00707042  |
| <i>C1cf1</i>    | 3.03617  | TCONS_00001795 | NM_207615         | chr1:226338539-226342119 | rn_0d | rn_4d | OK | 0.24629 | 2.02035 | -2.8252  | 0.00472511  |
| <i>Rin1</i>     | 2.33927  | TCONS_00001812 | NM_139038         | chr1:227266339-227270986 | rn_0d | rn_4d | OK | 0.16136 | 0.81656 | -2.31436 | 0.0206479   |
| <i>Rin1</i>     | 2.33927  | TCONS_00001818 | NM_139038_dup1    | chr1:227359503-227364150 | rn_0d | rn_4d | OK | 0.16136 | 0.81656 | -2.31436 | 0.0206479   |
| <i>Efemp2</i>   | 2.91579  | TCONS_00001832 | NM_001277341      | chr1:227783414-227790741 | rn_0d | rn_4d | OK | 4.59076 | 34.6437 | -2.97611 | 0.00291933  |
| <i>Ms4a6b1</i>  | 4.81866  | TCONS_00001960 | NM_001006975      | chr1:234307344-234319170 | rn_0d | rn_4d | OK | 1.54542 | 43.6123 | -6.36905 | 1.90E-10    |
| <i>Ms4a6b1</i>  | 5.00122  | TCONS_00001962 | NM_001006975_dup1 | chr1:234821271-234833097 | rn_0d | rn_4d | OK | 1.23956 | 39.6996 | -6.47212 | 9.66E-11    |
| <i>Lpxn</i>     | 4.09669  | TCONS_00001990 | NM_001009649      | chr1:236792833-236827490 | rn_0d | rn_4d | OK | 1.49788 | 25.6274 | -3.20356 | 0.00135741  |
| <i>I133</i>     | 2.66209  | TCONS_00002083 | NM_001014166      | chr1:255363598-255397661 | rn_0d | rn_4d | OK | 10.8883 | 68.9171 | -3.58723 | 0.000334214 |
| <i>Kif11</i>    | 3.40718  | TCONS_00002125 | NM_001169112      | chr1:263519575-263570293 | rn_0d | rn_4d | OK | 0.62809 | 6.66325 | -4.51844 | 6.23E-06    |
| <i>Hhex</i>     | 2.72649  | TCONS_00002126 | NM_024385         | chr1:263583987-263589589 | rn_0d | rn_4d | OK | 1.26337 | 8.36156 | -2.78891 | 0.00528851  |
| <i>He11s</i>    | 2.08736  | TCONS_00002138 | NM_001106371      | chr1:265106338-265148860 | rn_0d | rn_4d | OK | 0.37765 | 1.60488 | -2.36848 | 0.0178613   |
| <i>He11s</i>    | 2.08736  | TCONS_00002139 | NM_001106371_dup1 | chr1:265357068-265399240 | rn_0d | rn_4d | OK | 0.37765 | 1.60488 | -2.36848 | 0.0178613   |
| <i>Ina</i>      | -2.29379 | TCONS_00002242 | NM_019128         | chr1:274212014-274224831 | rn_0d | rn_4d | OK | 58.3093 | 11.8915 | 3.2304   | 0.00123619  |
| <i>Abrac1</i>   | 2.40699  | TCONS_00002371 | NM_001099647      | chr1:14859229-14869661   | rn_0d | rn_4d | OK | 12.5443 | 66.5309 | -2.80649 | 0.00500839  |
| <i>Arhgap18</i> | 2.21015  | TCONS_00002388 | NM_001170575      | chr1:20730429-20964125   | rn_0d | rn_4d | OK | 2.49099 | 11.5264 | -2.0143  | 0.0439776   |
| <i>Ctgf</i>     | 2.10705  | TCONS_00002399 | NM_022266         | chr1:23331544-23334660   | rn_0d | rn_4d | OK | 15.3356 | 66.0672 | -3.39819 | 0.00067833  |
| <i>Vnn3</i>     | 2.90295  | TCONS_00002416 | NM_001109136      | chr1:24123624-24135887   | rn_0d | rn_4d | OK | 0.07177 | 0.53683 | -2.27996 | 0.0226104   |
| <i>Thbs2</i>    | 3.79898  | TCONS_00002557 | NM_001169138      | chr1:57842345-57871988   | rn_0d | rn_4d | OK | 3.55795 | 49.5231 | -4.82821 | 1.38E-06    |
| <i>Cox6b2</i>   | 2.51587  | TCONS_00002727 | NM_001039085      | chr1:75873034-75890658   | rn_0d | rn_4d | OK | 1.56142 | 8.93044 | -2.33238 | 0.0196807   |
| <i>Vasp</i>     | 2.0675   | TCONS_00002806 | NM_001108475      | chr1:81436921-81452864   | rn_0d | rn_4d | OK | 5.3309  | 22.345  | -2.39206 | 0.0167542   |
| <i>Apoc4</i>    | 4.55012  | TCONS_00002825 | NM_001109419      | chr1:81860927-81865186   | rn_0d | rn_4d | OK | 0.62397 | 14.6178 | -3.73731 | 0.000185996 |
| <i>Apoc1</i>    | 5.16397  | TCONS_00002827 | NM_001109996      | chr1:81872115-81875891   | rn_0d | rn_4d | OK | 7.73646 | 277.365 | -6.33467 | 2.38E-10    |
| <i>Bcl3</i>     | 5.20523  | TCONS_00002840 | NM_001109422      | chr1:81995864-82010428   | rn_0d | rn_4d | OK | 0.14626 | 5.39581 | -2.61695 | 0.00887194  |
| <i>Atp1a3</i>   | -2.25473 | TCONS_00002865 | NM_012506         | chr1:83104724-83133845   | rn_0d | rn_4d | OK | 378.99  | 79.412  | 3.58938  | 0.000331466 |
| <i>Kcnk6</i>    | 2.9453   | TCONS_00002954 | NM_053806         | chr1:88347072-88355439   | rn_0d | rn_4d | OK | 0.6608  | 5.08971 | -3.31012 | 0.000932548 |
| <i>Kcnk6</i>    | 2.9453   | TCONS_00002981 | NM_053806_dup1    | chr1:89343863-89352036   | rn_0d | rn_4d | OK | 0.6608  | 5.08971 | -3.31012 | 0.000932548 |
| <i>Fxyd5</i>    | 2.56626  | TCONS_00003034 | NM_001270688      | chr1:90620337-90629951   | rn_0d | rn_4d | OK | 12.1148 | 71.7524 | -2.8747  | 0.00404406  |
| <i>Cd37</i>     | 3.78412  | TCONS_00003166 | NM_017124         | chr1:102278663-102300660 | rn_0d | rn_4d | OK | 3.15709 | 43.4932 | -3.10157 | 0.00192499  |
| <i>Lin7b</i>    | -3.52986 | TCONS_00003171 | NM_021758         | chr1:102421969-102425010 | rn_0d | rn_4d | OK | 20.6166 | 1.78493 | 2.49688  | 0.0125292   |
| <i>Ft1</i>      | 2.09647  | TCONS_00003175 | NM_022500         | chr1:102527135-102528980 | rn_0d | rn_4d | OK | 328.844 | 1406.34 | -3.41541 | 0.00063685  |
| <i>Emp3</i>     | 2.78902  | TCONS_00003201 | NM_030847         | chr1:102979690-102982874 | rn_0d | rn_4d | OK | 11.751  | 81.218  | -3.47769 | 0.000505761 |
| <i>Abcc8</i>    | -2.19785 | TCONS_00003209 | NM_013039         | chr1:103194418-103275525 | rn_0d | rn_4d | OK | 3.84594 | 0.83827 | 2.36098  | 0.0182269   |
| <i>Mrgprx3</i>  | 3.54675  | TCONS_00003229 | NM_145787         | chr1:104361825-104387719 | rn_0d | rn_4d | OK | 0.47165 | 5.51185 | -3.25269 | 0.00114319  |

|                 |          |                |                |                          |       |       |    |         |         |          |             |
|-----------------|----------|----------------|----------------|--------------------------|-------|-------|----|---------|---------|----------|-------------|
| <i>Fes</i>      | 3.42739  | TCONS_00003372 | NM_001108488   | chr1:143127097-143136513 | rn_0d | rn_4d | OK | 1.01633 | 10.9341 | -3.36357 | 0.000769424 |
| <i>Nmb</i>      | -2.51853 | TCONS_00003383 | NM_001109149   | chr1:143673433-143676178 | rn_0d | rn_4d | OK | 2.56066 | 0.44689 | 2.30724  | 0.0210415   |
| <i>Bgn</i>      | 2.12711  | TCONS_00003461 | NM_017087      | chr1:153067989-153080152 | rn_0d | rn_4d | OK | 27.4964 | 120.116 | -3.62325 | 0.000290929 |
| <i>Thrsp</i>    | -2.72671 | TCONS_00003518 | NM_012703      | chr1:168587723-168592048 | rn_0d | rn_4d | OK | 30.4563 | 4.60106 | 3.72962  | 0.000191771 |
| <i>LOC68906</i> | 2.96829  | TCONS_00003640 | NM_001111269   | chr1:175098754-175100120 | rn_0d | rn_4d | OK | 20.697  | 161.976 | -4.28306 | 1.84E-05    |
| <i>Hbb-b1</i>   | 2.33001  | TCONS_00003641 | NM_198776      | chr1:175104277-175111738 | rn_0d | rn_4d | OK | 34.9011 | 175.485 | -3.5187  | 0.000433673 |
| <i>Hbb</i>      | 2.04903  | TCONS_00003643 | NM_033234      | chr1:175127945-175136083 | rn_0d | rn_4d | OK | 188.815 | 781.365 | -3.0071  | 0.00263756  |
| <i>Nlrp10</i>   | 4.14319  | TCONS_00003743 | NM_001106291   | chr1:180511614-180519172 | rn_0d | rn_4d | OK | 0.02793 | 0.49348 | -2.78106 | 0.00541816  |
| <i>Nupr1</i>    | 2.10356  | TCONS_00003859 | NM_053611      | chr1:201816732-201818768 | rn_0d | rn_4d | OK | 9.32835 | 40.0903 | -2.7717  | 0.00557642  |
| <i>Nupr1</i>    | 2.10356  | TCONS_00003893 | NM_053611_dup1 | chr1:205021876-205023912 | rn_0d | rn_4d | OK | 9.32835 | 40.0903 | -2.7717  | 0.00557642  |
| <i>Kif22</i>    | 3.22077  | TCONS_00003921 | NM_001009645   | chr1:205440606-205467625 | rn_0d | rn_4d | OK | 1.41957 | 13.2345 | -3.85023 | 0.000118006 |
| <i>Qprt</i>     | 2.33362  | TCONS_00003923 | NM_001009646   | chr1:205534749-205550041 | rn_0d | rn_4d | OK | 2.58939 | 13.0523 | -2.92813 | 0.00341013  |
| <i>Rgs10</i>    | 2.28136  | TCONS_00003962 | NM_019337      | chr1:206829263-206870605 | rn_0d | rn_4d | OK | 22.6839 | 110.274 | -3.16965 | 0.00152624  |
| <i>Cox8b</i>    | -3.30809 | TCONS_00004060 | NM_012786      | chr1:220574320-220575781 | rn_0d | rn_4d | OK | 2.76826 | 0.2795  | 1.99048  | 0.0465384   |
| <i>Ifitm2</i>   | 3.75837  | TCONS_00004061 | NM_030833      | chr1:220671381-220672562 | rn_0d | rn_4d | OK | 23.6958 | 320.665 | -5.55296 | 2.81E-08    |
| <i>Ctsd</i>     | 2.74369  | TCONS_00004106 | NM_134334      | chr1:222436921-222448798 | rn_0d | rn_4d | OK | 183.114 | 1226.46 | -4.00612 | 6.17E-05    |
| <i>Phlda2</i>   | 3.65708  | TCONS_00004122 | NM_001170480   | chr1:223562822-223563762 | rn_0d | rn_4d | OK | 0.08438 | 1.06448 | -2.10828 | 0.0350065   |
| <i>Ccnd1</i>    | 2.14824  | TCONS_00004147 | NM_171992      | chr1:224960135-224969658 | rn_0d | rn_4d | OK | 12.9404 | 57.3631 | -3.59567 | 0.000323552 |
| <i>Aldh3b1</i>  | 2.64601  | TCONS_00004162 | NM_001006998   | chr1:226018061-226038888 | rn_0d | rn_4d | OK | 1.66876 | 10.4453 | -3.21628 | 0.00129866  |
| <i>Rhod</i>     | 2.72258  | TCONS_00004183 | NM_001106323   | chr1:226536282-226550218 | rn_0d | rn_4d | OK | 0.15404 | 1.01671 | -2.38647 | 0.0170109   |
| <i>Ehbp111</i>  | 2.44505  | TCONS_00004234 | NM_001129997   | chr1:227997200-228017354 | rn_0d | rn_4d | OK | 1.63931 | 8.92682 | -2.82301 | 0.00475757  |
| <i>Anxa1</i>    | 3.60694  | TCONS_00004427 | NM_012904      | chr1:245192874-245209070 | rn_0d | rn_4d | OK | 7.68572 | 93.6442 | -5.01584 | 5.28E-07    |
| <i>Blnk</i>     | 3.42006  | TCONS_00004537 | NM_001025767   | chr1:267630219-267697917 | rn_0d | rn_4d | OK | 4.32645 | 46.3098 | -4.64842 | 3.34E-06    |
| <i>Calhm2</i>   | 3.03668  | TCONS_00004628 | NM_001008306   | chr1:274338777-274344504 | rn_0d | rn_4d | OK | 0.97543 | 8.00435 | -3.48056 | 0.00050037  |
| <i>RGD13115</i> | 2.15581  | TCONS_00004681 | NM_001079705   | chr1:287492665-287596785 | rn_0d | rn_4d | OK | 2.71109 | 12.0811 | -2.08522 | 0.0370495   |
| <i>Tekt5</i>    | -3.09138 | TCONS_00011852 | NM_001014224   | chr10:4175068-4211652    | rn_0d | rn_4d | OK | 0.62423 | 0.07324 | 2.36289  | 0.018133    |
| <i>Stk10</i>    | 3.00869  | TCONS_00012015 | NM_019206      | chr10:17316574-17409682  | rn_0d | rn_4d | OK | 2.99344 | 24.0922 | -4.61024 | 4.02E-06    |
| <i>Lcp2</i>     | 3.85742  | TCONS_00012024 | NM_130421      | chr10:18875178-18921944  | rn_0d | rn_4d | OK | 1.9967  | 28.941  | -5.52154 | 3.36E-08    |
| <i>Ifi47</i>    | 3.17065  | TCONS_00012071 | NM_172019      | chr10:34059617-34068963  | rn_0d | rn_4d | OK | 2.28598 | 20.5841 | -4.04833 | 5.16E-05    |
| <i>Gfpt2</i>    | 2.29119  | TCONS_00012096 | NM_001002819   | chr10:35051131-35097280  | rn_0d | rn_4d | OK | 0.83177 | 4.07116 | -2.32243 | 0.02021     |
| <i>Gm2a</i>     | 2.42065  | TCONS_00012186 | NM_172335      | chr10:40277004-40289541  | rn_0d | rn_4d | OK | 41.8162 | 223.888 | -4.11437 | 3.88E-05    |
| <i>LOC24906</i> | 2.64232  | TCONS_00012208 | NM_031537      | chr10:43664046-43672414  | rn_0d | rn_4d | OK | 0.17735 | 1.10727 | -2.43228 | 0.015004    |
| <i>Trpv2</i>    | 2.21865  | TCONS_00012290 | NM_001270797   | chr10:48686499-48707996  | rn_0d | rn_4d | OK | 4.17685 | 19.4415 | -2.59703 | 0.00940341  |
| <i>Trpv2</i>    | 4.70402  | TCONS_00012291 | NM_001270798   | chr10:48686499-48707996  | rn_0d | rn_4d | OK | 0.55966 | 14.5873 | -2.32048 | 0.0203148   |
| <i>Fam64a</i>   | 4.65526  | TCONS_00012442 | NM_001113781   | chr10:58354689-58359531  | rn_0d | rn_4d | OK | 0.46869 | 11.8102 | -5.29993 | 1.16E-07    |
| <i>Cc12</i>     | 5.96094  | TCONS_00012640 | NM_031530      | chr10:69047090-69048889  | rn_0d | rn_4d | OK | 0.75555 | 47.0632 | -6.68916 | 2.24E-11    |
| <i>Cc17</i>     | 4.69082  | TCONS_00012641 | NM_001007612   | chr10:69058108-69059959  | rn_0d | rn_4d | OK | 0.61557 | 15.8985 | -4.91289 | 8.97E-07    |
| <i>Cc112</i>    | 4.13681  | TCONS_00012643 | NM_001105822   | chr10:69111875-69113426  | rn_0d | rn_4d | OK | 0.09207 | 1.6196  | -2.49005 | 0.0127725   |
| <i>S1fn2</i>    | 3.18692  | TCONS_00012656 | NM_001107031   | chr10:70001018-70007628  | rn_0d | rn_4d | OK | 4.04423 | 36.8293 | -4.20611 | 2.60E-05    |
| <i>Scpepl</i>   | 2.85319  | TCONS_00012705 | NM_133383      | chr10:73846393-73880406  | rn_0d | rn_4d | OK | 16.447  | 118.846 | -4.30623 | 1.66E-05    |
| <i>Prr11</i>    | 3.52493  | TCONS_00012717 | NM_001108287   | chr10:75687184-75707021  | rn_0d | rn_4d | OK | 0.27667 | 3.18468 | -2.50729 | 0.0121661   |
| <i>Col1a1</i>   | 2.39378  | TCONS_00012759 | NM_053304      | chr10:82563433-82580364  | rn_0d | rn_4d | OK | 33.9151 | 178.234 | -3.9386  | 8.20E-05    |
| <i>Gngt2</i>    | 4.62925  | TCONS_00012776 | NM_001135767   | chr10:83459561-83462703  | rn_0d | rn_4d | OK | 0.86066 | 21.2997 | -2.83641 | 0.00456245  |
| <i>Cntnap1</i>  | -2.00188 | TCONS_00012906 | NM_032061      | chr10:88888135-88902111  | rn_0d | rn_4d | OK | 37.9243 | 9.46871 | 2.99642  | 0.00273166  |
| <i>Grn</i>      | 3.59016  | TCONS_00012944 | NM_017113      | chr10:90165633-90171738  | rn_0d | rn_4d | OK | 29.4315 | 354.453 | -5.84067 | 5.20E-09    |

|                 |                          |              |                           |       |       |    |          |          |           |              |
|-----------------|--------------------------|--------------|---------------------------|-------|-------|----|----------|----------|-----------|--------------|
| <i>FAM187A</i>  | 2. 20455 TCONS_00012952  | NM_001013861 | chr10:90761119-90762591   | rn_0d | rn_4d | OK | 1. 83956 | 8. 4791  | -2. 67495 | 0. 007474    |
| <i>Unc13d</i>   | 4. 76387 TCONS_00013073  | NM_138844    | chr10:103656551-103671443 | rn_0d | rn_4d | OK | 0. 10841 | 2. 94537 | -2. 56187 | 0. 010411    |
| <i>Cd3001e</i>  | 5. 60965 TCONS_00013115  | NM_001202463 | chr10:104711284-104721027 | rn_0d | rn_4d | OK | 0. 76863 | 37. 5307 | -4. 40203 | 1. 07E-05    |
| <i>Birc5</i>    | 3. 29668 TCONS_00013157  | NM_022274    | chr10:106494774-106503096 | rn_0d | rn_4d | OK | 1. 47657 | 14. 5096 | -3. 87615 | 0. 000106122 |
| <i>Slc16a3</i>  | 4. 16609 TCONS_00013226  | NM_030834    | chr10:109727314-109735890 | rn_0d | rn_4d | OK | 0. 47762 | 8. 57426 | -4. 81307 | 1. 49E-06    |
| <i>Metrn1</i>   | 2. 53126 TCONS_00013238  | NM_001014104 | chr10:110473723-110487807 | rn_0d | rn_4d | OK | 4. 86102 | 28. 1004 | -2. 93415 | 0. 00334459  |
| <i>Tnfrsf12</i> | 2. 10552 TCONS_00013340  | NM_181086    | chr10:12818948-12820975   | rn_0d | rn_4d | OK | 7. 62256 | 32. 8039 | -2. 81402 | 0. 00489265  |
| <i>Amdhd2</i>   | 3. 12538 TCONS_00013354  | NM_001024990 | chr10:13344148-13352861   | rn_0d | rn_4d | OK | 4. 29517 | 37. 4813 | -3. 84465 | 0. 000120723 |
| <i>Ms1n</i>     | 3. 55879 TCONS_00013413  | NM_031658    | chr10:14932447-14938109   | rn_0d | rn_4d | OK | 0. 49558 | 5. 84002 | -4. 1451  | 3. 40E-05    |
| <i>Nme4</i>     | 3. 1651 TCONS_00013443   | NM_001109478 | chr10:15275266-15279122   | rn_0d | rn_4d | OK | 1. 07379 | 9. 63185 | -3. 35254 | 0. 000800744 |
| <i>LOC28716</i> | 2. 94634 TCONS_00013450  | NM_001013853 | chr10:15472342-15473071   | rn_0d | rn_4d | OK | 3. 49643 | 26. 9502 | -3. 32511 | 0. 000883838 |
| <i>Hba2</i>     | 2. 27492 TCONS_00013451  | NM_001007722 | chr10:15484458-15485302   | rn_0d | rn_4d | OK | 113. 919 | 551. 334 | -3. 78003 | 0. 000156807 |
| <i>Hba1</i>     | 2. 11 TCONS_00013452     | NM_013096    | chr10:15497888-15498744   | rn_0d | rn_4d | OK | 187. 844 | 810. 903 | -3. 60379 | 0. 000313608 |
| <i>Gabra1</i>   | -2. 24096 TCONS_00013508 | NM_183326    | chr10:27154443-27209873   | rn_0d | rn_4d | OK | 10. 049  | 2. 12581 | 2. 36056  | 0. 0182471   |
| <i>Timd2</i>    | 6. 54957 TCONS_00013530  | NM_001013855 | chr10:31564995-31609835   | rn_0d | rn_4d | OK | 0. 0253  | 2. 37026 | -2. 883   | 0. 00393907  |
| <i>Irgm</i>     | 2. 33417 TCONS_00013535  | NM_001012007 | chr10:33997564-34005630   | rn_0d | rn_4d | OK | 1. 24089 | 6. 2573  | -2. 02565 | 0. 0428008   |
| <i>Ccdc69</i>   | 3. 92101 TCONS_00013616  | NM_001109031 | chr10:40231946-40257584   | rn_0d | rn_4d | OK | 0. 09612 | 1. 45594 | -2. 67974 | 0. 0073679   |
| <i>Cd68</i>     | 7. 52624 TCONS_00013812  | NM_001031638 | chr10:56014363-56016243   | rn_0d | rn_4d | OK | 1. 57917 | 291. 107 | -9. 99334 | 0            |
| <i>Tnfsf12</i>  | 2. 0046 TCONS_00013816   | NM_001001513 | chr10:56036417-56045715   | rn_0d | rn_4d | OK | 9. 2275  | 37. 0278 | -2. 85084 | 0. 00436038  |
| <i>Alox12</i>   | 3. 41788 TCONS_00013846  | NM_001105798 | chr10:56595325-56608169   | rn_0d | rn_4d | OK | 0. 28474 | 3. 04321 | -3. 04791 | 0. 0023044   |
| <i>Alox15</i>   | 2. 69404 TCONS_00013848  | NM_031010    | chr10:56704493-56713192   | rn_0d | rn_4d | OK | 0. 3924  | 2. 5393  | -2. 68655 | 0. 00721938  |
| <i>Cxc116</i>   | 3. 63649 TCONS_00013852  | NM_001017478 | chr10:56817241-56840312   | rn_0d | rn_4d | OK | 3. 2611  | 40. 556  | -4. 10264 | 4. 08E-05    |
| <i>Slfn13</i>   | 3. 44105 TCONS_00014031  | NM_001013970 | chr10:69956623-69973240   | rn_0d | rn_4d | OK | 1. 1945  | 12. 9731 | -2. 56771 | 0. 0102373   |
| <i>Cc19</i>     | 6. 87283 TCONS_00014040  | NM_001012357 | chr10:70416901-70421785   | rn_0d | rn_4d | OK | 0. 03525 | 4. 13118 | -4. 28137 | 1. 86E-05    |
| <i>Cc13</i>     | 4. 98631 TCONS_00014042  | NM_013025    | chr10:70501118-70518302   | rn_0d | rn_4d | OK | 0. 23957 | 7. 59386 | -3. 18804 | 0. 00143242  |
| <i>Abcc3</i>    | 3. 14173 TCONS_00014136  | NM_080581    | chr10:81879486-81938207   | rn_0d | rn_4d | OK | 0. 43255 | 3. 81764 | -2. 25685 | 0. 0240173   |
| <i>Eme1</i>     | 3. 54062 TCONS_00014154  | NM_001105830 | chr10:82185899-82191905   | rn_0d | rn_4d | OK | 0. 09594 | 1. 11648 | -3. 16829 | 0. 00153339  |
| <i>Ngfr</i>     | 2. 37028 TCONS_00014167  | NM_012610    | chr10:83198410-83216635   | rn_0d | rn_4d | OK | 2. 21249 | 11. 4395 | -3. 14433 | 0. 00166469  |
| <i>Abi3</i>     | 3. 03537 TCONS_00014169  | NM_001013118 | chr10:83448187-83459298   | rn_0d | rn_4d | OK | 1. 10067 | 9. 0239  | -2. 63018 | 0. 00853404  |
| <i>Slc4a1</i>   | 3. 04207 TCONS_00014344  | NM_012651    | chr10:90084738-90101181   | rn_0d | rn_4d | OK | 0. 0728  | 0. 59966 | -2. 94435 | 0. 00323635  |
| <i>Limd2</i>    | 2. 02567 TCONS_00014394  | NM_001025715 | chr10:94099469-94101864   | rn_0d | rn_4d | OK | 11. 1237 | 45. 2936 | -2. 38669 | 0. 0170006   |
| <i>Kpna2</i>    | 2. 29306 TCONS_00014420  | NM_001270802 | chr10:94940855-94952938   | rn_0d | rn_4d | OK | 5. 52058 | 27. 0561 | -2. 37248 | 0. 0176689   |
| <i>RGD15617</i> | 7. 8947 TCONS_00014464   | NM_001168284 | chr10:103216119-103364939 | rn_0d | rn_4d | OK | 0. 11682 | 27. 8013 | -2. 42841 | 0. 015165    |
| <i>RGD15594</i> | 7. 22581 TCONS_00014466  | NM_001168285 | chr10:103216119-103364939 | rn_0d | rn_4d | OK | 0. 3946  | 59. 0666 | -2. 78414 | 0. 0053669   |
| <i>Lgals3bp</i> | 2. 47004 TCONS_00014550  | NM_139096    | chr10:107050327-107059685 | rn_0d | rn_4d | OK | 13. 3136 | 73. 7654 | -3. 57673 | 0. 00034792  |
| <i>Sectm1b</i>  | 2. 56038 TCONS_00014617  | NM_199082    | chr10:109838187-109846753 | rn_0d | rn_4d | OK | 0. 25099 | 1. 48049 | -2. 38725 | 0. 016975    |
| <i>Parp14</i>   | 2. 1139 TCONS_00018788   | NM_001191659 | chr11:71194828-71227012   | rn_0d | rn_4d | OK | 1. 29691 | 5. 61383 | -2. 15252 | 0. 0313568   |
| <i>Gp5</i>      | -2. 64826 TCONS_00018838 | NM_012795    | chr11:77076190-77079283   | rn_0d | rn_4d | OK | 1. 22087 | 0. 19475 | 2. 56746  | 0. 0102446   |
| <i>Comt</i>     | 2. 03744 TCONS_00018935  | NM_012531    | chr11:89762304-89829567   | rn_0d | rn_4d | OK | 31. 261  | 128. 331 | -2. 97765 | 0. 00290467  |
| <i>Aifm3</i>    | -2. 73781 TCONS_00018952 | NM_001013977 | chr11:90415867-90432538   | rn_0d | rn_4d | OK | 12. 2303 | 1. 83347 | 2. 63905  | 0. 0083139   |
| <i>P2rx6</i>    | -3. 40034 TCONS_00018955 | NM_012721    | chr11:90486112-90501226   | rn_0d | rn_4d | OK | 11. 3166 | 1. 07179 | 2. 71931  | 0. 0065418   |
| <i>Cebpd</i>    | 3. 00189 TCONS_00018984  | NM_013154    | chr11:92069757-92070896   | rn_0d | rn_4d | OK | 4. 42805 | 35. 4709 | -3. 97003 | 7. 19E-05    |
| <i>Mis18a</i>   | 2. 5812 TCONS_00019043   | NM_001127523 | chr11:34491727-34504737   | rn_0d | rn_4d | OK | 0. 40829 | 2. 44333 | -2. 48062 | 0. 0131153   |
| <i>Rcan1</i>    | 2. 18218 TCONS_00019069  | NM_153724    | chr11:36145267-36224811   | rn_0d | rn_4d | OK | 7. 11994 | 32. 3131 | -2. 16548 | 0. 0303507   |
| <i>Plala</i>    | 2. 54511 TCONS_00019198  | NM_138882    | chr11:67157657-67203665   | rn_0d | rn_4d | OK | 2. 15651 | 12. 5865 | -2. 99088 | 0. 00278178  |

|                 |          |                |                   |                           |       |       |    |         |         |          |             |
|-----------------|----------|----------------|-------------------|---------------------------|-------|-------|----|---------|---------|----------|-------------|
| <i>Hc1s1</i>    | 3.89653  | TCONS_00019212 | NM_001011898      | chr11:69828260-69850286   | rn_0d | rn_4d | OK | 2.22107 | 33.0778 | -5.05564 | 4.29E-07    |
| <i>Stxbp2</i>   | 4.62646  | TCONS_00021064 | NM_031126         | chr12:4342229-4353949     | rn_0d | rn_4d | OK | 0.39747 | 9.81755 | -3.03591 | 0.00239813  |
| <i>RGD15653</i> | 7.17095  | TCONS_00021068 | NM_001134602      | chr12:4374152-4379850     | rn_0d | rn_4d | OK | 0.03539 | 5.09997 | -4.22085 | 2.43E-05    |
| <i>Serpine1</i> | 5.56456  | TCONS_00021257 | NM_012620         | chr12:24653384-24663763   | rn_0d | rn_4d | OK | 0.72033 | 34.0903 | -7.5527  | 4.26E-14    |
| <i>Limk1</i>    | -2.2203  | TCONS_00021293 | NM_031727         | chr12:27037249-27070939   | rn_0d | rn_4d | OK | 57.9892 | 12.4443 | 3.22594  | 0.00125559  |
| <i>Ncf1</i>     | 4.89314  | TCONS_00021303 | NM_053734         | chr12:27505739-27515002   | rn_0d | rn_4d | OK | 4.56313 | 135.596 | -6.47633 | 9.40E-11    |
| <i>Gusb</i>     | 3.36999  | TCONS_00021318 | NM_017015         | chr12:32139338-32152883   | rn_0d | rn_4d | OK | 3.4874  | 36.0553 | -4.28502 | 1.83E-05    |
| <i>Scarb1</i>   | 2.36021  | TCONS_00021343 | NM_031541         | chr12:38553338-38638465   | rn_0d | rn_4d | OK | 10.2349 | 52.5503 | -2.9855  | 0.00283119  |
| <i>Abcb9</i>    | -2.08016 | TCONS_00021362 | NM_022238         | chr12:39796336-39829246   | rn_0d | rn_4d | OK | 13.5672 | 3.20848 | 2.52662  | 0.0115166   |
| <i>Hpd</i>      | 3.50503  | TCONS_00021380 | NM_017233         | chr12:40729051-40740668   | rn_0d | rn_4d | OK | 0.13317 | 1.51196 | -3.13477 | 0.00171991  |
| <i>Rph3a</i>    | -2.26624 | TCONS_00021434 | NM_133518         | chr12:42904280-43014183   | rn_0d | rn_4d | OK | 24.765  | 5.14791 | 2.10495  | 0.0352961   |
| <i>Alox5ap</i>  | 2.25041  | TCONS_00021610 | NM_017260         | chr12:8950726-8974748     | rn_0d | rn_4d | OK | 5.02277 | 23.8993 | -2.65477 | 0.00793631  |
| <i>Ache</i>     | -2.13463 | TCONS_00021784 | NM_172009         | chr12:24484050-24492379   | rn_0d | rn_4d | OK | 55.1962 | 12.5696 | 2.17727  | 0.0294602   |
| <i>Aacs</i>     | -2.52158 | TCONS_00021879 | NM_023104         | chr12:38381584-38425067   | rn_0d | rn_4d | OK | 41.1162 | 7.16046 | 3.58517  | 0.000336865 |
| <i>P2rx4</i>    | 3.69754  | TCONS_00021926 | NM_031594         | chr12:41196777-41214804   | rn_0d | rn_4d | OK | 3.88891 | 50.4542 | -4.6692  | 3.02E-06    |
| <i>Slc24a6</i>  | 2.41078  | TCONS_00021976 | NM_001017488      | chr12:43421502-43444143   | rn_0d | rn_4d | OK | 2.75583 | 14.6544 | -2.47047 | 0.0134935   |
| <i>Galnt9</i>   | -2.15284 | TCONS_00022068 | NM_001122644      | chr12:53844712-53922236   | rn_0d | rn_4d | OK | 11.2447 | 2.5286  | 2.62825  | 0.00858258  |
| <i>Pole</i>     | 2.13604  | TCONS_00022073 | NM_001107152      | chr12:54138481-54187417   | rn_0d | rn_4d | OK | 0.38489 | 1.69178 | -2.0148  | 0.0439253   |
| <i>Serpinb1</i> | 4.08043  | TCONS_00023873 | NM_001107167      | chr13:32388014-32406429   | rn_0d | rn_4d | OK | 0.04015 | 0.67926 | -2.98386 | 0.0028464   |
| <i>Rab7b</i>    | 3.01239  | TCONS_00023940 | NM_001109328      | chr13:53528327-53554522   | rn_0d | rn_4d | OK | 3.63342 | 29.3181 | -2.93021 | 0.0033873   |
| <i>Ube2t</i>    | 4.63459  | TCONS_00024007 | NM_001108344      | chr13:56842244-56853343   | rn_0d | rn_4d | OK | 0.18243 | 4.53164 | -3.06048 | 0.00220985  |
| <i>Aspm</i>     | 3.54158  | TCONS_00024036 | NM_001105955      | chr13:61564058-61609831   | rn_0d | rn_4d | OK | 0.18927 | 2.20398 | -3.20939 | 0.00133018  |
| <i>Se1p</i>     | 6.24354  | TCONS_00024148 | NM_013114         | chr13:87318110-87344163   | rn_0d | rn_4d | OK | 0.01213 | 0.91924 | -3.87553 | 0.000106393 |
| <i>Creg1</i>    | 2.50407  | TCONS_00024164 | NM_001105966      | chr13:88849715-88864665   | rn_0d | rn_4d | OK | 10.6366 | 60.3397 | -3.65756 | 0.000254626 |
| <i>Fcgr3a</i>   | 3.84662  | TCONS_00024187 | NM_207603         | chr13:94025029-94035170   | rn_0d | rn_4d | OK | 3.68212 | 52.9718 | -4.85397 | 1.21E-06    |
| <i>Arhgap30</i> | 4.47839  | TCONS_00024206 | NM_001109077      | chr13:94402391-94423745   | rn_0d | rn_4d | OK | 0.22407 | 4.9947  | -2.74359 | 0.00607711  |
| <i>Slamf9</i>   | 5.82982  | TCONS_00024232 | NM_001105971      | chr13:95381995-95384776   | rn_0d | rn_4d | OK | 0.91318 | 51.9402 | -7.21673 | 5.32E-13    |
| <i>Tagln2</i>   | 2.66505  | TCONS_00024236 | NM_001013127      | chr13:95407076-95413997   | rn_0d | rn_4d | OK | 35.4975 | 225.143 | -4.41092 | 1.03E-05    |
| <i>Nek2</i>     | 3.35623  | TCONS_00024374 | NM_053691         | chr13:115071741-115084946 | rn_0d | rn_4d | OK | 0.42882 | 4.39142 | -3.83539 | 0.000125363 |
| <i>Cd34</i>     | 2.87808  | TCONS_00024390 | NM_001107202      | chr13:118239586-118258715 | rn_0d | rn_4d | OK | 2.42765 | 17.8473 | -3.68184 | 0.000231553 |
| <i>Cd34</i>     | 2.88406  | TCONS_00024395 | NM_001107202_dup1 | chr13:118532087-118551216 | rn_0d | rn_4d | OK | 2.42765 | 17.9216 | -3.6905  | 0.00022381  |
| <i>Mcm6</i>     | 2.69942  | TCONS_00024455 | NM_017287         | chr13:50127491-50152683   | rn_0d | rn_4d | OK | 2.35055 | 15.2678 | -3.78204 | 0.000155551 |
| <i>Cxcr4</i>    | 3.90142  | TCONS_00024457 | NM_022205         | chr13:50394127-50398032   | rn_0d | rn_4d | OK | 3.386   | 50.5977 | -5.43961 | 5.34E-08    |
| <i>Btg2</i>     | 2.04633  | TCONS_00024512 | NM_017259         | chr13:55966298-55970058   | rn_0d | rn_4d | OK | 4.70443 | 19.4318 | -2.90712 | 0.00364772  |
| <i>Ptprc</i>    | 4.09574  | TCONS_00024555 | NM_001109890      | chr13:60094037-60205338   | rn_0d | rn_4d | OK | 1.57108 | 26.862  | -5.19665 | 2.03E-07    |
| <i>Cfh</i>      | 2.87928  | TCONS_00024563 | NM_130409         | chr13:61997443-62095011   | rn_0d | rn_4d | OK | 11.6776 | 85.922  | -4.27164 | 1.94E-05    |
| <i>Ier5</i>     | 2.2779   | TCONS_00024612 | NM_001025137      | chr13:77677759-77679852   | rn_0d | rn_4d | OK | 4.67679 | 22.681  | -3.17821 | 0.00148187  |
| <i>Sft2d2</i>   | 2.78641  | TCONS_00024710 | NM_001034011      | chr13:88318013-88337483   | rn_0d | rn_4d | OK | 1.04382 | 7.20145 | -2.09788 | 0.0359158   |
| <i>Nuf2</i>     | 4.35196  | TCONS_00024734 | NM_001012028      | chr13:92449931-92486893   | rn_0d | rn_4d | OK | 0.36386 | 7.43023 | -2.96759 | 0.00300141  |
| <i>Fcr1b</i>    | 3.07788  | TCONS_00024749 | NM_001191931      | chr13:93898240-93903745   | rn_0d | rn_4d | OK | 0.14121 | 1.19236 | -2.59847 | 0.00936405  |
| <i>Fcgr2b</i>   | 3.62411  | TCONS_00024752 | NM_175756         | chr13:93966565-93983119   | rn_0d | rn_4d | OK | 3.25436 | 40.1267 | -3.5357  | 0.0004067   |
| <i>Fcer1g</i>   | 3.7625   | TCONS_00024757 | NM_001131001      | chr13:94228758-94233480   | rn_0d | rn_4d | OK | 29.806  | 404.509 | -5.22452 | 1.75E-07    |
| <i>Fcgr2a</i>   | 5.71717  | TCONS_00024788 | NM_053843         | chr13:95665161-95678334   | rn_0d | rn_4d | OK | 1.90948 | 100.451 | -5.6021  | 2.12E-08    |
| <i>LOC49827</i> | 4.96457  | TCONS_00024790 | NM_001135992      | chr13:95687141-95697538   | rn_0d | rn_4d | OK | 3.18214 | 99.358  | -7.01043 | 2.38E-12    |
| <i>LOC49827</i> | 5.28543  | TCONS_00024791 | NM_001135992_dup1 | chr13:95738131-95748528   | rn_0d | rn_4d | OK | 3.67082 | 143.164 | -7.50865 | 5.97E-14    |

|                 |          |                |                   |                           |       |       |    |         |         |          |             |
|-----------------|----------|----------------|-------------------|---------------------------|-------|-------|----|---------|---------|----------|-------------|
| <i>Hlx</i>      | 4.24004  | TCONS_00024875 | NM_001077674      | chr13:107315400-107320809 | rn_0d | rn_4d | OK | 0.40454 | 7.64431 | -4.76109 | 1.93E-06    |
| <i>Atf3</i>     | 3.75533  | TCONS_00024911 | NM_012912         | chr13:114411692-114468322 | rn_0d | rn_4d | OK | 1.37507 | 18.5692 | -4.55434 | 5.25E-06    |
| <i>Hpse</i>     | 2.63401  | TCONS_00026722 | NM_022605         | chr14:10483071-10523921   | rn_0d | rn_4d | OK | 1.84786 | 11.4706 | -3.20603 | 0.00134581  |
| <i>Naaa</i>     | 2.5611   | TCONS_00026768 | NM_001010967      | chr14:17199738-17218991   | rn_0d | rn_4d | OK | 7.26286 | 42.8623 | -3.76151 | 0.000168887 |
| <i>Spink2</i>   | 4.89655  | TCONS_00026832 | NM_001008870      | chr14:33038332-33044841   | rn_0d | rn_4d | OK | 0.05293 | 1.57656 | -2.18916 | 0.028585    |
| <i>Tec</i>      | 3.12724  | TCONS_00026857 | NM_053432         | chr14:37729489-37838226   | rn_0d | rn_4d | OK | 1.27419 | 11.1334 | -3.5735  | 0.000352248 |
| <i>Slc2a9</i>   | 4.75745  | TCONS_00026965 | NM_001191551      | chr14:77061785-77174290   | rn_0d | rn_4d | OK | 0.14526 | 3.92891 | -3.92674 | 8.61E-05    |
| <i>Htra3</i>    | 2.14056  | TCONS_00026988 | NM_001271027      | chr14:79875404-79903558   | rn_0d | rn_4d | OK | 5.94032 | 26.1929 | -2.66361 | 0.00773062  |
| <i>Zfyve28</i>  | -2.5355  | TCONS_00027010 | NM_001107227      | chr14:82412058-82497078   | rn_0d | rn_4d | OK | 6.51239 | 1.12326 | 2.76468  | 0.00569794  |
| <i>Pla2g3</i>   | -2.34738 | TCONS_00027048 | NM_001106015      | chr14:84412831-84418680   | rn_0d | rn_4d | OK | 14.9355 | 2.93486 | 2.55687  | 0.0105619   |
| <i>Plek</i>     | 2.35733  | TCONS_00027130 | NM_001025750      | chr14:100353684-100386531 | rn_0d | rn_4d | OK | 3.32964 | 17.0617 | -2.78673 | 0.00532426  |
| <i>Ephx4</i>    | -3.13709 | TCONS_00027214 | NM_001105994      | chr14:3364192-3393588     | rn_0d | rn_4d | OK | 5.43796 | 0.61813 | 2.45474  | 0.0140987   |
| <i>Spp1</i>     | 3.0238   | TCONS_00027248 | NM_012881         | chr14:6653085-6658937     | rn_0d | rn_4d | OK | 128.97  | 1048.92 | -4.26996 | 1.96E-05    |
| <i>Anxa3</i>    | 2.04172  | TCONS_00027284 | NM_012823         | chr14:14313645-14368162   | rn_0d | rn_4d | OK | 10.6791 | 43.9695 | -2.54893 | 0.0108055   |
| <i>Cxc12</i>    | 3.45083  | TCONS_00027310 | NM_053647         | chr14:18640311-18642357   | rn_0d | rn_4d | OK | 0.08994 | 0.98349 | -2.27166 | 0.023107    |
| <i>Cxc11</i>    | 4.65518  | TCONS_00027311 | NM_030845         | chr14:18653031-18655163   | rn_0d | rn_4d | OK | 0.16943 | 4.26918 | -3.50534 | 0.000456023 |
| <i>Pf4</i>      | 4.79736  | TCONS_00027313 | NM_001007729      | chr14:18758102-18759063   | rn_0d | rn_4d | OK | 4.52813 | 125.912 | -3.82912 | 0.000128604 |
| <i>Rhoh</i>     | 3.73807  | TCONS_00027417 | NM_001013430      | chr14:43781205-43836120   | rn_0d | rn_4d | OK | 0.29621 | 3.95253 | -3.53314 | 0.000410649 |
| <i>Bst1</i>     | 5.55059  | TCONS_00027482 | NM_030848         | chr14:71827039-71843340   | rn_0d | rn_4d | OK | 0.1847  | 8.6569  | -5.29311 | 1.20E-07    |
| <i>Adra2c</i>   | -2.15284 | TCONS_00027540 | NM_138506         | chr14:81422129-81423833   | rn_0d | rn_4d | OK | 5.74768 | 1.29248 | 2.49543  | 0.0125806   |
| <i>Tacc3</i>    | 3.71257  | TCONS_00027571 | NM_001004424      | chr14:83025668-83039461   | rn_0d | rn_4d | OK | 0.48852 | 6.4044  | -2.19515 | 0.0281526   |
| <i>Cabp7</i>    | -2.08796 | TCONS_00027610 | NM_001007730      | chr14:85614854-85655131   | rn_0d | rn_4d | OK | 59.6999 | 14.0422 | 3.29285  | 0.000991766 |
| <i>Nefh</i>     | -2.50701 | TCONS_00027613 | NM_012607         | chr14:85859192-85869178   | rn_0d | rn_4d | OK | 260.718 | 45.8653 | 3.58747  | 0.000333898 |
| <i>Anxa7</i>    | 2.01251  | TCONS_00029724 | NM_130416         | chr15:8355755-8383587     | rn_0d | rn_4d | OK | 8.85362 | 35.7228 | -2.0728  | 0.0381909   |
| <i>Lgals3</i>   | 3.74809  | TCONS_00029803 | NM_031832         | chr15:28094343-28106279   | rn_0d | rn_4d | OK | 43.3754 | 582.815 | -6.04428 | 1.50E-09    |
| <i>Ar111</i>    | 4.93235  | TCONS_00029969 | NM_001013433      | chr15:45448922-45451424   | rn_0d | rn_4d | OK | 0.99486 | 30.3772 | -4.30032 | 1.71E-05    |
| <i>Nefm</i>     | -2.25716 | TCONS_00029975 | NM_017029         | chr15:46736795-46741631   | rn_0d | rn_4d | OK | 461.759 | 96.5925 | 3.21626  | 0.00129873  |
| <i>Cdca2</i>    | 2.65582  | TCONS_00029977 | NM_001107273      | chr15:47185947-47231365   | rn_0d | rn_4d | OK | 0.19304 | 1.21653 | -2.20919 | 0.0271616   |
| <i>Ctsb</i>     | 2.20728  | TCONS_00030001 | NM_022597         | chr15:50081534-50102407   | rn_0d | rn_4d | OK | 186.868 | 862.963 | -3.2224  | 0.00127121  |
| <i>Phyhip</i>   | -2.00518 | TCONS_00030033 | NM_001017376_dup1 | chr15:55872253-55883800   | rn_0d | rn_4d | OK | 13.4946 | 3.36157 | 2.79539  | 0.00518371  |
| <i>Phyhip</i>   | -2.00518 | TCONS_00030045 | NM_001017376      | chr15:56490751-56502001   | rn_0d | rn_4d | OK | 13.4946 | 3.36157 | 2.79539  | 0.00518371  |
| <i>Epsti1</i>   | 3.62136  | TCONS_00030075 | NM_001044257      | chr15:63762908-63865564   | rn_0d | rn_4d | OK | 1.93416 | 23.8029 | -4.88774 | 1.02E-06    |
| <i>Plau</i>     | 6.26004  | TCONS_00030175 | NM_013085         | chr15:3621056-3627772     | rn_0d | rn_4d | OK | 0.4139  | 31.7215 | -6.67384 | 2.49E-11    |
| <i>Tep1</i>     | 2.18976  | TCONS_00030292 | NM_022591         | chr15:31583610-31631251   | rn_0d | rn_4d | OK | 2.66283 | 12.1486 | -2.91714 | 0.00353259  |
| <i>Slc7a7</i>   | 4.83633  | TCONS_00030335 | NM_031341         | chr15:36894260-36945586   | rn_0d | rn_4d | OK | 0.52494 | 14.9967 | -4.4678  | 7.90E-06    |
| <i>Haus4</i>    | 2.06888  | TCONS_00030338 | NM_001013995      | chr15:37067370-37078907   | rn_0d | rn_4d | OK | 2.81057 | 11.792  | -2.47595 | 0.0132884   |
| <i>Ripk3</i>    | 4.37057  | TCONS_00030385 | NM_139342         | chr15:38358405-38390939   | rn_0d | rn_4d | OK | 0.37578 | 7.77331 | -2.04754 | 0.040605    |
| <i>Bmp1</i>     | 2.93501  | TCONS_00030545 | NM_031323         | chr15:55889917-55934296   | rn_0d | rn_4d | OK | 1.97462 | 15.1011 | -2.3112  | 0.020822    |
| <i>RGD15611</i> | 2.42139  | TCONS_00032486 | NM_001134605      | chr16:10987768-11019053   | rn_0d | rn_4d | OK | 0.57728 | 3.09245 | -2.25631 | 0.024051    |
| <i>Jak3</i>     | 3.3604   | TCONS_00032543 | NM_012855         | chr16:19967319-19981129   | rn_0d | rn_4d | OK | 1.0205  | 10.4808 | -3.07054 | 0.00213672  |
| <i>Ifi30</i>    | 4.07161  | TCONS_00032560 | NM_001030026      | chr16:20283633-20287840   | rn_0d | rn_4d | OK | 11.5349 | 193.95  | -5.61737 | 1.94E-08    |
| <i>Cldn23</i>   | 3.99862  | TCONS_00032684 | NM_001033062      | chr16:59664247-59665972   | rn_0d | rn_4d | OK | 0.02992 | 0.4783  | -2.40164 | 0.0163219   |
| <i>Htra4</i>    | 3.09771  | TCONS_00032760 | NM_001107321      | chr16:71438258-71451530   | rn_0d | rn_4d | OK | 0.05746 | 0.49185 | -2.44742 | 0.0143882   |
| <i>Ckap2</i>    | 4.77509  | TCONS_00032787 | NM_001169139      | chr16:74383669-74410206   | rn_0d | rn_4d | OK | 0.4386  | 12.0093 | -4.5895  | 4.44E-06    |
| <i>LOC29059</i> | 2.17429  | TCONS_00032960 | NM_001106063      | chr16:14255515-14263122   | rn_0d | rn_4d | OK | 0.74718 | 3.3725  | -2.23213 | 0.0256066   |

|                 |          |                |                   |                         |       |       |    |         |         |          |             |
|-----------------|----------|----------------|-------------------|-------------------------|-------|-------|----|---------|---------|----------|-------------|
| <i>Rab3a</i>    | -2.10005 | TCONS_00033029 | NM_013018         | chr16:20289806-20296274 | rn_0d | rn_4d | OK | 204.025 | 47.5889 | 3.23767  | 0.00120511  |
| <i>Hapln4</i>   | -2.90612 | TCONS_00033064 | NM_001108398      | chr16:20931164-20939015 | rn_0d | rn_4d | OK | 28.1896 | 3.76064 | 4.28751  | 1.81E-05    |
| <i>Hapln4</i>   | -2.91112 | TCONS_00033066 | NM_001108398_dup1 | chr16:20994298-21005078 | rn_0d | rn_4d | OK | 28.2875 | 3.76064 | 4.29518  | 1.75E-05    |
| <i>Hmgb2</i>    | 2.73033  | TCONS_00033124 | NM_017187         | chr16:35886763-35889338 | rn_0d | rn_4d | OK | 10.0463 | 66.6681 | -4.02076 | 5.80E-05    |
| <i>Dctd</i>     | 2.7374   | TCONS_00033138 | NM_001013882      | chr16:46903565-46933233 | rn_0d | rn_4d | OK | 1.01017 | 6.73647 | -2.00557 | 0.044902    |
| <i>Eif4ebp1</i> | 2.92135  | TCONS_00033218 | NM_053857         | chr16:68580262-68593808 | rn_0d | rn_4d | OK | 4.60476 | 34.8835 | -3.74916 | 0.000177428 |
| <i>F10</i>      | 4.30771  | TCONS_00033327 | NM_017143         | chr16:81288535-81307922 | rn_0d | rn_4d | OK | 0.13733 | 2.7196  | -2.57734 | 0.00995653  |
| <i>Ct1a2a</i>   | 4.47725  | TCONS_00034990 | NM_001109115      | chr17:6397332-6401233   | rn_0d | rn_4d | OK | 0.40486 | 9.01749 | -2.14566 | 0.0319004   |
| <i>Dok3</i>     | 4.22747  | TCONS_00035045 | NM_001107336      | chr17:11747758-11752826 | rn_0d | rn_4d | OK | 0.71329 | 13.3617 | -3.05353 | 0.00226168  |
| <i>Pdlim7</i>   | 2.5573   | TCONS_00035049 | NM_173125         | chr17:11762072-11777443 | rn_0d | rn_4d | OK | 3.38683 | 19.935  | -1.96812 | 0.0490543   |
| <i>Sncb</i>     | -2.19617 | TCONS_00035064 | NM_080777         | chr17:12510520-12518728 | rn_0d | rn_4d | OK | 174.874 | 38.1604 | 3.64764  | 0.00026466  |
| <i>Pxdc1</i>    | 2.06071  | TCONS_00035190 | NM_001025719      | chr17:32864967-32893958 | rn_0d | rn_4d | OK | 6.12919 | 25.5705 | -2.48859 | 0.0128251   |
| <i>Hist1h2b</i> | 3.58775  | TCONS_00035337 | NM_001109400      | chr17:58942756-58943137 | rn_0d | rn_4d | OK | 0.19189 | 2.3071  | -2.1305  | 0.0331301   |
| <i>Echdc3</i>   | 2.31197  | TCONS_00035391 | NM_001101010      | chr17:77652352-77675480 | rn_0d | rn_4d | OK | 0.21151 | 1.05026 | -2.07676 | 0.0378234   |
| <i>Vim</i>      | 2.81166  | TCONS_00035419 | NM_031140         | chr17:82500658-82509383 | rn_0d | rn_4d | OK | 101.712 | 714.113 | -3.69542 | 0.000219524 |
| <i>Mrc1</i>     | 4.32905  | TCONS_00035421 | NM_001106123      | chr17:83099418-83180716 | rn_0d | rn_4d | OK | 0.62913 | 12.6448 | -3.56823 | 0.000359401 |
| <i>Grk6</i>     | 2.04445  | TCONS_00035536 | NM_031657         | chr17:11814900-11830526 | rn_0d | rn_4d | OK | 3.55832 | 14.6787 | -2.05134 | 0.0402335   |
| <i>S1pr3</i>    | 2.01782  | TCONS_00035575 | NM_001271143      | chr17:15871250-15884616 | rn_0d | rn_4d | OK | 3.78593 | 15.332  | -2.69443 | 0.00705088  |
| <i>Nin1</i>     | 2.7093   | TCONS_00035597 | NM_012867         | chr17:17930058-17945126 | rn_0d | rn_4d | OK | 14.8881 | 97.3688 | -4.04811 | 5.16E-05    |
| <i>Edn1</i>     | 2.36897  | TCONS_00035622 | NM_012548         | chr17:24118008-24124009 | rn_0d | rn_4d | OK | 0.97899 | 5.05723 | -2.74125 | 0.00612063  |
| <i>Nrn1</i>     | -2.55081 | TCONS_00035650 | NM_053346         | chr17:29834673-29877118 | rn_0d | rn_4d | OK | 35.8443 | 6.11715 | 3.50926  | 0.000449351 |
| <i>Ly86</i>     | 3.16717  | TCONS_00035652 | NM_001106128      | chr17:30007744-30080876 | rn_0d | rn_4d | OK | 3.44836 | 30.976  | -4.13838 | 3.50E-05    |
| <i>Ripk1</i>    | 2.43133  | TCONS_00035665 | NM_001107350      | chr17:33429984-33462906 | rn_0d | rn_4d | OK | 1.57931 | 8.51864 | -2.28028 | 0.0225908   |
| <i>Mboat1</i>   | 4.0129   | TCONS_00035679 | NM_001109120      | chr17:37374237-37486374 | rn_0d | rn_4d | OK | 1.01858 | 16.4437 | -3.59011 | 0.000330538 |
| <i>Chrm3</i>    | -2.42389 | TCONS_00035805 | NM_012527         | chr17:65753664-66217211 | rn_0d | rn_4d | OK | 2.68128 | 0.49967 | 2.56614  | 0.0102838   |
| <i>Apbb1ip</i>  | 2.51841  | TCONS_00035917 | NM_001100577      | chr17:91762063-91812346 | rn_0d | rn_4d | OK | 3.47119 | 19.8881 | -3.37308 | 0.000743323 |
| <i>MGC10556</i> | 2.09458  | TCONS_00037995 | NM_001024284      | chr18:54920889-54939120 | rn_0d | rn_4d | OK | 0.5769  | 2.46396 | -2.40933 | 0.0159817   |
| <i>Cidea</i>    | 2.16719  | TCONS_00038053 | NM_001170467      | chr18:62268024-62292644 | rn_0d | rn_4d | OK | 2.49061 | 11.1866 | -2.47786 | 0.0132174   |
| <i>Tmem173</i>  | 2.56685  | TCONS_00038276 | NM_001109122      | chr18:28242118-28248371 | rn_0d | rn_4d | OK | 1.49189 | 8.83964 | -2.87682 | 0.00401698  |
| <i>Cd14</i>     | 3.46734  | TCONS_00038293 | NM_021744         | chr18:29265350-29266946 | rn_0d | rn_4d | OK | 2.33092 | 25.781  | -4.59493 | 4.33E-06    |
| <i>Gnpdal</i>   | 2.52093  | TCONS_00038314 | NM_001134995      | chr18:31157708-31167746 | rn_0d | rn_4d | OK | 9.48999 | 54.4681 | -3.84716 | 0.000119497 |
| <i>Ppic</i>     | 2.74058  | TCONS_00038358 | NM_001004215      | chr18:47585433-47598040 | rn_0d | rn_4d | OK | 5.19425 | 34.7152 | -3.78712 | 0.000152401 |
| <i>Smim3</i>    | 2.42214  | TCONS_00038375 | NM_173126         | chr18:54978250-55023659 | rn_0d | rn_4d | OK | 4.14604 | 22.2213 | -2.77286 | 0.00555667  |
| <i>Ces5a</i>    | -2.30603 | TCONS_00040096 | NM_001012056      | chr19:23219489-23258836 | rn_0d | rn_4d | OK | 0.73641 | 0.14891 | 2.09854  | 0.0358573   |
| <i>Hmox1</i>    | 5.46781  | TCONS_00040104 | NM_012580         | chr19:25622555-25629377 | rn_0d | rn_4d | OK | 6.31633 | 279.536 | -7.8963  | 2.89E-15    |
| <i>Asf1b</i>    | 4.14107  | TCONS_00040180 | NM_001107160      | chr19:36055966-36070506 | rn_0d | rn_4d | OK | 0.39692 | 7.00306 | -4.50349 | 6.68E-06    |
| <i>Cacna1a</i>  | -2.02729 | TCONS_00040198 | NM_012918         | chr19:36502302-36727039 | rn_0d | rn_4d | OK | 8.35324 | 2.04918 | 2.2875   | 0.0221669   |
| <i>Dnase2</i>   | 3.60065  | TCONS_00040207 | NM_138539         | chr19:36998477-37001146 | rn_0d | rn_4d | OK | 8.60363 | 104.372 | -5.30027 | 1.16E-07    |
| <i>Man2b1</i>   | 2.16546  | TCONS_00040225 | NM_199404         | chr19:37172459-37191891 | rn_0d | rn_4d | OK | 11.5264 | 51.7084 | -3.09807 | 0.00194786  |
| <i>Nrn11</i>    | -2.08345 | TCONS_00040298 | NM_001135006      | chr19:48731783-48733244 | rn_0d | rn_4d | OK | 4.85754 | 1.14614 | 2.12927  | 0.0332316   |
| <i>Pla2g15</i>  | 2.68594  | TCONS_00040308 | NM_001004277      | chr19:48996108-49013716 | rn_0d | rn_4d | OK | 2.93922 | 18.9138 | -2.96675 | 0.00300966  |
| <i>Calb2</i>    | -2.40593 | TCONS_00040343 | NM_053988         | chr19:52310582-52337705 | rn_0d | rn_4d | OK | 75.5134 | 14.2484 | 3.28147  | 0.00103266  |
| <i>Plcg2</i>    | 2.8262   | TCONS_00040407 | NM_017168         | chr19:60828450-60962641 | rn_0d | rn_4d | OK | 0.51756 | 3.67056 | -3.06181 | 0.00220001  |
| <i>Necab2</i>   | -2.55638 | TCONS_00040417 | NM_133415         | chr19:62834864-62861145 | rn_0d | rn_4d | OK | 14.8768 | 2.52907 | 2.5563   | 0.0105792   |
| <i>Cdt1</i>     | 2.09254  | TCONS_00040450 | NM_001106192      | chr19:66090080-66095027 | rn_0d | rn_4d | OK | 0.86509 | 3.68959 | -2.23506 | 0.0254136   |

|                 |          |                |              |                          |       |       |    |         |         |          |             |
|-----------------|----------|----------------|--------------|--------------------------|-------|-------|----|---------|---------|----------|-------------|
| <i>Spire2</i>   | -2.13768 | TCONS_00040469 | NM_001127538 | chr19:66847907-66886394  | rn_0d | rn_4d | OK | 14.1819 | 3.22276 | 2.92833  | 0.00340785  |
| <i>Car7</i>     | -3.7093  | TCONS_00040522 | NM_001106165 | chr19:630355-639727      | rn_0d | rn_4d | OK | 3.41542 | 0.26112 | 3.04084  | 0.00235917  |
| <i>Cmtm3</i>    | 3.63863  | TCONS_00040524 | NM_001106164 | chr19:829210-836117      | rn_0d | rn_4d | OK | 1.97952 | 24.6545 | -4.30581 | 1.66E-05    |
| <i>Ck1f</i>     | 2.36732  | TCONS_00040527 | NM_139111    | chr19:907065-915792      | rn_0d | rn_4d | OK | 2.45067 | 12.645  | -2.42705 | 0.0152221   |
| <i>Ndrg4</i>    | -2.16843 | TCONS_00040536 | NM_031967    | chr19:9751516-9787020    | rn_0d | rn_4d | OK | 281.18  | 62.5493 | 3.0325   | 0.00242538  |
| <i>Mt1a</i>     | 3.10151  | TCONS_00040584 | NM_138826    | chr19:11277132-11278149  | rn_0d | rn_4d | OK | 31.2388 | 268.127 | -4.32305 | 1.54E-05    |
| <i>Mt2A</i>     | 2.41536  | TCONS_00040585 | NM_001137564 | chr19:11283092-11283867  | rn_0d | rn_4d | OK | 104.506 | 557.487 | -3.75929 | 0.000170396 |
| <i>Mmp2</i>     | 2.19634  | TCONS_00040599 | NM_031054    | chr19:26629727-26658966  | rn_0d | rn_4d | OK | 8.47718 | 38.8522 | -3.47727 | 0.000506551 |
| <i>MAST1</i>    | -2.23085 | TCONS_00040689 | NM_181089    | chr19:37001474-37037658  | rn_0d | rn_4d | OK | 8.11203 | 1.72813 | 2.17975  | 0.029276    |
| <i>Fhod1</i>    | 3.28117  | TCONS_00040729 | NM_001191600 | chr19:48150420-48169238  | rn_0d | rn_4d | OK | 0.88874 | 8.63984 | -3.02992 | 0.00244622  |
| <i>Cyba</i>     | 4.00495  | TCONS_00040881 | NM_024160    | chr19:65959817-65967224  | rn_0d | rn_4d | OK | 10.2439 | 164.465 | -5.63953 | 1.71E-08    |
| <i>Mvd</i>      | -2.00218 | TCONS_00040882 | NM_031062    | chr19:65968309-65978333  | rn_0d | rn_4d | OK | 47.9454 | 11.9683 | 3.0352   | 0.00240375  |
| <i>Fam38a</i>   | 2.57662  | TCONS_00040887 | NM_001077200 | chr19:66009916-66075869  | rn_0d | rn_4d | OK | 1.31591 | 7.84991 | -2.48952 | 0.0127917   |
| <i>Esm1</i>     | 2.78328  | TCONS_00042745 | NM_022604    | chr2:64137198-64145937   | rn_0d | rn_4d | OK | 2.18653 | 15.0524 | -3.67979 | 0.000233422 |
| <i>Hmgcs1</i>   | -2.58273 | TCONS_00042769 | NM_017268    | chr2:70791143-70809191   | rn_0d | rn_4d | OK | 230.438 | 38.4659 | 3.0875   | 0.00201845  |
| <i>Dap</i>      | 2.40508  | TCONS_00042878 | NM_022526    | chr2:103949820-104003059 | rn_0d | rn_4d | OK | 13.1332 | 69.562  | -3.71549 | 0.000202812 |
| <i>Cp</i>       | 3.24526  | TCONS_00042940 | NM_012532    | chr2:124467561-124551506 | rn_0d | rn_4d | OK | 3.26365 | 30.9474 | -2.40548 | 0.0161513   |
| <i>Mgst2</i>    | 5.11391  | TCONS_00043071 | NM_001106430 | chr2:160171725-160202890 | rn_0d | rn_4d | OK | 0.67366 | 23.3281 | -3.00376 | 0.0026667   |
| <i>Postn</i>    | 4.16583  | TCONS_00043084 | NM_001108550 | chr2:163331135-163362444 | rn_0d | rn_4d | OK | 1.34262 | 24.0985 | -4.27774 | 1.89E-05    |
| <i>Ptx3</i>     | 3.1196   | TCONS_00043130 | NM_001109536 | chr2:177231296-177513886 | rn_0d | rn_4d | OK | 0.3086  | 2.68214 | -2.04526 | 0.0408297   |
| <i>Fam198b</i>  | 3.14391  | TCONS_00043156 | NM_199105    | chr2:198087636-198160605 | rn_0d | rn_4d | OK | 3.05802 | 27.0303 | -3.50016 | 0.000464981 |
| <i>Crabp2</i>   | 2.64801  | TCONS_00043209 | NM_017244    | chr2:206725432-206729779 | rn_0d | rn_4d | OK | 6.1924  | 38.8142 | -3.16493 | 0.0015512   |
| <i>RGD13031</i> | 2.20586  | TCONS_00043223 | NM_001004226 | chr2:207100470-207104061 | rn_0d | rn_4d | OK | 19.1839 | 88.5048 | -3.49134 | 0.000480599 |
| <i>Shc1</i>     | 2.0474   | TCONS_00043262 | NM_053517    | chr2:208159785-208171348 | rn_0d | rn_4d | OK | 4.64117 | 19.1847 | -1.99083 | 0.0464993   |
| <i>Shc1</i>     | 3.38948  | TCONS_00043263 | NM_001164060 | chr2:208159785-208171348 | rn_0d | rn_4d | OK | 3.21834 | 33.7262 | -3.75695 | 0.000171997 |
| <i>S100a4</i>   | 2.46754  | TCONS_00043304 | NM_012618    | chr2:209431372-209433679 | rn_0d | rn_4d | OK | 69.0026 | 381.652 | -3.9437  | 8.02E-05    |
| <i>Slc25a24</i> | 2.09146  | TCONS_00043538 | NM_001127544 | chr2:231401321-231438559 | rn_0d | rn_4d | OK | 2.0445  | 8.71324 | -2.33256 | 0.0196712   |
| <i>Tifa</i>     | 2.27112  | TCONS_00043608 | NM_001014044 | chr2:251472400-251482345 | rn_0d | rn_4d | OK | 4.64325 | 22.4129 | -2.80674 | 0.00500463  |
| <i>Gbp2</i>     | 2.26993  | TCONS_00043682 | NM_133624    | chr2:266805233-266821133 | rn_0d | rn_4d | OK | 5.43773 | 26.2262 | -3.39761 | 0.000679775 |
| <i>Gpr150</i>   | -2.31148 | TCONS_00043765 | NM_001109173 | chr2:2810577-2813345     | rn_0d | rn_4d | OK | 1.98452 | 0.39979 | 1.9827   | 0.0474008   |
| <i>Ckmt2</i>    | -3.34556 | TCONS_00043789 | NM_001127652 | chr2:40627923-40657402   | rn_0d | rn_4d | OK | 0.41268 | 0.0406  | 2.01303  | 0.0441116   |
| <i>Thbs4</i>    | 2.74991  | TCONS_00043800 | NM_017133    | chr2:41549114-41591101   | rn_0d | rn_4d | OK | 1.71018 | 11.504  | -3.78313 | 0.000154869 |
| <i>Crhbp</i>    | -2.08986 | TCONS_00043815 | NM_139183    | chr2:44299506-44311225   | rn_0d | rn_4d | OK | 1.67915 | 0.39444 | 2.18761  | 0.0286981   |
| <i>F2r11</i>    | 2.65615  | TCONS_00043817 | NM_053897    | chr2:44378261-44391213   | rn_0d | rn_4d | OK | 0.45744 | 2.88346 | -3.03566 | 0.00240011  |
| <i>Hexb</i>     | 2.24177  | TCONS_00043830 | NM_001011946 | chr2:46895517-47171950   | rn_0d | rn_4d | OK | 42.9957 | 203.36  | -2.08111 | 0.0374237   |
| <i>Fam105a</i>  | 4.44741  | TCONS_00044006 | NM_001037648 | chr2:100047744-100070975 | rn_0d | rn_4d | OK | 3.33746 | 72.8147 | -3.98334 | 6.80E-05    |
| <i>Rarres1</i>  | 2.35726  | TCONS_00044238 | NM_001014790 | chr2:184000124-184036282 | rn_0d | rn_4d | OK | 9.03457 | 46.2928 | -2.89007 | 0.00385156  |
| <i>Sptssb</i>   | -3.06675 | TCONS_00044246 | NM_001271299 | chr2:186020417-186049284 | rn_0d | rn_4d | OK | 3.59639 | 0.42922 | 2.17616  | 0.0295436   |
| <i>Sptssb</i>   | -2.45703 | TCONS_00044247 | NM_001271301 | chr2:186020417-186049284 | rn_0d | rn_4d | OK | 5.5165  | 1.00467 | 2.2346   | 0.0254433   |
| <i>Cd1d1</i>    | 2.51119  | TCONS_00044320 | NM_017079    | chr2:205728724-205732232 | rn_0d | rn_4d | OK | 1.1362  | 6.47738 | -3.0691  | 0.00214702  |
| <i>Fcr1s</i>    | 8.31078  | TCONS_00044323 | NM_001107702 | chr2:205998854-206009505 | rn_0d | rn_4d | OK | 0.43664 | 138.65  | -10.448  | 0           |
| <i>Rab25</i>    | 3.40672  | TCONS_00044356 | NM_001107687 | chr2:207305700-207311798 | rn_0d | rn_4d | OK | 0.04032 | 0.42762 | -2.01383 | 0.0440276   |
| <i>Cks1b</i>    | 2.25328  | TCONS_00044394 | NM_001135749 | chr2:208154732-208159494 | rn_0d | rn_4d | OK | 2.26321 | 10.7902 | -2.54693 | 0.0108674   |
| <i>I16r</i>     | 2.7106   | TCONS_00044396 | NM_017020    | chr2:208629065-208677779 | rn_0d | rn_4d | OK | 2.14112 | 14.0156 | -3.87973 | 0.000104571 |
| <i>S100a9</i>   | 4.09958  | TCONS_00044416 | NM_053587    | chr2:209531411-209534093 | rn_0d | rn_4d | OK | 1.20391 | 20.639  | -4.29965 | 1.71E-05    |



|                 |           |                |                   |                          |       |       |    |          |          |           |              |
|-----------------|-----------|----------------|-------------------|--------------------------|-------|-------|----|----------|----------|-----------|--------------|
| <i>Fcgr1a</i>   | 3. 70989  | TCONS_00044475 | NM_001100836      | chr2:217916294-217925461 | rn_0d | rn_4d | OK | 2. 1601  | 28. 2658 | -4. 1612  | 3. 17E-05    |
| <i>Cd53</i>     | 4. 23581  | TCONS_00044551 | NM_012523         | chr2:228956378-229004197 | rn_0d | rn_4d | OK | 8. 08623 | 152. 353 | -6. 07869 | 1. 21E-09    |
| <i>Dapp1</i>    | 2. 3512   | TCONS_00044704 | NM_001108568      | chr2:261723410-261772455 | rn_0d | rn_4d | OK | 1. 49558 | 7. 63118 | -3. 06805 | 0. 0021546   |
| <i>Clca4l</i>   | 2. 61658  | TCONS_00044729 | NM_001077356      | chr2:269312354-269332154 | rn_0d | rn_4d | OK | 0. 13633 | 0. 83611 | -2. 5155  | 0. 0118864   |
| <i>Cyr61</i>    | 3. 38647  | TCONS_00044734 | NM_031327         | chr2:270055953-270058912 | rn_0d | rn_4d | OK | 2. 82616 | 29. 5546 | -4. 67426 | 2. 95E-06    |
| <i>Tcf19</i>    | 2. 74801  | TCONS_00048824 | NM_213561         | chr20:5831136-5833706    | rn_0d | rn_4d | OK | 2. 38677 | 16. 034  | -3. 32688 | 0. 000878256 |
| <i>RT1-DMa</i>  | 2. 67311  | TCONS_00048831 | NM_198741         | chr20:6015059-6018463    | rn_0d | rn_4d | OK | 7. 12448 | 45. 4402 | -3. 67105 | 0. 000241552 |
| <i>RT1-DMb</i>  | 3. 17234  | TCONS_00048832 | NM_198740         | chr20:6025148-6032386    | rn_0d | rn_4d | OK | 5. 32977 | 48. 0483 | -4. 45405 | 8. 43E-06    |
| <i>Psmb8</i>    | 2. 90451  | TCONS_00048834 | NM_080767         | chr20:6070356-6073320    | rn_0d | rn_4d | OK | 6. 16179 | 46. 1372 | -4. 00746 | 6. 14E-05    |
| <i>Clic1</i>    | 3. 30184  | TCONS_00048883 | NM_001002807      | chr20:7113248-7122093    | rn_0d | rn_4d | OK | 15. 3568 | 151. 445 | -4. 73048 | 2. 24E-06    |
| <i>RT1-A2</i>   | 2. 25349  | TCONS_00048901 | NM_001008829      | chr20:7395432-7500406    | rn_0d | rn_4d | OK | 34. 8125 | 165. 998 | -2. 30089 | 0. 0213978   |
| <i>Kifc1</i>    | 3. 21224  | TCONS_00048909 | NM_001005878      | chr20:7567670-7585191    | rn_0d | rn_4d | OK | 0. 78797 | 7. 30285 | -3. 75466 | 0. 000173579 |
| <i>Fgd2</i>     | 3. 66521  | TCONS_00048957 | NM_001107617      | chr20:9212057-9228716    | rn_0d | rn_4d | OK | 1. 21433 | 15. 4055 | -4. 24364 | 2. 20E-05    |
| <i>Mmp11</i>    | 2. 24466  | TCONS_00049058 | NM_012980         | chr20:15825613-15834397  | rn_0d | rn_4d | OK | 0. 52873 | 2. 5058  | -2. 54353 | 0. 010974    |
| <i>Cdk1</i>     | 4. 5582   | TCONS_00049098 | NM_019296         | chr20:22694920-22709859  | rn_0d | rn_4d | OK | 1. 19249 | 28. 094  | -5. 70064 | 1. 19E-08    |
| <i>Smpd13a</i>  | 3. 48504  | TCONS_00049194 | NM_001005539      | chr20:42510560-42532381  | rn_0d | rn_4d | OK | 27. 6203 | 309. 263 | -5. 68551 | 1. 30E-08    |
| <i>Mical1</i>   | 2. 40501  | TCONS_00049219 | NM_001106397      | chr20:47892300-47904250  | rn_0d | rn_4d | OK | 2. 26179 | 11. 9794 | -3. 05349 | 0. 00226195  |
| <i>Ier3</i>     | 2. 23355  | TCONS_00049337 | NM_212505         | chr20:5535615-5536820    | rn_0d | rn_4d | OK | 8. 62817 | 40. 5775 | -3. 04924 | 0. 00229421  |
| <i>Psmb9</i>    | 2. 61509  | TCONS_00049353 | NM_012708         | chr20:6052971-6058393    | rn_0d | rn_4d | OK | 4. 28793 | 26. 2705 | -3. 32747 | 0. 000876378 |
| <i>C2</i>       | 3. 38635  | TCONS_00049368 | NM_172222         | chr20:6622138-6641139    | rn_0d | rn_4d | OK | 10. 2199 | 106. 866 | -5. 38118 | 7. 40E-08    |
| <i>Aif1</i>     | 2. 99925  | TCONS_00049403 | NM_017196         | chr20:7234608-7236508    | rn_0d | rn_4d | OK | 29. 2503 | 233. 881 | -4. 60004 | 4. 22E-06    |
| <i>RT1-DMb</i>  | 3. 17711  | TCONS_00049406 | NM_198740_dup1    | chr20:7288113-7295351    | rn_0d | rn_4d | OK | 5. 33063 | 48. 2152 | -4. 46142 | 8. 14E-06    |
| <i>RT1-DMa</i>  | 2. 65629  | TCONS_00049407 | NM_198741_dup1    | chr20:7302035-7305439    | rn_0d | rn_4d | OK | 7. 12448 | 44. 9136 | -3. 64549 | 0. 000266883 |
| <i>Itgb2</i>    | 4. 99689  | TCONS_00049510 | NM_001037780      | chr20:13944168-13981060  | rn_0d | rn_4d | OK | 0. 8009  | 25. 5735 | -3. 44859 | 0. 000563525 |
| <i>Dse</i>      | 2. 44963  | TCONS_00049594 | NM_001108933      | chr20:29528499-29603741  | rn_0d | rn_4d | OK | 1. 47615 | 8. 06384 | -2. 61484 | 0. 00892688  |
| <i>Prdm1</i>    | 3. 02433  | TCONS_00049714 | NM_001107639      | chr20:51096615-51118247  | rn_0d | rn_4d | OK | 0. 13011 | 1. 0586  | -2. 94357 | 0. 00324446  |
| <i>Clic3</i>    | -3. 30995 | TCONS_00051191 | NM_001013080      | chr3:2657366-2659976     | rn_0d | rn_4d | OK | 4. 44976 | 0. 44869 | 2. 17534  | 0. 0296048   |
| <i>Fibcd1</i>   | -2. 65123 | TCONS_00051292 | NM_001107829      | chr3:14725660-14759373   | rn_0d | rn_4d | OK | 0. 82008 | 0. 13054 | 2. 81863  | 0. 00482293  |
| <i>Fibcd1</i>   | -2. 65123 | TCONS_00051302 | NM_001107829_dup1 | chr3:15357856-15391567   | rn_0d | rn_4d | OK | 0. 82008 | 0. 13054 | 2. 81863  | 0. 00482293  |
| <i>Arhgap15</i> | 2. 55536  | TCONS_00051404 | NM_001013917      | chr3:33831451-34442272   | rn_0d | rn_4d | OK | 1. 47801 | 8. 68794 | -3. 20596 | 0. 00134613  |
| <i>Tnfaip6</i>  | 3. 33951  | TCONS_00051420 | NM_053382         | chr3:42649265-42663190   | rn_0d | rn_4d | OK | 4. 29334 | 43. 4597 | -4. 53097 | 5. 87E-06    |
| <i>Cdca7</i>    | 2. 26265  | TCONS_00051550 | NM_001025693      | chr3:65630825-65641461   | rn_0d | rn_4d | OK | 0. 84312 | 4. 04588 | -2. 72824 | 0. 0063673   |
| <i>Spi1</i>     | 4. 01306  | TCONS_00051736 | NM_001005892      | chr3:86616013-86647050   | rn_0d | rn_4d | OK | 2. 37079 | 38. 2775 | -3. 90001 | 9. 62E-05    |
| <i>Kif18a</i>   | 2. 23591  | TCONS_00051818 | NM_001137642      | chr3:106967784-107028574 | rn_0d | rn_4d | OK | 0. 38861 | 1. 8306  | -2. 39404 | 0. 016664    |
| <i>Knstrn</i>   | 4. 25964  | TCONS_00051881 | NM_001004264      | chr3:117157779-117177434 | rn_0d | rn_4d | OK | 0. 48808 | 9. 34904 | -4. 57442 | 4. 78E-06    |
| <i>Ckmt1b</i>   | -2. 46353 | TCONS_00051929 | NM_001012738      | chr3:119858848-119864004 | rn_0d | rn_4d | OK | 164. 151 | 29. 7609 | 4. 08224  | 4. 46E-05    |
| <i>Slc28a2</i>  | 3. 50267  | TCONS_00051949 | NM_031664         | chr3:120896533-121186281 | rn_0d | rn_4d | OK | 1. 04955 | 11. 8963 | -2. 88006 | 0. 00397603  |
| <i>MGC10564</i> | 5. 17787  | TCONS_00051954 | NM_001008518      | chr3:121310710-121314264 | rn_0d | rn_4d | OK | 0. 38627 | 13. 9824 | -5. 00661 | 5. 54E-07    |
| <i>Dusp2</i>    | 3. 65262  | TCONS_00051996 | NM_001012089      | chr3:126303198-126305375 | rn_0d | rn_4d | OK | 0. 32329 | 4. 06575 | -3. 70336 | 0. 000212761 |
| <i>I11b</i>     | 2. 33327  | TCONS_00052019 | NM_031512         | chr3:128133928-128140351 | rn_0d | rn_4d | OK | 0. 34725 | 1. 74993 | -2. 37594 | 0. 0175045   |
| <i>I11a</i>     | 4. 38677  | TCONS_00052020 | NM_017019         | chr3:128180287-128190980 | rn_0d | rn_4d | OK | 0. 0535  | 1. 11909 | -2. 71115 | 0. 00670507  |
| <i>Lamp5</i>    | -2. 31915 | TCONS_00052085 | NM_001014183      | chr3:135507574-135519611 | rn_0d | rn_4d | OK | 91. 7816 | 18. 3917 | 3. 40022  | 0. 000673319 |
| <i>Syndig1</i>  | -3. 01397 | TCONS_00052163 | NM_001025020      | chr3:151405688-151571801 | rn_0d | rn_4d | OK | 10. 6795 | 1. 32208 | 2. 35056  | 0. 0187451   |
| <i>Gins1</i>    | 2. 14254  | TCONS_00052169 | NM_001109207      | chr3:153056223-153077645 | rn_0d | rn_4d | OK | 1. 64475 | 7. 26224 | -2. 50258 | 0. 0123291   |
| <i>Angpt4</i>   | 2. 48791  | TCONS_00052178 | NM_001106526      | chr3:153772189-153806972 | rn_0d | rn_4d | OK | 0. 35906 | 2. 01421 | -2. 33969 | 0. 0192999   |

|                 |          |                |                |                          |       |       |    |         |         |          |             |
|-----------------|----------|----------------|----------------|--------------------------|-------|-------|----|---------|---------|----------|-------------|
| <i>Tcf15</i>    | -4.11247 | TCONS_00052184 | NM_001168579   | chr3:153992076-153998337 | rn_0d | rn_4d | OK | 1.00108 | 0.05788 | 2.52211  | 0.0116653   |
| <i>Hck</i>      | 4.02364  | TCONS_00052220 | NM_013185      | chr3:154982908-155025530 | rn_0d | rn_4d | OK | 1.86591 | 30.3479 | -5.51208 | 3.55E-08    |
| <i>Acss2</i>    | -2.14463 | TCONS_00052260 | NM_001107793   | chr3:157400420-157443341 | rn_0d | rn_4d | OK | 87.2295 | 19.7272 | 3.62802  | 0.000285602 |
| <i>Tgm2</i>     | 2.04197  | TCONS_00052301 | NM_019386      | chr3:160977904-161007260 | rn_0d | rn_4d | OK | 13.5715 | 55.8884 | -3.35679 | 0.000788529 |
| <i>Vwa5a</i>    | 2.0847   | TCONS_00052323 | NM_198755      | chr3:165209767-165243203 | rn_0d | rn_4d | OK | 1.70141 | 7.21717 | -2.94288 | 0.00325175  |
| <i>Mybl2</i>    | 4.07422  | TCONS_00052337 | NM_001106536   | chr3:165617177-165645609 | rn_0d | rn_4d | OK | 0.14292 | 2.4074  | -4.08071 | 4.49E-05    |
| <i>Ube2c</i>    | 4.89838  | TCONS_00052376 | NM_001106542   | chr3:167422568-167424969 | rn_0d | rn_4d | OK | 0.61477 | 18.3347 | -5.07417 | 3.89E-07    |
| <i>Slc12a5</i>  | -2.79359 | TCONS_00052384 | NM_134363      | chr3:167610351-167650178 | rn_0d | rn_4d | OK | 31.4684 | 4.53857 | 2.69525  | 0.00703368  |
| <i>Cd40</i>     | 3.17507  | TCONS_00052385 | NM_134360      | chr3:167704271-167719544 | rn_0d | rn_4d | OK | 0.41887 | 3.78334 | -2.37578 | 0.0175121   |
| <i>Slc17a9</i>  | 3.03037  | TCONS_00052456 | NM_001108613   | chr3:179929393-179947616 | rn_0d | rn_4d | OK | 0.33162 | 2.70939 | -2.35284 | 0.0186307   |
| <i>Grin1</i>    | -2.86271 | TCONS_00052551 | NM_001270608   | chr3:2487838-2516076     | rn_0d | rn_4d | OK | 32.2619 | 4.43536 | 3.0079   | 0.00263062  |
| <i>Dpp7</i>     | 2.43051  | TCONS_00052554 | NM_031973      | chr3:2550547-2554800     | rn_0d | rn_4d | OK | 37.5507 | 202.43  | -4.09733 | 4.18E-05    |
| <i>Fcnb</i>     | 9.52634  | TCONS_00052638 | NM_053634      | chr3:11974690-11983068   | rn_0d | rn_4d | OK | 0.03462 | 25.5308 | -6.07158 | 1.27E-09    |
| <i>Dnm1</i>     | -2.10045 | TCONS_00052709 | NM_080689      | chr3:16686950-16736714   | rn_0d | rn_4d | OK | 96.8867 | 22.5926 | 2.28147  | 0.0225208   |
| <i>Lcn2</i>     | 4.14902  | TCONS_00052712 | NM_130741      | chr3:16763058-16766404   | rn_0d | rn_4d | OK | 2.16627 | 38.4319 | -5.25798 | 1.46E-07    |
| <i>Galnt3</i>   | 3.94498  | TCONS_00052895 | NM_001015032   | chr3:58806416-58843442   | rn_0d | rn_4d | OK | 0.0565  | 0.8701  | -2.34622 | 0.0189648   |
| <i>Scn1a</i>    | -4.07972 | TCONS_00052898 | NM_030875      | chr3:59016640-59158748   | rn_0d | rn_4d | OK | 13.7631 | 0.81395 | 2.51219  | 0.0119985   |
| <i>Spc25</i>    | 3.743    | TCONS_00052905 | NM_001009654   | chr3:62049988-62063416   | rn_0d | rn_4d | OK | 0.5612  | 7.51402 | -3.10679 | 0.00189131  |
| <i>Chn1</i>     | -2.30021 | TCONS_00052937 | NM_032083      | chr3:66992181-67121549   | rn_0d | rn_4d | OK | 26.6905 | 5.41907 | 2.16228  | 0.0305968   |
| <i>Serping1</i> | 2.51832  | TCONS_00052995 | NM_199093      | chr3:78681816-78691634   | rn_0d | rn_4d | OK | 7.19195 | 41.2037 | -2.99842 | 0.00271385  |
| <i>Thbd</i>     | 2.01552  | TCONS_00053510 | NM_031771      | chr3:149159894-149163547 | rn_0d | rn_4d | OK | 4.77053 | 19.2885 | -2.99941 | 0.00270505  |
| <i>Necab3</i>   | -2.76912 | TCONS_00053582 | NM_001098724   | chr3:156420460-156435016 | rn_0d | rn_4d | OK | 14.4688 | 2.12249 | 2.71791  | 0.00656957  |
| <i>Slc32a1</i>  | -2.34435 | TCONS_00053644 | NM_031782      | chr3:160500061-160504727 | rn_0d | rn_4d | OK | 52.2952 | 10.2977 | 3.60603  | 0.000310911 |
| <i>Lbp</i>      | 5.62346  | TCONS_00053652 | NM_017208      | chr3:160792718-160819979 | rn_0d | rn_4d | OK | 1.44043 | 71.0109 | -6.92269 | 4.43E-12    |
| <i>Ada</i>      | 2.31745  | TCONS_00053682 | NM_130399      | chr3:166305963-166330108 | rn_0d | rn_4d | OK | 1.52598 | 7.60623 | -2.44232 | 0.0145933   |
| <i>Slpi</i>     | 6.79755  | TCONS_00053696 | NM_053372      | chr3:166921183-166983345 | rn_0d | rn_4d | OK | 0.39119 | 43.5169 | -5.82142 | 5.83E-09    |
| <i>Bmp7</i>     | 2.61019  | TCONS_00053769 | NM_001191856   | chr3:176945361-177020745 | rn_0d | rn_4d | OK | 1.11595 | 6.81384 | -2.61405 | 0.0089475   |
| <i>Ctsz</i>     | 3.80571  | TCONS_00053778 | NM_183330      | chr3:178565102-178585389 | rn_0d | rn_4d | OK | 18.54   | 259.264 | -5.04364 | 4.57E-07    |
| <i>Kcnh2</i>    | -2.15704 | TCONS_00057881 | NM_053949      | chr4:7366963-7398604     | rn_0d | rn_4d | OK | 19.808  | 4.44125 | 2.75334  | 0.00589908  |
| <i>Steap1</i>   | 3.43007  | TCONS_00057938 | NM_001106629   | chr4:25343974-25354493   | rn_0d | rn_4d | OK | 0.28581 | 3.08061 | -2.77483 | 0.00552312  |
| <i>Mdfic</i>    | 2.18937  | TCONS_00058005 | NM_001105668   | chr4:41790494-41870160   | rn_0d | rn_4d | OK | 2.60379 | 11.876  | -2.76195 | 0.00574581  |
| <i>Tes</i>      | 2.84217  | TCONS_00058010 | NM_001039344   | chr4:44929701-44968306   | rn_0d | rn_4d | OK | 3.16111 | 22.6682 | -3.59419 | 0.000325399 |
| <i>Flnc</i>     | 2.76261  | TCONS_00058054 | NM_001191862   | chr4:56478246-56505940   | rn_0d | rn_4d | OK | 3.21241 | 21.8001 | -3.73532 | 0.00018748  |
| <i>Irf5</i>     | 2.90451  | TCONS_00058057 | NM_001106586   | chr4:56571632-56584857   | rn_0d | rn_4d | OK | 1.23697 | 9.26204 | -2.04322 | 0.0410308   |
| <i>Tmem176a</i> | 3.01083  | TCONS_00058246 | NM_001039008   | chr4:143138366-143150058 | rn_0d | rn_4d | OK | 31.1203 | 250.838 | -2.27092 | 0.0231521   |
| <i>GpnmB</i>    | 6.84928  | TCONS_00058251 | NM_133298      | chr4:143383025-143404104 | rn_0d | rn_4d | OK | 8.42541 | 971.472 | -9.29376 | 0           |
| <i>Cd8b</i>     | 9.51444  | TCONS_00058369 | NM_031539      | chr4:163945164-163980402 | rn_0d | rn_4d | OK | 0.03126 | 22.8621 | -3.4696  | 0.000521236 |
| <i>Cd8a</i>     | 10.0516  | TCONS_00058370 | NM_031538      | chr4:164017632-164021870 | rn_0d | rn_4d | OK | 0.08246 | 87.5074 | -7.31259 | 2.62E-13    |
| <i>Capg</i>     | 3.86707  | TCONS_00058391 | NM_001013086   | chr4:165172598-165189840 | rn_0d | rn_4d | OK | 2.44214 | 35.6349 | -2.77271 | 0.00555917  |
| <i>Mob1a</i>    | 2.02813  | TCONS_00058434 | NM_001033891   | chr4:179612701-179631469 | rn_0d | rn_4d | OK | 9.21322 | 37.5784 | -3.32738 | 0.000876658 |
| <i>Trh</i>      | 2.5709   | TCONS_00058535 | NM_013046      | chr4:189148769-189151296 | rn_0d | rn_4d | OK | 3.52711 | 20.9574 | -3.36468 | 0.000766334 |
| <i>Clec12a</i>  | 4.95768  | TCONS_00058623 | NM_001134716   | chr4:211756067-211774947 | rn_0d | rn_4d | OK | 1.63101 | 50.6836 | -4.35033 | 1.36E-05    |
| <i>Slc25a18</i> | -2.2301  | TCONS_00058682 | NM_001044280   | chr4:220420190-220440659 | rn_0d | rn_4d | OK | 31.1878 | 6.64751 | 3.02956  | 0.00244908  |
| <i>Tuba8</i>    | -2.34374 | TCONS_00058688 | NM_001024339   | chr4:220863727-220880882 | rn_0d | rn_4d | OK | 7.89928 | 1.55615 | 2.38884  | 0.0169016   |
| <i>A2m</i>      | 2.57388  | TCONS_00058697 | NM_012488_dup1 | chr4:221393232-221442945 | rn_0d | rn_4d | OK | 11.493  | 68.4302 | -4.33028 | 1.49E-05    |

|                 |           |                |                   |                          |       |       |    |          |          |           |              |
|-----------------|-----------|----------------|-------------------|--------------------------|-------|-------|----|----------|----------|-----------|--------------|
| <i>A2m</i>      | 2. 57722  | TCONS_00058698 | NM_012488         | chr4:221506286-221556157 | rn_0d | rn_4d | OK | 11. 5038 | 68. 6534 | -4. 33582 | 1. 45E-05    |
| <i>Tnfrsf1a</i> | 2. 21431  | TCONS_00058764 | NM_013091         | chr4:224881444-224894088 | rn_0d | rn_4d | OK | 9. 98853 | 46. 3527 | -3. 39039 | 0. 000697923 |
| <i>Prmt8</i>    | -2. 06788 | TCONS_00058807 | NM_001271385      | chr4:231280151-231361024 | rn_0d | rn_4d | OK | 4. 31927 | 1. 03019 | 2. 01475  | 0. 0439307   |
| <i>Gprc5a</i>   | 4. 79824  | TCONS_00058826 | NM_001079890      | chr4:233105138-233123586 | rn_0d | rn_4d | OK | 0. 1549  | 4. 30996 | -4. 65396 | 3. 26E-06    |
| <i>Hlxb9</i>    | -3. 84096 | TCONS_00058916 | NM_001271274      | chr4:2429079-2434037     | rn_0d | rn_4d | OK | 0. 77031 | 0. 05376 | 2. 84062  | 0. 00450262  |
| <i>Lrrc17</i>   | 2. 38533  | TCONS_00058963 | NM_001025155      | chr4:10021507-10170201   | rn_0d | rn_4d | OK | 0. 5001  | 2. 61285 | -2. 51269 | 0. 0119814   |
| <i>Abcb1b</i>   | 2. 09458  | TCONS_00059001 | NM_012623         | chr4:22161934-22244635   | rn_0d | rn_4d | OK | 0. 29433 | 1. 25708 | -2. 00303 | 0. 0451737   |
| <i>Pon3</i>     | 3. 53686  | TCONS_00059038 | NM_001004086      | chr4:30218887-30245611   | rn_0d | rn_4d | OK | 0. 70699 | 8. 20565 | -2. 56989 | 0. 0101731   |
| <i>Inmt</i>     | 3. 60746  | TCONS_00059281 | NM_001109022      | chr4:150039150-150043447 | rn_0d | rn_4d | OK | 0. 7679  | 9. 35956 | -4. 00999 | 6. 07E-05    |
| <i>Neurod6</i>  | -3. 15796 | TCONS_00059282 | NM_001109237      | chr4:150564265-150567512 | rn_0d | rn_4d | OK | 2. 46368 | 0. 27602 | 3. 30014  | 0. 00096637  |
| <i>Hpgds</i>    | 3. 26161  | TCONS_00059305 | NM_031644         | chr4:160734258-160758902 | rn_0d | rn_4d | OK | 0. 36345 | 3. 48566 | -3. 33518 | 0. 000852437 |
| <i>Rpia</i>     | 2. 22136  | TCONS_00059313 | NM_001108632      | chr4:163347715-163373352 | rn_0d | rn_4d | OK | 2. 58271 | 12. 044  | -2. 10926 | 0. 0349219   |
| <i>Dok1</i>     | 2. 51538  | TCONS_00059354 | NM_001025416      | chr4:178549314-178551776 | rn_0d | rn_4d | OK | 1. 17814 | 6. 73599 | -2. 94287 | 0. 00325187  |
| <i>Clec7a</i>   | 7. 5123   | TCONS_00059556 | NM_001173386      | chr4:211834025-211870955 | rn_0d | rn_4d | OK | 0. 3468  | 63. 3158 | -5. 38149 | 7. 39E-08    |
| <i>Olr1</i>     | 4. 1651   | TCONS_00059557 | NM_133306         | chr4:211883402-211905489 | rn_0d | rn_4d | OK | 0. 60086 | 10. 7795 | -5. 43763 | 5. 40E-08    |
| <i>Klra17</i>   | 5. 81104  | TCONS_00059565 | NM_001172088      | chr4:212391145-212501991 | rn_0d | rn_4d | OK | 0. 11044 | 6. 20029 | -3. 62443 | 0. 000289597 |
| <i>Ly49si3</i>  | 7. 76583  | TCONS_00059568 | NM_001009498      | chr4:212531164-213575577 | rn_0d | rn_4d | OK | 0. 08669 | 18. 868  | -3. 44231 | 0. 000576765 |
| <i>Ly49si3</i>  | 7. 562    | TCONS_00059569 | NM_001009498_dup1 | chr4:212531164-213575577 | rn_0d | rn_4d | OK | 0. 08669 | 16. 3821 | -3. 3103  | 0. 000931955 |
| <i>Klra5</i>    | 6. 99399  | TCONS_00059579 | NM_198746         | chr4:213842330-213991009 | rn_0d | rn_4d | OK | 0. 0519  | 6. 61615 | -3. 58276 | 0. 000339986 |
| <i>Clec4a2</i>  | 5. 67763  | TCONS_00059654 | NM_001005880      | chr4:222810680-222886233 | rn_0d | rn_4d | OK | 0. 10086 | 5. 16241 | -2. 57738 | 0. 00995516  |
| <i>Tspan11</i>  | 2. 62901  | TCONS_00059757 | NM_001024262      | chr4:231093028-231159358 | rn_0d | rn_4d | OK | 0. 66385 | 4. 10659 | -2. 06623 | 0. 0388064   |
| <i>P1bd1</i>    | 6. 64215  | TCONS_00059783 | NM_001013927      | chr4:234823107-234880050 | rn_0d | rn_4d | OK | 0. 45513 | 45. 4589 | -7. 84295 | 4. 44E-15    |
| <i>Lyn</i>      | 2. 66423  | TCONS_00063166 | NM_001111098      | chr5:21307093-21423261   | rn_0d | rn_4d | OK | 2. 15713 | 13. 6738 | -2. 2841  | 0. 0223654   |
| <i>Lyn</i>      | 3. 46894  | TCONS_00063167 | NM_030857         | chr5:21307093-21423261   | rn_0d | rn_4d | OK | 1. 4868  | 16. 4629 | -2. 70192 | 0. 00689406  |
| <i>Mms22l</i>   | 4. 47728  | TCONS_00063242 | NM_001135780      | chr5:43473573-43590298   | rn_0d | rn_4d | OK | 0. 08613 | 1. 91845 | -2. 53624 | 0. 011205    |
| <i>Cnr1</i>     | -2. 31111 | TCONS_00063270 | NM_012784         | chr5:53880021-53904203   | rn_0d | rn_4d | OK | 8. 85347 | 1. 78402 | 2. 44547  | 0. 0144663   |
| <i>Col15a1</i>  | 2. 11052  | TCONS_00063355 | NM_001100535      | chr5:67359918-67469799   | rn_0d | rn_4d | OK | 6. 13424 | 26. 4906 | -3. 05119 | 0. 00227933  |
| <i>Tgfbr1</i>   | 3. 39653  | TCONS_00063357 | NM_012775         | chr5:67570325-67639227   | rn_0d | rn_4d | OK | 10. 5976 | 111. 6   | -4. 80719 | 1. 53E-06    |
| <i>Tlr4</i>     | 2. 66164  | TCONS_00063445 | NM_019178         | chr5:86690619-86704810   | rn_0d | rn_4d | OK | 0. 87172 | 5. 51585 | -2. 72391 | 0. 00645139  |
| <i>Oma1</i>     | 2. 24641  | TCONS_00063539 | NM_001106669      | chr5:126714756-126767291 | rn_0d | rn_4d | OK | 2. 05278 | 9. 74047 | -2. 63325 | 0. 00845727  |
| <i>Rspol</i>    | 4. 09663  | TCONS_00063758 | NM_001107980      | chr5:146755087-146776423 | rn_0d | rn_4d | OK | 0. 40859 | 6. 99036 | -4. 61504 | 3. 93E-06    |
| <i>Zmy6nb</i>   | 5. 3821   | TCONS_00063793 | NM_001271137      | chr5:148958332-148962001 | rn_0d | rn_4d | OK | 0. 28896 | 12. 0505 | -2. 84769 | 0. 00440374  |
| <i>Cnr2</i>     | 2. 76049  | TCONS_00063914 | NM_001164142      | chr5:158006693-158033101 | rn_0d | rn_4d | OK | 0. 79203 | 5. 36701 | -3. 28243 | 0. 00102917  |
| <i>Pla2g2d</i>  | 5. 00766  | TCONS_00063971 | NM_001013428      | chr5:160962030-160970154 | rn_0d | rn_4d | OK | 0. 37745 | 12. 1427 | -4. 42415 | 9. 68E-06    |
| <i>Slc2a5</i>   | 3. 17936  | TCONS_00064063 | NM_031741         | chr5:170782620-170808467 | rn_0d | rn_4d | OK | 2. 5855  | 23. 4222 | -3. 57381 | 0. 000351823 |
| <i>LOC29775</i> | 2. 50412  | TCONS_00064183 | NM_001013928      | chr5:2789993-2794284     | rn_0d | rn_4d | OK | 0. 47501 | 2. 69477 | -2. 34681 | 0. 0189351   |
| <i>Plekhf2</i>  | 2. 00224  | TCONS_00064251 | NM_001108655      | chr5:28967291-28982656   | rn_0d | rn_4d | OK | 6. 16085 | 24. 6817 | -2. 94637 | 0. 00321526  |
| <i>Atp6v0d2</i> | 5. 35501  | TCONS_00064283 | NM_001011972      | chr5:38498890-38547691   | rn_0d | rn_4d | OK | 0. 03238 | 1. 32524 | -3. 06241 | 0. 0021956   |
| <i>Akna</i>     | 2. 79391  | TCONS_00064529 | NM_001108668      | chr5:83298321-83344501   | rn_0d | rn_4d | OK | 0. 74107 | 5. 13936 | -2. 59431 | 0. 00947805  |
| <i>Plin2</i>    | 3. 32251  | TCONS_00064582 | NM_001007144      | chr5:108973077-108999219 | rn_0d | rn_4d | OK | 8. 11028 | 81. 1357 | -3. 39639 | 0. 000682816 |
| <i>Kif2c</i>    | 5. 44753  | TCONS_00064732 | NM_001085369      | chr5:139821000-139846591 | rn_0d | rn_4d | OK | 0. 09431 | 4. 11558 | -3. 89733 | 9. 73E-05    |
| <i>Cdc20</i>    | 3. 54378  | TCONS_00064759 | NM_171993         | chr5:141050191-141054395 | rn_0d | rn_4d | OK | 1. 09609 | 12. 783  | -4. 45992 | 8. 20E-06    |
| <i>Cdca8</i>    | 2. 82392  | TCONS_00064833 | NM_001025050      | chr5:146680980-146700067 | rn_0d | rn_4d | OK | 1. 43073 | 10. 1308 | -3. 41974 | 0. 000626815 |
| <i>Clqb</i>     | 3. 42804  | TCONS_00065008 | NM_019262         | chr5:159008942-159014492 | rn_0d | rn_4d | OK | 34. 4015 | 370. 272 | -5. 53313 | 3. 15E-08    |
| <i>Clqc</i>     | 3. 70019  | TCONS_00065009 | NM_001008524      | chr5:159017523-159020910 | rn_0d | rn_4d | OK | 19. 6085 | 254. 866 | -4. 6901  | 2. 73E-06    |

|                 |           |                |                   |                          |       |       |    |         |         |          |             |
|-----------------|-----------|----------------|-------------------|--------------------------|-------|-------|----|---------|---------|----------|-------------|
| <i>C1qa</i>     | 2. 90434  | TCONS_00065011 | NM_001008515      | chr5:159023752-159026600 | rn_0d | rn_4d | OK | 51.3417 | 384.383 | -4.81626 | 1.46E-06    |
| <i>Ttc7a</i>    | 3. 33429  | TCONS_00068852 | NM_001100756      | chr6:20900465-21002088   | rn_0d | rn_4d | OK | 1.13089 | 11.4062 | -3.23124 | 0.00123253  |
| <i>LOC29879</i> | 3. 25886  | TCONS_00068891 | NM_001013941      | chr6:33617272-33618546   | rn_0d | rn_4d | OK | 0.0622  | 0.59535 | -2.33635 | 0.0194729   |
| <i>Sdc1</i>     | 4. 05597  | TCONS_00068967 | NM_013026         | chr6:43667443-43689903   | rn_0d | rn_4d | OK | 0.56    | 9.31447 | -3.87163 | 0.000108111 |
| <i>Pxdn</i>     | 2. 27339  | TCONS_00069005 | NM_001271261      | chr6:57551549-57663604   | rn_0d | rn_4d | OK | 1.22684 | 5.93126 | -2.02931 | 0.0424267   |
| <i>Rrm2</i>     | 3. 70943  | TCONS_00069037 | NM_001025740      | chr6:60715754-60762351   | rn_0d | rn_4d | OK | 2.68193 | 35.0831 | -3.55679 | 0.000375418 |
| <i>Batf</i>     | 3. 60176  | TCONS_00069309 | NM_001106748      | chr6:118868533-118890817 | rn_0d | rn_4d | OK | 0.4034  | 4.89747 | -3.64866 | 0.000263611 |
| <i>Dio3</i>     | 4. 16312  | TCONS_00069501 | NM_017210         | chr6:143766522-143768383 | rn_0d | rn_4d | OK | 0.05008 | 0.89723 | -3.05261 | 0.00226864  |
| <i>Aspg</i>     | 2. 96533  | TCONS_00069528 | NM_144750         | chr6:145692021-145711786 | rn_0d | rn_4d | OK | 0.73788 | 5.76283 | -2.40426 | 0.0162051   |
| <i>Zfp3612</i>  | 2. 06359  | TCONS_00069652 | NM_001036626      | chr6:7357980-7362018     | rn_0d | rn_4d | OK | 5.02964 | 21.0252 | -3.00241 | 0.0026785   |
| <i>Epcam</i>    | 3. 14327  | TCONS_00069668 | NM_138541         | chr6:21264115-21280099   | rn_0d | rn_4d | OK | 0.28595 | 2.5264  | -3.04863 | 0.00229887  |
| <i>Vsn11</i>    | -2. 16134 | TCONS_00069785 | NM_012686         | chr6:46751472-46872211   | rn_0d | rn_4d | OK | 219.684 | 49.1101 | 3.6917   | 0.000222757 |
| <i>Pyg1</i>     | 4. 34853  | TCONS_00069950 | NM_022268         | chr6:102044910-102091119 | rn_0d | rn_4d | OK | 0.71974 | 14.6626 | -4.55742 | 5.18E-06    |
| <i>Tmem229b</i> | -2. 58233 | TCONS_00069996 | NM_001109359      | chr6:111524765-111565742 | rn_0d | rn_4d | OK | 16.8756 | 2.81773 | 1.96274  | 0.0496759   |
| <i>Efcab11</i>  | 2. 36518  | TCONS_00070126 | NM_001024350      | chr6:132968485-133119919 | rn_0d | rn_4d | OK | 0.17494 | 0.90131 | -2.12819 | 0.0333212   |
| <i>Lgmn</i>     | 2. 29064  | TCONS_00070142 | NM_022226         | chr6:135492942-135531839 | rn_0d | rn_4d | OK | 45.8038 | 224.105 | -2.75814 | 0.00581311  |
| <i>Pros1</i>    | 2. 65168  | TCONS_00072774 | NM_031086         | chr7:1199863-1279996     | rn_0d | rn_4d | OK | 3.62421 | 22.7745 | -3.10664 | 0.00189228  |
| <i>Mmp19</i>    | 4. 38378  | TCONS_00072814 | NM_001107159      | chr7:3187823-3195771     | rn_0d | rn_4d | OK | 0.97095 | 20.2695 | -4.04373 | 5.26E-05    |
| <i>Cd63</i>     | 2. 52294  | TCONS_00072818 | NM_017125         | chr7:3303448-3305798     | rn_0d | rn_4d | OK | 132.001 | 758.676 | -4.27784 | 1.89E-05    |
| <i>Sbno2</i>    | 2. 59838  | TCONS_00072934 | NM_001108068      | chr7:12641918-12685802   | rn_0d | rn_4d | OK | 2.45499 | 14.8676 | -3.14864 | 0.00164034  |
| <i>Myo1f</i>    | 4. 88496  | TCONS_00073012 | NM_001108076      | chr7:18618344-18669048   | rn_0d | rn_4d | OK | 1.48155 | 43.7758 | -6.98248 | 2.90E-12    |
| <i>Aldh112</i>  | 3. 54071  | TCONS_00073051 | NM_001191778      | chr7:26506320-26555273   | rn_0d | rn_4d | OK | 0.17312 | 2.01463 | -2.89368 | 0.00380756  |
| <i>Epyc</i>     | -3. 27181 | TCONS_00073114 | NM_001108088      | chr7:38938394-38975915   | rn_0d | rn_4d | OK | 0.77715 | 0.08046 | 2.64087  | 0.00826942  |
| <i>Dusp6</i>    | 2. 22585  | TCONS_00073129 | NM_053883         | chr7:41506393-41510627   | rn_0d | rn_4d | OK | 5.5757  | 26.0824 | -3.2045  | 0.00135295  |
| <i>Lyc2</i>     | 5. 51065  | TCONS_00073184 | NM_001128494      | chr7:60318026-60325592   | rn_0d | rn_4d | OK | 0.53627 | 24.4486 | -6.61932 | 3.61E-11    |
| <i>Gns</i>      | 2. 14165  | TCONS_00073201 | NM_001011989      | chr7:63691011-63720825   | rn_0d | rn_4d | OK | 12.905  | 56.9455 | -3.36116 | 0.000776165 |
| <i>Gns</i>      | 2. 14165  | TCONS_00073212 | NM_001011989_dup1 | chr7:65824338-65856861   | rn_0d | rn_4d | OK | 12.905  | 56.9455 | -3.36116 | 0.000776165 |
| <i>B4galnt1</i> | -2. 33227 | TCONS_00073233 | NM_022860         | chr7:70630281-70645094   | rn_0d | rn_4d | OK | 11.2279 | 2.22955 | 2.13832  | 0.0324911   |
| <i>Arhgap9</i>  | 3. 74057  | TCONS_00073239 | NM_001012198      | chr7:70787048-70807343   | rn_0d | rn_4d | OK | 0.86995 | 11.6283 | -2.20092 | 0.0277415   |
| <i>Trhr</i>     | -3. 19864 | TCONS_00073284 | NM_013047         | chr7:83121164-83161215   | rn_0d | rn_4d | OK | 2.98719 | 0.32537 | 2.58605  | 0.00970834  |
| <i>Atad2</i>    | 3. 74964  | TCONS_00073313 | NM_001134879      | chr7:98589667-98631755   | rn_0d | rn_4d | OK | 0.5232  | 7.03756 | -3.24677 | 0.00116724  |
| <i>Myc</i>      | 3. 1233   | TCONS_00073330 | NM_012603         | chr7:103157451-103162378 | rn_0d | rn_4d | OK | 0.82249 | 7.16697 | -3.13683 | 0.00170786  |
| <i>Pzca</i>     | 5. 66315  | TCONS_00073361 | NM_001172106      | chr7:115995491-115997258 | rn_0d | rn_4d | OK | 0.55371 | 28.0582 | -4.97251 | 6.61E-07    |
| <i>Ncf4</i>     | 4. 22826  | TCONS_00073424 | NM_001127304      | chr7:119473858-119490871 | rn_0d | rn_4d | OK | 0.82584 | 15.4785 | -5.24731 | 1.54E-07    |
| <i>Maff</i>     | 2. 6468   | TCONS_00073461 | NM_001130573      | chr7:120572278-120585142 | rn_0d | rn_4d | OK | 1.07823 | 6.75267 | -2.67899 | 0.00738447  |
| <i>Bik</i>      | 3. 40805  | TCONS_00073522 | NM_053704         | chr7:124380346-124399141 | rn_0d | rn_4d | OK | 0.05348 | 0.56768 | -2.01462 | 0.0439448   |
| <i>Tspo</i>     | 3. 36722  | TCONS_00073523 | NM_012515         | chr7:124449360-124459090 | rn_0d | rn_4d | OK | 9.55672 | 98.6152 | -4.6863  | 2.78E-06    |
| <i>Zfp3612</i>  | 2. 03546  | TCONS_00073724 | NM_001036626      | chr7:2327990-2332024     | rn_0d | rn_4d | OK | 5.34334 | 21.9053 | -2.98095 | 0.00287355  |
| <i>Dram</i>     | 2. 33328  | TCONS_00074050 | NM_001173427      | chr7:29007042-29040487   | rn_0d | rn_4d | OK | 1.39204 | 7.01515 | -2.9832  | 0.00285254  |
| <i>Tmpo</i>     | 2. 37826  | TCONS_00074079 | NM_012887         | chr7:31934358-31959415   | rn_0d | rn_4d | OK | 3.97796 | 20.6818 | -2.23292 | 0.0255545   |
| <i>Lyz2</i>     | 4. 4236   | TCONS_00074162 | NM_012771         | chr7:60337949-60343246   | rn_0d | rn_4d | OK | 57.2225 | 1228.02 | -6.89723 | 5.30E-12    |
| <i>Nxph4</i>    | -2. 07739 | TCONS_00074230 | NM_021680         | chr7:71006676-71014869   | rn_0d | rn_4d | OK | 10.4439 | 2.4746  | 2.36884  | 0.0178441   |
| <i>Pabpc1</i>   | 2. 04604  | TCONS_00074259 | NM_134353         | chr7:75557273-75570196   | rn_0d | rn_4d | OK | 41.6593 | 172.041 | -2.69169 | 0.00710909  |
| <i>Cthrc1</i>   | 4. 54359  | TCONS_00074283 | NM_172333         | chr7:78271769-78282052   | rn_0d | rn_4d | OK | 1.01108 | 23.5799 | -5.3388  | 9.36E-08    |
| <i>Has2</i>     | 2. 00955  | TCONS_00074334 | NM_013153         | chr7:97055457-97081461   | rn_0d | rn_4d | OK | 0.57107 | 2.29944 | -2.42611 | 0.0152618   |

|                 |          |                |              |                          |       |       |    |         |         |          |             |
|-----------------|----------|----------------|--------------|--------------------------|-------|-------|----|---------|---------|----------|-------------|
| <i>Lynx1</i>    | -2.22275 | TCONS_00074404 | NM_001130546 | chr7:115888267-115893471 | rn_0d | rn_4d | OK | 79.429  | 17.0162 | 3.79104  | 0.000150019 |
| <i>Oplah</i>    | 3.19604  | TCONS_00074456 | NM_053904    | chr7:117339711-117355490 | rn_0d | rn_4d | OK | 2.52795 | 23.1672 | -2.85428 | 0.0043135   |
| <i>Slc39a4</i>  | 3.34143  | TCONS_00074468 | NM_001077669 | chr7:117663812-117668013 | rn_0d | rn_4d | OK | 0.16041 | 1.62591 | -2.19972 | 0.0278265   |
| <i>Pvalb</i>    | -2.38214 | TCONS_00074504 | NM_022499    | chr7:119420314-119433347 | rn_0d | rn_4d | OK | 76.1045 | 14.5988 | 2.5135   | 0.011954    |
| <i>C1qtnf6</i>  | 2.46794  | TCONS_00074513 | NM_001034932 | chr7:119734787-119741354 | rn_0d | rn_4d | OK | 1.13102 | 6.2574  | -2.50496 | 0.0122466   |
| <i>Rac2</i>     | 4.07901  | TCONS_00074515 | NM_001008384 | chr7:119772956-119786350 | rn_0d | rn_4d | OK | 3.15244 | 53.2785 | -4.90818 | 9.19E-07    |
| <i>Cyp2d1</i>   | 2.59879  | TCONS_00074594 | NM_153313    | chr7:123601167-123623719 | rn_0d | rn_4d | OK | 1.61399 | 9.77721 | -2.57199 | 0.0101117   |
| <i>Sul14a1</i>  | -2.07296 | TCONS_00074621 | NM_031641    | chr7:124946960-124970976 | rn_0d | rn_4d | OK | 134.016 | 31.8517 | 3.53506  | 0.000407676 |
| <i>Plxnb2</i>   | 2.27152  | TCONS_00074659 | NM_001108106 | chr7:129821098-129848156 | rn_0d | rn_4d | OK | 4.93896 | 23.8469 | -2.47837 | 0.0131986   |
| <i>Bin2</i>     | 3.06959  | TCONS_00074762 | NM_001012223 | chr7:140078977-140105557 | rn_0d | rn_4d | OK | 3.84448 | 32.2758 | -3.56707 | 0.000360994 |
| <i>Nfe2</i>     | 4.65809  | TCONS_00074812 | NM_001012224 | chr7:142654115-142661467 | rn_0d | rn_4d | OK | 0.02553 | 0.64464 | -2.83703 | 0.00455349  |
| <i>Gpr84</i>    | 2.68541  | TCONS_00074814 | NM_001109509 | chr7:142714631-142716944 | rn_0d | rn_4d | OK | 1.63982 | 10.5483 | -2.68423 | 0.00726969  |
| <i>Mmp3</i>     | 4.76138  | TCONS_00078030 | NM_133523    | chr8:5680373-5701427     | rn_0d | rn_4d | OK | 0.1082  | 2.93453 | -4.04219 | 5.30E-05    |
| <i>Icam1</i>    | 3.06734  | TCONS_00078109 | NM_012967    | chr8:22091920-22105661   | rn_0d | rn_4d | OK | 1.17169 | 9.82138 | -2.98486 | 0.00283708  |
| <i>LOC69114</i> | 5.74945  | TCONS_00078129 | NM_001109624 | chr8:22613206-22630263   | rn_0d | rn_4d | OK | 0.37993 | 20.4392 | -6.32386 | 2.55E-10    |
| <i>Vwa5a</i>    | 2.0847   | TCONS_00078271 | NM_198755    | chr8:42430363-42463799   | rn_0d | rn_4d | OK | 1.70141 | 7.21717 | -2.94288 | 0.00325175  |
| <i>Scn4b</i>    | -2.43063 | TCONS_00078337 | NM_001008880 | chr8:48067554-48082728   | rn_0d | rn_4d | OK | 79.4907 | 14.7442 | 4.11901  | 3.81E-05    |
| <i>LOC36306</i> | 2.9114   | TCONS_00078378 | NM_001014209 | chr8:53522675-53534330   | rn_0d | rn_4d | OK | 0.11706 | 0.88072 | -2.44442 | 0.0145086   |
| <i>Isl2</i>     | -3.63331 | TCONS_00078441 | NM_020471    | chr8:58696063-58700544   | rn_0d | rn_4d | OK | 0.53038 | 0.04274 | 2.20183  | 0.027677    |
| <i>Pstpip1</i>  | 4.00008  | TCONS_00078444 | NM_001106824 | chr8:59330663-59370472   | rn_0d | rn_4d | OK | 0.68408 | 10.9459 | -2.77356 | 0.00554464  |
| <i>Scamp2</i>   | 2.30198  | TCONS_00078476 | NM_023955    | chr8:62119184-62145787   | rn_0d | rn_4d | OK | 12.5178 | 61.7293 | -3.58384 | 0.000338579 |
| <i>Hexa</i>     | 2.58319  | TCONS_00078499 | NM_001004443 | chr8:64087246-64112576   | rn_0d | rn_4d | OK | 27.5216 | 164.927 | -4.29631 | 1.74E-05    |
| <i>Anxa2</i>    | 2.29936  | TCONS_00078619 | NM_019905    | chr8:80014389-80050845   | rn_0d | rn_4d | OK | 53.0304 | 261.038 | -3.91415 | 9.07E-05    |
| <i>Mthfs</i>    | 2.16198  | TCONS_00078691 | NM_001009349 | chr8:96071790-96121397   | rn_0d | rn_4d | OK | 2.73307 | 12.2313 | -2.32409 | 0.0201206   |
| <i>Plod2</i>    | 2.69255  | TCONS_00078711 | NM_001142915 | chr8:99462924-99545577   | rn_0d | rn_4d | OK | 1.11564 | 7.21211 | -2.32279 | 0.0201903   |
| <i>Rbp1</i>     | 2.87729  | TCONS_00078737 | NM_012733    | chr8:105891029-105912684 | rn_0d | rn_4d | OK | 18.4149 | 135.307 | -4.01665 | 5.90E-05    |
| <i>Tlr9</i>     | 2.16559  | TCONS_00078780 | NM_198131    | chr8:114279022-114283069 | rn_0d | rn_4d | OK | 0.2213  | 0.99285 | -2.29372 | 0.0218064   |
| <i>Gpx1</i>     | 2.42417  | TCONS_00078837 | NM_030826    | chr8:116466117-116467216 | rn_0d | rn_4d | OK | 73.2706 | 393.257 | -4.05633 | 4.98E-05    |
| <i>Glb1</i>     | 2.12755  | TCONS_00078945 | NM_001108192 | chr8:121752181-121824793 | rn_0d | rn_4d | OK | 3.85961 | 16.8655 | -2.10997 | 0.0348606   |
| <i>Entpd3</i>   | -3.30435 | TCONS_00078996 | NM_178106    | chr8:128399673-128430988 | rn_0d | rn_4d | OK | 7.27282 | 0.7362  | 3.09524  | 0.00196651  |
| <i>Piwi14</i>   | 3.99712  | TCONS_00079104 | NM_001271133 | chr8:13150609-13192599   | rn_0d | rn_4d | OK | 0.04655 | 0.74337 | -2.27324 | 0.0230118   |
| <i>Acp5</i>     | 7.14425  | TCONS_00079219 | NM_019144    | chr8:23197094-23202598   | rn_0d | rn_4d | OK | 0.30497 | 43.1416 | -5.22609 | 1.73E-07    |
| <i>Acp5</i>     | 4.37074  | TCONS_00079220 | NM_001270889 | chr8:23197094-23202598   | rn_0d | rn_4d | OK | 0.38172 | 7.89707 | -2.49718 | 0.0125187   |
| <i>St14</i>     | 5.01942  | TCONS_00079256 | NM_053635    | chr8:32266157-32305925   | rn_0d | rn_4d | OK | 0.28062 | 9.10147 | -3.77924 | 0.000157305 |
| <i>Tmem25</i>   | -2.45371 | TCONS_00079385 | NM_001109528 | chr8:47719266-47724850   | rn_0d | rn_4d | OK | 8.41497 | 1.53608 | 2.05668  | 0.0397175   |
| <i>I110ra</i>   | 3.43432  | TCONS_00079400 | NM_057193    | chr8:48186337-48200357   | rn_0d | rn_4d | OK | 0.96376 | 10.4184 | -3.052   | 0.00227325  |
| <i>Htr3a</i>    | -2.18347 | TCONS_00079428 | NM_024394    | chr8:51803896-51816207   | rn_0d | rn_4d | OK | 2.43588 | 0.53625 | 2.20143  | 0.0277054   |
| <i>LOC68653</i> | 2.13964  | TCONS_00079541 | NM_001126300 | chr8:62722821-62725067   | rn_0d | rn_4d | OK | 16.4731 | 72.5889 | -3.44162 | 0.000578246 |
| <i>Lox11</i>    | 2.642    | TCONS_00079543 | NM_001012125 | chr8:62843788-62868157   | rn_0d | rn_4d | OK | 3.09072 | 19.2922 | -3.43247 | 0.000598104 |
| <i>Cd276</i>    | 2.51866  | TCONS_00079545 | NM_182824    | chr8:63090337-63120814   | rn_0d | rn_4d | OK | 3.95005 | 22.6358 | -3.06174 | 0.00220054  |
| <i>Rab27a</i>   | 2.1855   | TCONS_00079624 | NM_017317    | chr8:73311540-73367258   | rn_0d | rn_4d | OK | 3.9367  | 17.9074 | -2.73526 | 0.00623313  |
| <i>Bsn</i>      | -2.40495 | TCONS_00079900 | NM_019146    | chr8:116227801-116319071 | rn_0d | rn_4d | OK | 2.77401 | 0.52378 | 2.07338  | 0.0381367   |
| <i>Myd88</i>    | 2.6627   | TCONS_00079988 | NM_198130    | chr8:127229272-127233342 | rn_0d | rn_4d | OK | 3.14407 | 19.9089 | -3.66286 | 0.000249417 |
| <i>Lrg1</i>     | 2.06556  | TCONS_00083278 | NM_001009717 | chr9:9939322-9941615     | rn_0d | rn_4d | OK | 5.38134 | 22.5261 | -2.43525 | 0.0148814   |
| <i>Col3a1</i>   | 2.45367  | TCONS_00083536 | NM_032085    | chr9:51689491-51725418   | rn_0d | rn_4d | OK | 42.0785 | 230.509 | -3.94598 | 7.95E-05    |

|                 |           |                |                   |                          |       |       |    |          |          |           |              |
|-----------------|-----------|----------------|-------------------|--------------------------|-------|-------|----|----------|----------|-----------|--------------|
| <i>Nabp1</i>    | 2. 43305  | TCONS_00083565 | NM_001014216      | chr9:54749791-54759565   | rn_0d | rn_4d | OK | 1. 19272 | 6. 44107 | -2. 09058 | 0. 0365653   |
| <i>Slc11a1</i>  | 4. 55581  | TCONS_00083708 | NM_001031658      | chr9:81420420-81431333   | rn_0d | rn_4d | OK | 0. 33052 | 7. 77382 | -2. 16342 | 0. 0305088   |
| <i>B3gnt7</i>   | 3. 318    | TCONS_00083813 | NM_001012134      | chr9:93055877-93059829   | rn_0d | rn_4d | OK | 1. 26414 | 12. 607  | -3. 81867 | 0. 000134174 |
| <i>Inpp5d</i>   | 2. 77337  | TCONS_00083834 | NM_019311         | chr9:94464378-94569988   | rn_0d | rn_4d | OK | 2. 6672  | 18. 2357 | -4. 01665 | 5. 90E-05    |
| <i>Ugt1a7c</i>  | 3. 6694   | TCONS_00083846 | NM_130407         | chr9:94880264-94990037   | rn_0d | rn_4d | OK | 2. 38606 | 30. 3586 | -3. 36456 | 0. 00076665  |
| <i>Ugt1a6</i>   | 3. 32521  | TCONS_00083847 | NM_001039691      | chr9:94880264-94990037   | rn_0d | rn_4d | OK | 1. 24448 | 12. 4731 | -2. 24759 | 0. 0246026   |
| <i>Twist2</i>   | 2. 24028  | TCONS_00083893 | NM_021691         | chr9:98599200-98642827   | rn_0d | rn_4d | OK | 0. 38481 | 1. 81818 | -2. 16913 | 0. 0300729   |
| <i>Man2a1</i>   | 2. 80279  | TCONS_00083952 | NM_012979         | chr9:111831032-111987870 | rn_0d | rn_4d | OK | 0. 83834 | 5. 84985 | -2. 1487  | 0. 0316585   |
| <i>Emr1</i>     | 3. 57691  | TCONS_00084013 | NM_001007557      | chr9:8434334-8593088     | rn_0d | rn_4d | OK | 3. 51886 | 41. 9914 | -5. 28233 | 1. 28E-07    |
| <i>Tnfsf9</i>   | 2. 41354  | TCONS_00084019 | NM_181384         | chr9:8913003-8915338     | rn_0d | rn_4d | OK | 0. 57339 | 3. 05489 | -2. 03818 | 0. 0415319   |
| <i>Ebi3</i>     | 4. 15439  | TCONS_00084056 | NM_001109421      | chr9:10095998-10108948   | rn_0d | rn_4d | OK | 0. 36737 | 6. 54176 | -2. 65922 | 0. 00783216  |
| <i>Fn1</i>      | 3. 18453  | TCONS_00084394 | NM_019143         | chr9:78674306-78743650   | rn_0d | rn_4d | OK | 5. 73283 | 52. 1203 | -3. 34885 | 0. 000811472 |
| <i>Tgif1</i>    | 3. 26428  | TCONS_00084580 | NM_001015020      | chr9:118636333-118646034 | rn_0d | rn_4d | OK | 0. 84882 | 8. 15577 | -2. 16953 | 0. 0300427   |
| <i>Cfp</i>      | 2. 23688  | TCONS_00086975 | NM_001106757      | chrX:2125792-2131704     | rn_0d | rn_4d | OK | 3. 6469  | 17. 1906 | -2. 14603 | 0. 0318705   |
| <i>Was</i>      | 3. 7516   | TCONS_00087033 | NM_001108248      | chrX:15938007-15946861   | rn_0d | rn_4d | OK | 1. 20449 | 16. 2236 | -4. 27632 | 1. 90E-05    |
| <i>Plp2</i>     | 3. 22907  | TCONS_00087052 | NM_207601         | chrX:16470479-16484448   | rn_0d | rn_4d | OK | 5. 76965 | 54. 1001 | -3. 6858  | 0. 000227984 |
| <i>Sat1</i>     | 2. 34187  | TCONS_00087183 | NM_001007667      | chrX:43930759-43934047   | rn_0d | rn_4d | OK | 43. 5863 | 220. 965 | -2. 86767 | 0. 00413506  |
| <i>RGD15657</i> | 4. 19861  | TCONS_00087209 | NM_001109318      | chrX:54590576-54609310   | rn_0d | rn_4d | OK | 0. 39527 | 7. 25779 | -4. 61495 | 3. 93E-06    |
| <i>Dmrt1c2</i>  | 3. 54587  | TCONS_00087292 | NM_001014222      | chrX:73522587-73529808   | rn_0d | rn_4d | OK | 0. 08088 | 0. 94459 | -2. 83609 | 0. 00456697  |
| <i>Dnajc22</i>  | 2. 93606  | TCONS_00087420 | NM_001014204      | chrX:115286779-115291902 | rn_0d | rn_4d | OK | 0. 59757 | 4. 57332 | -2. 95268 | 0. 00315033  |
| <i>Aqp5</i>     | 3. 78142  | TCONS_00087428 | NM_012779         | chrX:115753752-115757279 | rn_0d | rn_4d | OK | 0. 03192 | 0. 43898 | -2. 18399 | 0. 0289629   |
| <i>Htr2c</i>    | -2. 5393  | TCONS_00087445 | NM_012765         | chrX:118225691-118460831 | rn_0d | rn_4d | OK | 25. 8291 | 4. 44329 | 2. 71769  | 0. 00657388  |
| <i>I113ral</i>  | 2. 74018  | TCONS_00087462 | NM_145789         | chrX:122873687-122933122 | rn_0d | rn_4d | OK | 2. 96069 | 19. 782  | -3. 3216  | 0. 000895044 |
| <i>Sash3</i>    | 3. 51836  | TCONS_00087506 | NM_001134992      | chrX:135052968-135067691 | rn_0d | rn_4d | OK | 0. 74142 | 8. 49567 | -4. 02972 | 5. 58E-05    |
| <i>Po1a1</i>    | 2. 11528  | TCONS_00087806 | NM_053479         | chrX:62976408-63291768   | rn_0d | rn_4d | OK | 0. 80288 | 3. 47866 | -2. 42128 | 0. 015466    |
| <i>I12rg</i>    | 2. 89789  | TCONS_00087854 | NM_080889         | chrX:72017854-72021565   | rn_0d | rn_4d | OK | 0. 9788  | 7. 29538 | -3. 21292 | 0. 00131394  |
| <i>Ercc61</i>   | 2. 95037  | TCONS_00087861 | NM_001098674      | chrX:72862520-72878439   | rn_0d | rn_4d | OK | 0. 15293 | 1. 18208 | -2. 81576 | 0. 00486616  |
| <i>Cited1</i>   | -2. 08559 | TCONS_00087864 | NM_172055         | chrX:72970881-72975577   | rn_0d | rn_4d | OK | 4. 37228 | 1. 03011 | 2. 04299  | 0. 0410536   |
| 7d vs. 0d       |           |                |                   |                          |       |       |    |          |          |           |              |
| <i>Lin7b</i>    | -4. 59585 | TCONS_00003171 | NM_021758         | chr1:102421969-102425010 | rn_0d | rn_7d | OK | 20. 6166 | 0. 85256 | 2. 17118  | 0. 0299177   |
| <i>LOC10012</i> | -4. 47686 | TCONS_00079461 | NM_001103354      | chr8:55821931-55828684   | rn_0d | rn_7d | OK | 13. 2386 | 0. 59453 | 2. 57117  | 0. 0101355   |
| <i>Olig3</i>    | -4. 29166 | TCONS_00000043 | NM_001106269      | chr1:16343567-16345637   | rn_0d | rn_7d | OK | 0. 50363 | 0. 02572 | 2. 67919  | 0. 00738007  |
| <i>Gls2</i>     | -3. 77509 | TCONS_00072787 | NM_001270787      | chr7:2584593-2600729     | rn_0d | rn_7d | OK | 6. 80807 | 0. 49729 | 2. 24977  | 0. 0244633   |
| <i>Olfm2</i>    | -3. 77038 | TCONS_00079170 | NM_001015017      | chr8:21740367-21818097   | rn_0d | rn_7d | OK | 18. 4386 | 1. 35124 | 2. 0342   | 0. 041931    |
| <i>Sptssb</i>   | -3. 75862 | TCONS_00044247 | NM_001271301      | chr2:186020417-186049284 | rn_0d | rn_7d | OK | 5. 5165  | 0. 40757 | 2. 87206  | 0. 00407805  |
| <i>Chrn4</i>    | -3. 64797 | TCONS_00079482 | NM_052806         | chr8:58192374-58210959   | rn_0d | rn_7d | OK | 0. 43452 | 0. 03466 | 2. 24221  | 0. 0249476   |
| <i>Cntnap1</i>  | -3. 56463 | TCONS_00012906 | NM_032061         | chr10:88888135-88902111  | rn_0d | rn_7d | OK | 37. 9243 | 3. 20521 | 3. 90433  | 9. 45E-05    |
| <i>MAST1</i>    | -3. 56002 | TCONS_00040689 | NM_181089         | chr19:37001474-37037658  | rn_0d | rn_7d | OK | 8. 11203 | 0. 68779 | 2. 24975  | 0. 024465    |
| <i>Slc45a3</i>  | -3. 54706 | TCONS_00023949 | NM_001135868      | chr13:53816773-53837091  | rn_0d | rn_7d | OK | 7. 82471 | 0. 66942 | 2. 00133  | 0. 0453568   |
| <i>Kcnc3</i>    | -3. 53715 | TCONS_00000791 | NM_053997         | chr1:101659055-101673260 | rn_0d | rn_7d | OK | 74. 1296 | 6. 38561 | 5. 64124  | 1. 69E-08    |
| <i>Zmat4</i>    | -3. 44224 | TCONS_00033241 | NM_001134747      | chr16:72402515-72791491  | rn_0d | rn_7d | OK | 4. 41347 | 0. 40603 | 2. 69147  | 0. 00711369  |
| <i>Lrfn5</i>    | -3. 41484 | TCONS_00069132 | NM_001108024      | chr6:92601227-92958936   | rn_0d | rn_7d | OK | 5. 11169 | 0. 47929 | 2. 26231  | 0. 0236784   |
| <i>Slc12a5</i>  | -3. 39063 | TCONS_00052384 | NM_134363         | chr3:167610351-167650178 | rn_0d | rn_7d | OK | 31. 4684 | 3. 0005  | 3. 0694   | 0. 00214489  |
| <i>LOC28716</i> | -3. 37946 | TCONS_00013450 | NM_001013853      | chr10:15472342-15473071  | rn_0d | rn_7d | OK | 3. 49643 | 0. 33597 | 2. 5033   | 0. 0123042   |
| <i>Hapln4</i>   | -3. 37169 | TCONS_00033066 | NM_001108398_dup1 | chr16:20994298-21005078  | rn_0d | rn_7d | OK | 28. 2875 | 2. 73284 | 4. 8759   | 1. 08E-06    |

|                |          |                |                   |                          |       |       |    |         |         |         |             |
|----------------|----------|----------------|-------------------|--------------------------|-------|-------|----|---------|---------|---------|-------------|
| <i>Hapln4</i>  | -3.36669 | TCONS_00033064 | NM_001108398      | chr16:20931164-20939015  | rn_0d | rn_7d | OK | 28.1896 | 2.73284 | 4.86835 | 1.13E-06    |
| <i>Elavl2</i>  | -3.32469 | TCONS_00064601 | NM_173309         | chr5:113450847-113600984 | rn_0d | rn_7d | OK | 11.0522 | 1.10311 | 2.6302  | 0.00853352  |
| <i>Crtac1</i>  | -3.31446 | TCONS_00004558 | NM_134401         | chr1:268979487-269122222 | rn_0d | rn_7d | OK | 19.4154 | 1.95162 | 3.2977  | 0.000974811 |
| <i>Cox8b</i>   | -3.2677  | TCONS_00004060 | NM_012786         | chr1:220574320-220575781 | rn_0d | rn_7d | OK | 2.76826 | 0.28743 | 1.9879  | 0.0468228   |
| <i>Ckmt2</i>   | -3.25633 | TCONS_00043789 | NM_001127652      | chr2:40627923-40657402   | rn_0d | rn_7d | OK | 0.41268 | 0.04319 | 1.98098 | 0.0475937   |
| <i>P2rx6</i>   | -3.24286 | TCONS_00018955 | NM_012721         | chr11:90486112-90501226  | rn_0d | rn_7d | OK | 11.3166 | 1.19541 | 2.35112 | 0.0187172   |
| <i>Entpd3</i>  | -3.2366  | TCONS_00078996 | NM_178106         | chr8:128399673-128430988 | rn_0d | rn_7d | OK | 7.27282 | 0.7716  | 3.33408 | 0.000855821 |
| <i>Rph3a</i>   | -3.23047 | TCONS_00021434 | NM_133518         | chr12:42904280-43014183  | rn_0d | rn_7d | OK | 24.765  | 2.63858 | 2.65847 | 0.00784962  |
| <i>Hoxd10</i>  | -3.22594 | TCONS_00051556 | NM_001107094      | chr3:68080468-68083678   | rn_0d | rn_7d | OK | 0.71801 | 0.07674 | 2.62609 | 0.00863732  |
| <i>Slc7a10</i> | -3.21875 | TCONS_00000721 | NM_053726         | chr1:92563399-92593301   | rn_0d | rn_7d | OK | 31.5179 | 3.38546 | 2.53983 | 0.0110908   |
| <i>Agbl4</i>   | -3.21218 | TCONS_00063602 | NM_001100981      | chr5:134032117-134238136 | rn_0d | rn_7d | OK | 1.55091 | 0.16735 | 2.11906 | 0.0340852   |
| <i>Gabra1</i>  | -3.16196 | TCONS_00013508 | NM_183326         | chr10:27154443-27209873  | rn_0d | rn_7d | OK | 10.049  | 1.12274 | 2.76731 | 0.00565204  |
| <i>Klhdc8a</i> | -3.14831 | TCONS_00023952 | NM_001100683      | chr13:54143332-54151418  | rn_0d | rn_7d | OK | 6.12975 | 0.69136 | 3.34303 | 0.000828686 |
| <i>Thrsp</i>   | -3.13837 | TCONS_00003518 | NM_012703         | chr1:168587723-168592048 | rn_0d | rn_7d | OK | 30.4563 | 3.45886 | 4.24553 | 2.18E-05    |
| <i>Necab3</i>  | -3.12121 | TCONS_00053582 | NM_001098724      | chr3:156420460-156435016 | rn_0d | rn_7d | OK | 14.4688 | 1.66285 | 2.67595 | 0.00745172  |
| <i>Nrn1</i>    | -3.11561 | TCONS_00035650 | NM_053346         | chr17:29834673-29877118  | rn_0d | rn_7d | OK | 35.8443 | 4.1355  | 4.22683 | 2.37E-05    |
| <i>Neurod6</i> | -3.10733 | TCONS_00059282 | NM_001109237      | chr4:150564265-150567512 | rn_0d | rn_7d | OK | 2.46368 | 0.28588 | 3.26441 | 0.00109691  |
| <i>Kcnc1</i>   | -3.09571 | TCONS_00000854 | NM_012856         | chr1:103499688-103541771 | rn_0d | rn_7d | OK | 21.0069 | 2.45731 | 2.90499 | 0.00367269  |
| <i>Camkk1</i>  | -3.08765 | TCONS_00012463 | NM_031662         | chr10:59324560-59347636  | rn_0d | rn_7d | OK | 19.038  | 2.23948 | 2.47558 | 0.0133019   |
| <i>Lamp5</i>   | -3.08269 | TCONS_00052085 | NM_001014183      | chr3:135507574-135519611 | rn_0d | rn_7d | OK | 91.7816 | 10.8336 | 4.31193 | 1.62E-05    |
| <i>Ccdc92</i>  | -3.0536  | TCONS_00021348 | NM_001083898      | chr12:39084715-39112065  | rn_0d | rn_7d | OK | 24.3656 | 2.93462 | 2.11357 | 0.0345524   |
| <i>Zfx4</i>    | -3.04742 | TCONS_00044054 | NM_001191702      | chr2:118157673-118345227 | rn_0d | rn_7d | OK | 0.6176  | 0.0747  | 2.09643 | 0.036044    |
| <i>Nefh</i>    | -3.04267 | TCONS_00027613 | NM_012607         | chr14:85859192-85869178  | rn_0d | rn_7d | OK | 260.718 | 31.6398 | 4.21739 | 2.47E-05    |
| <i>Trhr</i>    | -3.04036 | TCONS_00073284 | NM_013047         | chr7:83121164-83161215   | rn_0d | rn_7d | OK | 2.98719 | 0.3631  | 2.81339 | 0.00490228  |
| <i>Kifc2</i>   | -3.02275 | TCONS_00073404 | NM_198752         | chr7:117708994-117720470 | rn_0d | rn_7d | OK | 16.8288 | 2.07069 | 2.50603 | 0.0122096   |
| <i>Tmem25</i>  | -2.99601 | TCONS_00079385 | NM_001109528      | chr8:47719266-47724850   | rn_0d | rn_7d | OK | 8.41497 | 1.05478 | 2.13672 | 0.0326208   |
| <i>Fibcd1</i>  | -2.9837  | TCONS_00051292 | NM_001107829      | chr3:14725660-14759373   | rn_0d | rn_7d | OK | 0.82008 | 0.10367 | 3.08705 | 0.00202157  |
| <i>Fibcd1</i>  | -2.9837  | TCONS_00051302 | NM_001107829_dup1 | chr3:15357856-15391567   | rn_0d | rn_7d | OK | 0.82008 | 0.10367 | 3.08705 | 0.00202157  |
| <i>Chrm3</i>   | -2.97401 | TCONS_00035805 | NM_012527         | chr17:65753664-66217211  | rn_0d | rn_7d | OK | 2.68128 | 0.34125 | 2.61678 | 0.00887646  |
| <i>Pvalb</i>   | -2.94715 | TCONS_00074504 | NM_022499         | chr7:119420314-119433347 | rn_0d | rn_7d | OK | 76.1045 | 9.86802 | 2.93123 | 0.00337623  |
| <i>Plcx2</i>   | -2.91983 | TCONS_00018718 | NM_001134481      | chr11:60371795-60423722  | rn_0d | rn_7d | OK | 7.79221 | 1.02968 | 3.01612 | 0.00256029  |
| <i>Zfyve28</i> | -2.89661 | TCONS_00027010 | NM_001107227      | chr14:82412058-82497078  | rn_0d | rn_7d | OK | 6.51239 | 0.87453 | 2.46227 | 0.0138061   |
| <i>Scn4b</i>   | -2.89541 | TCONS_00078337 | NM_001008880      | chr8:48067554-48082728   | rn_0d | rn_7d | OK | 79.4907 | 10.6834 | 4.80651 | 1.54E-06    |
| <i>Fam57b</i>  | -2.8636  | TCONS_00001515 | NM_001106296      | chr1:205239663-205246008 | rn_0d | rn_7d | OK | 40.0396 | 5.50123 | 4.06453 | 4.81E-05    |
| <i>Cited1</i>  | -2.85238 | TCONS_00087864 | NM_172055         | chrX:72970881-72975577   | rn_0d | rn_7d | OK | 4.37228 | 0.60542 | 2.63129 | 0.00850617  |
| <i>Sptssb</i>  | -2.84193 | TCONS_00044246 | NM_001271299      | chr2:186020417-186049284 | rn_0d | rn_7d | OK | 3.59639 | 0.50161 | 2.25715 | 0.0239985   |
| <i>Cacna1a</i> | -2.84068 | TCONS_00040198 | NM_012918         | chr19:36502302-36727039  | rn_0d | rn_7d | OK | 8.35324 | 1.16607 | 2.48346 | 0.0130113   |
| <i>Calb2</i>   | -2.83123 | TCONS_00040343 | NM_053988         | chr19:52310582-52337705  | rn_0d | rn_7d | OK | 75.5134 | 10.6106 | 3.85884 | 0.000113928 |
| <i>Sez6l2</i>  | -2.82919 | TCONS_00001519 | NM_001107550      | chr1:205340999-205383934 | rn_0d | rn_7d | OK | 34.5533 | 4.86204 | 2.93943 | 0.00328818  |
| <i>Kdm4d</i>   | -2.8112  | TCONS_00079099 | NM_001079712      | chr8:12913537-12938997   | rn_0d | rn_7d | OK | 1.05063 | 0.14969 | 2.75855 | 0.00580585  |
| <i>Lynx1</i>   | -2.79652 | TCONS_00074404 | NM_001130546      | chr7:115888267-115893471 | rn_0d | rn_7d | OK | 79.429  | 11.4325 | 4.66212 | 3.13E-06    |
| <i>Ube2ql1</i> | -2.79612 | TCONS_00000165 | NM_001145163      | chr1:37582311-37622672   | rn_0d | rn_7d | OK | 28.0732 | 4.04181 | 3.09878 | 0.00194322  |
| <i>Hmgcs1</i>  | -2.78688 | TCONS_00042769 | NM_012768         | chr2:70791143-70809191   | rn_0d | rn_7d | OK | 230.438 | 33.3902 | 3.41511 | 0.000637557 |
| <i>Cbln1</i>   | -2.78199 | TCONS_00040137 | NM_001109127      | chr19:31617536-31621724  | rn_0d | rn_7d | OK | 11.1396 | 1.6196  | 2.31443 | 0.020644    |
| <i>Hlxb9</i>   | -2.77102 | TCONS_00058916 | NM_001271274      | chr4:2429079-2434037     | rn_0d | rn_7d | OK | 0.77031 | 0.11285 | 2.3713  | 0.0177254   |



|                |          |                |                   |                          |       |       |    |         |         |         |             |
|----------------|----------|----------------|-------------------|--------------------------|-------|-------|----|---------|---------|---------|-------------|
| <i>Atp2b2</i>  | -2.757   | TCONS_00059530 | NM_012508         | chr4:208999219-209310124 | rn_0d | rn_7d | OK | 20.7026 | 3.06256 | 2.55297 | 0.0106807   |
| <i>Slc17a6</i> | -2.70542 | TCONS_00006045 | NM_053427         | chr1:108022507-108080511 | rn_0d | rn_7d | OK | 29.1234 | 4.46507 | 3.15922 | 0.0015819   |
| <i>Ckmt1b</i>  | -2.70049 | TCONS_00051929 | NM_001012738      | chr3:119858848-119864004 | rn_0d | rn_7d | OK | 164.151 | 25.2531 | 4.44663 | 8.72E-06    |
| <i>Galnt9</i>  | -2.68023 | TCONS_00022068 | NM_001122644      | chr12:53844712-53922236  | rn_0d | rn_7d | OK | 11.2447 | 1.75436 | 2.98162 | 0.00286729  |
| <i>Chn1</i>    | -2.67435 | TCONS_00052937 | NM_032083         | chr3:66992181-67121549   | rn_0d | rn_7d | OK | 26.6905 | 4.18118 | 2.43094 | 0.0150599   |
| <i>Slc27a2</i> | -2.67434 | TCONS_00051983 | NM_031736         | chr3:125542771-125580197 | rn_0d | rn_7d | OK | 3.35667 | 0.52584 | 2.5444  | 0.0109466   |
| <i>Aifm3</i>   | -2.66894 | TCONS_00018952 | NM_001013977      | chr11:90415867-90432538  | rn_0d | rn_7d | OK | 12.2303 | 1.92312 | 2.47911 | 0.013171    |
| <i>Mapk9</i>   | -2.66296 | TCONS_00012098 | NM_001270544      | chr10:35105632-35146138  | rn_0d | rn_7d | OK | 33.3867 | 5.27163 | 2.40219 | 0.0162971   |
| <i>Fst15</i>   | -2.66108 | TCONS_00043149 | NM_001271195      | chr2:193886878-194578417 | rn_0d | rn_7d | OK | 8.81651 | 1.3939  | 3.28182 | 0.00103139  |
| <i>Vsn11</i>   | -2.65197 | TCONS_00069785 | NM_012686         | chr6:46751472-46872211   | rn_0d | rn_7d | OK | 219.684 | 34.9522 | 4.45891 | 8.24E-06    |
| <i>Ina</i>     | -2.64202 | TCONS_00002242 | NM_019128         | chr1:274212014-274224831 | rn_0d | rn_7d | OK | 58.3093 | 9.34138 | 3.70035 | 0.000215302 |
| <i>Cabp7</i>   | -2.62821 | TCONS_00027610 | NM_001007730      | chr14:85614854-85655131  | rn_0d | rn_7d | OK | 59.6999 | 9.65616 | 3.96897 | 7.22E-05    |
| <i>Aacs</i>    | -2.60416 | TCONS_00021879 | NM_023104         | chr12:38381584-38425067  | rn_0d | rn_7d | OK | 41.1162 | 6.76214 | 3.72467 | 0.000195573 |
| <i>Kcng4</i>   | -2.60055 | TCONS_00040855 | NM_001107435      | chr19:63018205-63031288  | rn_0d | rn_7d | OK | 10.2847 | 1.6957  | 2.37182 | 0.0177008   |
| <i>Slc32a1</i> | -2.5953  | TCONS_00053644 | NM_031782         | chr3:160500061-160504727 | rn_0d | rn_7d | OK | 52.2952 | 8.65363 | 3.92658 | 8.62E-05    |
| <i>Nefm</i>    | -2.59412 | TCONS_00029975 | NM_017029         | chr15:46736795-46741631  | rn_0d | rn_7d | OK | 461.759 | 76.473  | 3.73711 | 0.000186146 |
| <i>Idi1</i>    | -2.55732 | TCONS_00035790 | NM_053539         | chr17:59781713-59855683  | rn_0d | rn_7d | OK | 60.7162 | 10.3152 | 3.17285 | 0.00150951  |
| <i>Mpped1</i>  | -2.54784 | TCONS_00073524 | NM_001130569      | chr7:124671297-124740991 | rn_0d | rn_7d | OK | 14.7952 | 2.53014 | 3.54914 | 0.000386485 |
| <i>Gna14</i>   | -2.54247 | TCONS_00002018 | NM_001013151      | chr1:242484561-242666216 | rn_0d | rn_7d | OK | 2.0791  | 0.35687 | 2.1066  | 0.0351527   |
| <i>Kcnj6</i>   | -2.53152 | TCONS_00019084 | NM_013192         | chr11:38602453-38852574  | rn_0d | rn_7d | OK | 2.02083 | 0.34952 | 2.8277  | 0.00468835  |
| <i>Nmbr</i>    | -2.52477 | TCONS_00000029 | NM_012799         | chr1:10550180-10560850   | rn_0d | rn_7d | OK | 2.29894 | 0.39948 | 2.51026 | 0.0120644   |
| <i>Crhbp</i>   | -2.50976 | TCONS_00043815 | NM_139183         | chr2:44299506-44311225   | rn_0d | rn_7d | OK | 1.67915 | 0.29484 | 2.53804 | 0.0111476   |
| <i>Htr2c</i>   | -2.49046 | TCONS_00087445 | NM_012765         | chrX:118225691-118460831 | rn_0d | rn_7d | OK | 25.8291 | 4.59628 | 2.92827 | 0.00340853  |
| <i>Atp1a3</i>  | -2.47507 | TCONS_00002865 | NM_012506         | chr1:83104724-83133845   | rn_0d | rn_7d | OK | 378.99  | 68.1642 | 3.94835 | 7.87E-05    |
| <i>Sncb</i>    | -2.46985 | TCONS_00035064 | NM_080777         | chr17:12510520-12518728  | rn_0d | rn_7d | OK | 174.874 | 31.5666 | 4.03061 | 5.56E-05    |
| <i>Chgb</i>    | -2.44787 | TCONS_00052073 | NM_012526         | chr3:131912037-131925378 | rn_0d | rn_7d | OK | 46.7179 | 8.56251 | 2.79362 | 0.00521216  |
| <i>Hoxd1</i>   | -2.44296 | TCONS_00051566 | NM_001105884      | chr3:68151155-68153295   | rn_0d | rn_7d | OK | 2.38939 | 0.43942 | 2.59112 | 0.00956642  |
| <i>Sult4a1</i> | -2.43889 | TCONS_00074621 | NM_031641         | chr7:124946960-124970976 | rn_0d | rn_7d | OK | 134.016 | 24.716  | 4.09684 | 4.19E-05    |
| <i>Bsn</i>     | -2.43043 | TCONS_00079900 | NM_019146         | chr8:116227801-116319071 | rn_0d | rn_7d | OK | 2.77401 | 0.51461 | 2.43554 | 0.0148696   |
| <i>Spire2</i>  | -2.42099 | TCONS_00040469 | NM_001127538      | chr19:66847907-66886394  | rn_0d | rn_7d | OK | 14.1819 | 2.64817 | 3.28739 | 0.00101122  |
| <i>Dnm1</i>    | -2.42021 | TCONS_00052709 | NM_080689         | chr3:16686950-16736714   | rn_0d | rn_7d | OK | 96.8867 | 18.1012 | 2.46543 | 0.0136848   |
| <i>Ache</i>    | -2.41765 | TCONS_00021784 | NM_172009         | chr12:24484050-24492379  | rn_0d | rn_7d | OK | 55.1962 | 10.3306 | 2.24046 | 0.0250612   |
| <i>Gria4</i>   | -2.41414 | TCONS_00079074 | NM_001113185      | chr8:1541142-2069664     | rn_0d | rn_7d | OK | 21.9615 | 4.12035 | 2.05627 | 0.0397566   |
| <i>Gira2</i>   | -2.41312 | TCONS_00087728 | NM_012568         | chrX:30995484-31214065   | rn_0d | rn_7d | OK | 2.96623 | 0.55691 | 2.12117 | 0.0339072   |
| <i>Map1b</i>   | -2.41062 | TCONS_00043843 | NM_019217         | chr2:48837123-48930483   | rn_0d | rn_7d | OK | 65.1021 | 12.2441 | 2.08527 | 0.0370451   |
| <i>Ndrg4</i>   | -2.40973 | TCONS_00040536 | NM_031967         | chr19:9751516-9787020    | rn_0d | rn_7d | OK | 281.18  | 52.9155 | 3.30686 | 0.000943478 |
| <i>Fzd9</i>    | -2.40794 | TCONS_00021285 | NM_153305         | chr12:26471283-26473598  | rn_0d | rn_7d | OK | 9.01853 | 1.69931 | 3.03654 | 0.00239309  |
| <i>Abcb9</i>   | -2.3995  | TCONS_00021362 | NM_022238         | chr12:39796336-39829246  | rn_0d | rn_7d | OK | 13.5672 | 2.57139 | 2.78813 | 0.00530133  |
| <i>Gabbr2</i>  | -2.37967 | TCONS_00064432 | NM_031802         | chr5:66802347-67142203   | rn_0d | rn_7d | OK | 19.7021 | 3.78581 | 3.68415 | 0.00022947  |
| <i>Limk1</i>   | -2.37526 | TCONS_00021293 | NM_031727         | chr12:27037249-27070939  | rn_0d | rn_7d | OK | 57.9892 | 11.1769 | 3.35358 | 0.000797723 |
| <i>Slitrk1</i> | -2.35951 | TCONS_00030646 | NM_001107283      | chr15:96793132-96797460  | rn_0d | rn_7d | OK | 9.18437 | 1.78964 | 2.53432 | 0.0112665   |
| <i>Grin1</i>   | -2.35677 | TCONS_00052551 | NM_001270608      | chr3:2487838-2516076     | rn_0d | rn_7d | OK | 32.2619 | 6.29841 | 2.81256 | 0.00491482  |
| <i>Phyhip</i>  | -2.34845 | TCONS_00030033 | NM_001017376_dup1 | chr15:55872253-55883800  | rn_0d | rn_7d | OK | 13.4946 | 2.64976 | 3.237   | 0.00120793  |
| <i>Phyhip</i>  | -2.34845 | TCONS_00030045 | NM_001017376      | chr15:56490751-56502001  | rn_0d | rn_7d | OK | 13.4946 | 2.64976 | 3.237   | 0.00120793  |
| <i>Syndig1</i> | -2.33911 | TCONS_00052163 | NM_001025020      | chr3:151405688-151571801 | rn_0d | rn_7d | OK | 10.6795 | 2.11062 | 2.42998 | 0.0150998   |



|                 |          |                |              |                          |       |       |    |         |         |         |             |
|-----------------|----------|----------------|--------------|--------------------------|-------|-------|----|---------|---------|---------|-------------|
| <i>Panx2</i>    | -2.32518 | TCONS_00073586 | NM_199409    | chr7:129728892-129738979 | rn_0d | rn_7d | OK | 41.5986 | 8.30099 | 3.50766 | 0.000452074 |
| <i>Nap112</i>   | -2.3093  | TCONS_00087873 | NM_001024789 | chrX:74802168-74804572   | rn_0d | rn_7d | OK | 45.5674 | 9.19358 | 3.57959 | 0.000344132 |
| <i>Ma12</i>     | -2.29921 | TCONS_00073301 | NM_198786    | chr7:94768726-94801524   | rn_0d | rn_7d | OK | 10.65   | 2.1638  | 3.03673 | 0.00239163  |
| <i>Tmem591</i>  | -2.26405 | TCONS_00032571 | NM_001271055 | chr16:20547456-20551180  | rn_0d | rn_7d | OK | 122.811 | 25.5676 | 3.70106 | 0.0002147   |
| <i>Tuba8</i>    | -2.26383 | TCONS_00058688 | NM_001024339 | chr4:220863727-220880882 | rn_0d | rn_7d | OK | 7.89928 | 1.64477 | 2.72794 | 0.0063732   |
| <i>Tmem179</i>  | -2.26188 | TCONS_00070247 | NM_001126280 | chr6:146081873-146092802 | rn_0d | rn_7d | OK | 34.4716 | 7.18735 | 3.03704 | 0.00238917  |
| <i>Trhde</i>    | -2.2549  | TCONS_00074140 | NM_001108991 | chr7:57265683-57694191   | rn_0d | rn_7d | OK | 1.81792 | 0.38088 | 2.5343  | 0.0112673   |
| <i>Grem2</i>    | -2.24528 | TCONS_00024806 | NM_001105974 | chr13:97359448-97453188  | rn_0d | rn_7d | OK | 7.62183 | 1.60754 | 3.02193 | 0.00251165  |
| <i>Adra2c</i>   | -2.24336 | TCONS_00027540 | NM_138506    | chr14:81422129-81423833  | rn_0d | rn_7d | OK | 5.74768 | 1.21387 | 2.59045 | 0.00958496  |
| <i>Six4</i>     | -2.24132 | TCONS_00069969 | NM_001106739 | chr6:105420179-105433841 | rn_0d | rn_7d | OK | 1.30074 | 0.2751  | 2.61336 | 0.00896559  |
| <i>Rel12</i>    | -2.22178 | TCONS_00037902 | NM_001014149 | chr18:30783004-30797093  | rn_0d | rn_7d | OK | 19.5974 | 4.20122 | 2.02997 | 0.0423595   |
| <i>Slc45a1</i>  | -2.21898 | TCONS_00065156 | NM_144747    | chr5:171300111-171322391 | rn_0d | rn_7d | OK | 21.5163 | 4.62156 | 2.90463 | 0.00367684  |
| <i>Insig1</i>   | -2.21751 | TCONS_00057808 | NM_022392    | chr4:337347-345816       | rn_0d | rn_7d | OK | 57.3192 | 12.3243 | 2.59035 | 0.00958797  |
| <i>Slc6a5</i>   | -2.21437 | TCONS_00000875 | NM_203334    | chr1:106333981-106385232 | rn_0d | rn_7d | OK | 15.109  | 3.2557  | 2.03439 | 0.0419124   |
| <i>Acss2</i>    | -2.2143  | TCONS_00052260 | NM_001107793 | chr3:157400420-157443341 | rn_0d | rn_7d | OK | 87.2295 | 18.7972 | 3.73374 | 0.000188657 |
| <i>Serpini1</i> | -2.19717 | TCONS_00043148 | NM_053779    | chr2:193348763-193446630 | rn_0d | rn_7d | OK | 29.7277 | 6.48258 | 3.3437  | 0.000826678 |
| <i>Rasgrf1</i>  | -2.17848 | TCONS_00078694 | NM_001170531 | chr8:96778439-96905933   | rn_0d | rn_7d | OK | 81.4729 | 17.998  | 3.66278 | 0.000249497 |
| <i>Dbndd1</i>   | -2.17256 | TCONS_00040915 | NM_001014156 | chr19:67012416-67021168  | rn_0d | rn_7d | OK | 8.80923 | 1.95403 | 2.40301 | 0.0162607   |
| <i>L1cam</i>    | -2.16429 | TCONS_00001092 | NM_017345    | chr1:152659412-152676122 | rn_0d | rn_7d | OK | 25.9757 | 5.79496 | 3.01958 | 0.00253122  |
| <i>Cb1n4</i>    | -2.14979 | TCONS_00053767 | NM_001109210 | chr3:176112390-176120178 | rn_0d | rn_7d | OK | 2.93669 | 0.66177 | 2.52436 | 0.011591    |
| <i>Magee1</i>   | -2.14962 | TCONS_00087315 | NM_001079891 | chrX:76881859-76885407   | rn_0d | rn_7d | OK | 35.4149 | 7.98153 | 3.40209 | 0.000668723 |
| <i>Cpne9</i>    | -2.14582 | TCONS_00058580 | NM_001024982 | chr4:208536077-208559594 | rn_0d | rn_7d | OK | 6.79001 | 1.53432 | 2.14671 | 0.031816    |
| <i>Tmem178b</i> | -2.13737 | TCONS_00058143 | NM_001195277 | chr4:67476251-67864207   | rn_0d | rn_7d | OK | 10.0638 | 2.28744 | 2.57996 | 0.00988122  |
| <i>Rab3a</i>    | -2.12478 | TCONS_00033029 | NM_013018    | chr16:20289806-20296274  | rn_0d | rn_7d | OK | 204.025 | 46.7798 | 3.25568 | 0.0011312   |
| <i>Myh10</i>    | -2.12433 | TCONS_00012339 | NM_031520    | chr10:55017045-55148297  | rn_0d | rn_7d | OK | 20.0725 | 4.60377 | 2.1971  | 0.0280133   |
| <i>Htr3a</i>    | -2.12291 | TCONS_00079428 | NM_024394    | chr8:51803896-51816207   | rn_0d | rn_7d | OK | 2.43588 | 0.55924 | 2.08705 | 0.0368835   |
| <i>Ngb</i>      | -2.1208  | TCONS_00070089 | NM_033359    | chr6:120412240-120417508 | rn_0d | rn_7d | OK | 9.45022 | 2.1728  | 2.02802 | 0.0425585   |
| <i>Epb4113</i>  | -2.11958 | TCONS_00083975 | NM_053927    | chr9:116783536-117131767 | rn_0d | rn_7d | OK | 50.3956 | 11.5967 | 2.87269 | 0.00406996  |
| <i>Rab9b</i>    | -2.11142 | TCONS_00087957 | NM_001109018 | chrX:107414929-107426468 | rn_0d | rn_7d | OK | 22.1446 | 5.12467 | 3.21637 | 0.00129823  |
| <i>Ppfia3</i>   | -2.10564 | TCONS_00003170 | NM_001270985 | chr1:102392069-102421097 | rn_0d | rn_7d | OK | 12.9254 | 3.00321 | 2.9093  | 0.00362244  |
| <i>Ppp1r14c</i> | -2.0972  | TCONS_00000177 | NM_133425    | chr1:41159897-41272170   | rn_0d | rn_7d | OK | 5.05877 | 1.1823  | 2.05384 | 0.0399916   |
| <i>Olfm3</i>    | -2.09042 | TCONS_00043545 | NM_145777    | chr2:235877537-236098572 | rn_0d | rn_7d | OK | 6.16719 | 1.44813 | 2.15887 | 0.0308605   |
| <i>Necab2</i>   | -2.08587 | TCONS_00040417 | NM_133415    | chr19:62834864-62861145  | rn_0d | rn_7d | OK | 14.8768 | 3.5043  | 2.19433 | 0.028212    |
| <i>Nxph4</i>    | -2.08065 | TCONS_00074230 | NM_021680    | chr7:71006676-71014869   | rn_0d | rn_7d | OK | 10.4439 | 2.46902 | 2.56124 | 0.01043     |
| <i>Abcc8</i>    | -2.0773  | TCONS_00003209 | NM_013039    | chr1:103194418-103275525 | rn_0d | rn_7d | OK | 3.84594 | 0.91132 | 2.16323 | 0.0305238   |
| <i>Crabp1</i>   | -2.07288 | TCONS_00078427 | NM_001105716 | chr8:57926232-57934271   | rn_0d | rn_7d | OK | 6.42403 | 1.5269  | 2.32351 | 0.0201519   |
| <i>Vamp1</i>    | -2.0702  | TCONS_00058761 | NM_013090    | chr4:224743850-224750440 | rn_0d | rn_7d | OK | 423.354 | 100.812 | 3.39303 | 0.00069123  |
| <i>Cnr1</i>     | -2.06836 | TCONS_00063270 | NM_012784    | chr5:53880021-53904203   | rn_0d | rn_7d | OK | 8.85347 | 2.11094 | 2.52461 | 0.0115827   |
| <i>Fb111</i>    | -2.06321 | TCONS_00013497 | NM_001108824 | chr10:20494592-20496236  | rn_0d | rn_7d | OK | 11.7997 | 2.82347 | 2.62553 | 0.00865143  |
| <i>Ccdc126</i>  | -2.05912 | TCONS_00058253 | NM_001109232 | chr4:143671022-143692062 | rn_0d | rn_7d | OK | 10.3986 | 2.49527 | 2.42351 | 0.0153714   |
| <i>Jakmip1</i>  | -2.05904 | TCONS_00027512 | NM_001033894 | chr14:78372406-78495837  | rn_0d | rn_7d | OK | 10.3931 | 2.4941  | 2.13181 | 0.0330228   |
| <i>Pygm</i>     | -2.05237 | TCONS_00001882 | NM_012638    | chr1:228744113-228758931 | rn_0d | rn_7d | OK | 56.1639 | 13.5404 | 3.11857 | 0.00181731  |
| <i>Tmem35</i>   | -2.04443 | TCONS_00087353 | NM_001001799 | chrX:105015269-105038197 | rn_0d | rn_7d | OK | 39.829  | 9.65528 | 3.07968 | 0.00207222  |
| <i>Kcnh2</i>    | -2.03766 | TCONS_00057881 | NM_053949    | chr4:7366963-7398604     | rn_0d | rn_7d | OK | 19.808  | 4.8244  | 2.73151 | 0.00630454  |
| <i>Zcchc12</i>  | -2.03519 | TCONS_00087465 | NM_001014065 | chrX:122958303-122961547 | rn_0d | rn_7d | OK | 19.9605 | 4.86989 | 2.01882 | 0.0435059   |

|                 |          |                |                   |                           |       |       |    |         |         |          |             |
|-----------------|----------|----------------|-------------------|---------------------------|-------|-------|----|---------|---------|----------|-------------|
| <i>Wnt3</i>     | -2.03097 | TCONS_00012969 | NM_001105715      | chr10:91597105-91641213   | rn_0d | rn_7d | OK | 0.69121 | 0.16913 | 2.05852  | 0.0395404   |
| <i>Grifin</i>   | -2.02728 | TCONS_00021177 | NM_057187         | chr12:18164010-18165993   | rn_0d | rn_7d | OK | 12.0063 | 2.94535 | 2.32557  | 0.0200416   |
| <i>Cend1</i>    | -2.0239  | TCONS_00004071 | NM_001014163      | chr1:220887395-220890392  | rn_0d | rn_7d | OK | 60.5077 | 14.8783 | 3.21653  | 0.00129751  |
| <i>Cend1</i>    | -2.02299 | TCONS_00004092 | NM_001014163_dup1 | chr1:221324184-221327181  | rn_0d | rn_7d | OK | 60.6672 | 14.927  | 3.2162   | 0.00129898  |
| <i>Cpneb</i>    | -2.01717 | TCONS_00029885 | NM_001191113      | chr15:38077742-38084718   | rn_0d | rn_7d | OK | 18.7744 | 4.63806 | 2.39742  | 0.0165109   |
| <i>Pla2g3</i>   | -2.01532 | TCONS_00027048 | NM_001106015      | chr14:84412831-84418680   | rn_0d | rn_7d | OK | 14.9355 | 3.69443 | 2.07491  | 0.0379945   |
| <i>Tmem130</i>  | -2.0009  | TCONS_00021124 | NM_001170399      | chr12:13876609-13900957   | rn_0d | rn_7d | OK | 113.298 | 28.3068 | 3.42646  | 0.000611505 |
| <i>Mmp23</i>    | 2.00094  | TCONS_00065211 | NM_053606         | chr5:176554524-176557355  | rn_0d | rn_7d | OK | 2.17297 | 8.69754 | -2.26612 | 0.0234441   |
| <i>Dse</i>      | 2.00177  | TCONS_00049594 | NM_001108933      | chr20:29528499-29603741   | rn_0d | rn_7d | OK | 1.47615 | 5.91182 | -2.00725 | 0.0447226   |
| <i>Mfap4</i>    | 2.0052   | TCONS_00012273 | NM_001034124      | chr10:47538039-47540978   | rn_0d | rn_7d | OK | 9.23605 | 37.0777 | -2.89008 | 0.00385141  |
| <i>Mfap4</i>    | 2.0052   | TCONS_00012297 | NM_001034124_dup1 | chr10:48785655-48788594   | rn_0d | rn_7d | OK | 9.23605 | 37.0777 | -2.89008 | 0.00385141  |
| <i>Efna4</i>    | 2.00555  | TCONS_00044384 | NM_001107692      | chr2:208065968-208070220  | rn_0d | rn_7d | OK | 0.56283 | 2.26002 | -2.11605 | 0.0343408   |
| <i>Cenpm</i>    | 2.00681  | TCONS_00074586 | NM_001130504      | chr7:123449520-123460809  | rn_0d | rn_7d | OK | 1.49074 | 5.99117 | -2.25025 | 0.0244331   |
| <i>Adm</i>      | 2.00914  | TCONS_00001386 | NM_012715         | chr1:182433102-182435280  | rn_0d | rn_7d | OK | 2.82626 | 11.3769 | -2.36566 | 0.017998    |
| <i>Nr4a1</i>    | 2.01127  | TCONS_00073662 | NM_024388         | chr7:140704520-140721072  | rn_0d | rn_7d | OK | 4.14203 | 16.6981 | -2.42506 | 0.0153058   |
| <i>Mdfic</i>    | 2.01198  | TCONS_00058005 | NM_001105668      | chr4:41790494-41870160    | rn_0d | rn_7d | OK | 2.60379 | 10.502  | -2.49526 | 0.0125865   |
| <i>Tnfrsf12</i> | 2.01244  | TCONS_00013340 | NM_181086         | chr10:12818948-12820975   | rn_0d | rn_7d | OK | 7.62256 | 30.7542 | -2.67937 | 0.00737616  |
| <i>Lmcd1</i>    | 2.01547  | TCONS_00058572 | NM_001008562      | chr4:207494639-207554220  | rn_0d | rn_7d | OK | 4.41153 | 17.8363 | -2.53875 | 0.0111248   |
| <i>Aldh1a2</i>  | 2.01687  | TCONS_00079645 | NM_053896         | chr8:75363282-75442964    | rn_0d | rn_7d | OK | 5.2935  | 21.423  | -2.59247 | 0.00952892  |
| <i>Creg1</i>    | 2.01904  | TCONS_00024164 | NM_001105966      | chr13:88849715-88864665   | rn_0d | rn_7d | OK | 10.6366 | 43.1119 | -2.96153 | 0.00306115  |
| <i>Hsd11b2</i>  | 2.02287  | TCONS_00040281 | NM_017081         | chr19:48341840-48347084   | rn_0d | rn_7d | OK | 0.26075 | 1.05967 | -1.98282 | 0.0473871   |
| <i>Adam15</i>   | 2.02641  | TCONS_00044386 | NM_020308         | chr2:208071873-208082526  | rn_0d | rn_7d | OK | 8.527   | 34.738  | -2.45841 | 0.0139555   |
| <i>1-Mar</i>    | 2.04289  | TCONS_00024876 | NM_001100811      | chr13:107375719-107398500 | rn_0d | rn_7d | OK | 0.45609 | 1.87942 | -2.03448 | 0.0419033   |
| <i>Anxa2</i>    | 2.04793  | TCONS_00078619 | NM_019905         | chr8:80014389-80050845    | rn_0d | rn_7d | OK | 53.0304 | 219.287 | -3.50264 | 0.000460677 |
| <i>Mmp11</i>    | 2.04886  | TCONS_00049058 | NM_012980         | chr20:15825613-15834397   | rn_0d | rn_7d | OK | 0.52873 | 2.18778 | -2.20046 | 0.0277746   |
| <i>Nek6</i>     | 2.06078  | TCONS_00051397 | NM_182953         | chr3:28037220-28114175    | rn_0d | rn_7d | OK | 12.6705 | 52.8626 | -3.11874 | 0.00181627  |
| <i>I113ral</i>  | 2.06201  | TCONS_00087462 | NM_145789         | chrX:122873687-122933122  | rn_0d | rn_7d | OK | 2.96069 | 12.3629 | -2.38047 | 0.0172904   |
| <i>C1s</i>      | 2.06471  | TCONS_00059665 | NM_138900         | chr4:224162092-224174100  | rn_0d | rn_7d | OK | 8.64362 | 36.1606 | -3.02826 | 0.00245968  |
| <i>Dok1</i>     | 2.0663   | TCONS_00059354 | NM_001025416      | chr4:178549314-178551776  | rn_0d | rn_7d | OK | 1.17814 | 4.9342  | -2.3648  | 0.0180399   |
| <i>Gas7</i>     | 2.07337  | TCONS_00012326 | NM_053484         | chr10:53760359-53988136   | rn_0d | rn_7d | OK | 8.69449 | 36.5925 | -2.7471  | 0.00601247  |
| <i>Gpx7</i>     | 2.07384  | TCONS_00064673 | NM_001106673      | chr5:131847355-131855200  | rn_0d | rn_7d | OK | 4.92774 | 20.7461 | -2.68623 | 0.00722627  |
| <i>Coro1a</i>   | 2.07602  | TCONS_00003899 | NM_130411         | chr1:205102881-205107856  | rn_0d | rn_7d | OK | 15.763  | 66.4634 | -3.24432 | 0.00117732  |
| <i>Mthfs</i>    | 2.07911  | TCONS_00078691 | NM_001009349      | chr8:96071790-96121397    | rn_0d | rn_7d | OK | 2.73307 | 11.5485 | -2.23344 | 0.0255198   |
| <i>Zfp3612</i>  | 2.0822   | TCONS_00073724 | NM_001036626      | chr7:2327990-2332024      | rn_0d | rn_7d | OK | 5.34334 | 22.6265 | -3.05762 | 0.00223105  |
| <i>Plcg2</i>    | 2.08258  | TCONS_00040407 | NM_017168         | chr19:60828450-60962641   | rn_0d | rn_7d | OK | 0.51756 | 2.19219 | -2.0022  | 0.0452632   |
| <i>Fb1n1</i>    | 2.0846   | TCONS_00073545 | NM_001127547      | chr7:125810695-125890371  | rn_0d | rn_7d | OK | 8.24421 | 34.9683 | -2.46434 | 0.0137265   |
| <i>Asgr1</i>    | 2.08901  | TCONS_00012401 | NM_012503         | chr10:56407177-56411205   | rn_0d | rn_7d | OK | 2.34446 | 9.97465 | -2.23051 | 0.0257136   |
| <i>Zfp3612</i>  | 2.08985  | TCONS_00069652 | NM_001036626      | chr6:7357980-7362018      | rn_0d | rn_7d | OK | 5.02964 | 21.4113 | -3.04717 | 0.00231008  |
| <i>Vnn1</i>     | 2.10091  | TCONS_00002415 | NM_001025623      | chr1:24089365-24099673    | rn_0d | rn_7d | OK | 0.71241 | 3.05608 | -2.45062 | 0.0142612   |
| <i>Cp</i>       | 2.10725  | TCONS_00042941 | NM_001270961      | chr2:124467561-124551506  | rn_0d | rn_7d | OK | 11.3256 | 48.7986 | -2.64834 | 0.00808878  |
| <i>Fzd1</i>     | 2.108    | TCONS_00057951 | NM_021266         | chr4:26377856-26382255    | rn_0d | rn_7d | OK | 2.06815 | 8.91564 | -2.87891 | 0.00399051  |
| <i>Pi16</i>     | 2.11045  | TCONS_00048954 | NM_001170481      | chr20:9162864-9173002     | rn_0d | rn_7d | OK | 2.53999 | 10.9683 | -2.16381 | 0.0304788   |
| <i>Aqp1</i>     | 2.11998  | TCONS_00058289 | NM_012778         | chr4:150203460-150215641  | rn_0d | rn_7d | OK | 0.71678 | 3.11575 | -2.52725 | 0.011496    |
| <i>Cidea</i>    | 2.12277  | TCONS_00038053 | NM_001170467      | chr18:62268024-62292644   | rn_0d | rn_7d | OK | 2.49061 | 10.8474 | -2.25759 | 0.0239714   |
| <i>Apbblip</i>  | 2.12673  | TCONS_00035917 | NM_001100577      | chr17:91762063-91812346   | rn_0d | rn_7d | OK | 3.47119 | 15.1597 | -2.74421 | 0.0060656   |

|                 |         |                |                   |                           |       |       |    |         |         |          |             |
|-----------------|---------|----------------|-------------------|---------------------------|-------|-------|----|---------|---------|----------|-------------|
| <i>Serpinf1</i> | 2.12755 | TCONS_00013928 | NM_177927         | chr10:61954918-61969094   | rn_0d | rn_7d | OK | 12.1947 | 53.2879 | -3.23284 | 0.00122565  |
| <i>Smim3</i>    | 2.12782 | TCONS_00038375 | NM_173126         | chr18:54978250-55023659   | rn_0d | rn_7d | OK | 4.14604 | 18.1205 | -2.426   | 0.0152662   |
| <i>Gpx1</i>     | 2.12903 | TCONS_00078837 | NM_030826         | chr8:116466117-116467216  | rn_0d | rn_7d | OK | 73.2706 | 320.502 | -3.57002 | 0.000356957 |
| <i>Glb1</i>     | 2.13081 | TCONS_00078945 | NM_001108192      | chr8:121752181-121824793  | rn_0d | rn_7d | OK | 3.85961 | 16.9037 | -2.04397 | 0.0409566   |
| <i>Nupr1</i>    | 2.13154 | TCONS_00003859 | NM_053611         | chr1:201816732-201818768  | rn_0d | rn_7d | OK | 9.32835 | 40.8756 | -2.81086 | 0.00494094  |
| <i>Nupr1</i>    | 2.13154 | TCONS_00003893 | NM_053611_dup1    | chr1:205021876-205023912  | rn_0d | rn_7d | OK | 9.32835 | 40.8756 | -2.81086 | 0.00494094  |
| <i>Osr2</i>     | 2.13597 | TCONS_00073265 | NM_001012118      | chr7:74213950-74221076    | rn_0d | rn_7d | OK | 0.22706 | 0.99799 | -2.01843 | 0.0435467   |
| <i>Hba1</i>     | 2.14649 | TCONS_00013452 | NM_013096         | chr10:15497888-15498744   | rn_0d | rn_7d | OK | 187.844 | 831.676 | -3.66472 | 0.000247611 |
| <i>Ctss</i>     | 2.15879 | TCONS_00043366 | NM_017320         | chr2:217141242-217169059  | rn_0d | rn_7d | OK | 52.0604 | 232.47  | -2.01162 | 0.0442595   |
| <i>Tspan4</i>   | 2.15922 | TCONS_00001694 | NM_001013070_dup1 | chr1:220934412-220954064  | rn_0d | rn_7d | OK | 6.83671 | 30.5378 | -2.97557 | 0.00292448  |
| <i>Kifc1</i>    | 2.16316 | TCONS_00048909 | NM_001005878      | chr20:7567670-7585191     | rn_0d | rn_7d | OK | 0.78797 | 3.52929 | -2.19464 | 0.0281895   |
| <i>Ctsb</i>     | 2.16416 | TCONS_00030001 | NM_022597         | chr15:50081534-50102407   | rn_0d | rn_7d | OK | 186.868 | 837.552 | -3.0848  | 0.00203692  |
| <i>Foxd1</i>    | 2.16711 | TCONS_00042675 | NM_134337         | chr2:47560938-47563359    | rn_0d | rn_7d | OK | 1.1551  | 5.18784 | -2.56561 | 0.0102994   |
| <i>Pdlim1</i>   | 2.16929 | TCONS_00004532 | NM_017365         | chr1:266752409-266800887  | rn_0d | rn_7d | OK | 3.97152 | 17.864  | -2.58392 | 0.00976855  |
| <i>Qprt</i>     | 2.17084 | TCONS_00003923 | NM_001009646      | chr1:205534749-205550041  | rn_0d | rn_7d | OK | 2.58939 | 11.6596 | -2.70655 | 0.00679868  |
| <i>Tmem173</i>  | 2.1719  | TCONS_00038276 | NM_001109122      | chr18:28242118-28248371   | rn_0d | rn_7d | OK | 1.49189 | 6.72268 | -2.2933  | 0.0218305   |
| <i>Hic1</i>     | 2.17474 | TCONS_00013921 | NM_001107021      | chr10:61721539-61725164   | rn_0d | rn_7d | OK | 0.75873 | 3.4257  | -2.57653 | 0.00997968  |
| <i>Grk6</i>     | 2.17987 | TCONS_00035536 | NM_031657         | chr17:11814900-11830526   | rn_0d | rn_7d | OK | 3.55832 | 16.1232 | -2.22979 | 0.0257614   |
| <i>Limd2</i>    | 2.18312 | TCONS_00014394 | NM_001025715      | chr10:94099469-94101864   | rn_0d | rn_7d | OK | 11.1237 | 50.5164 | -2.59426 | 0.00947959  |
| <i>Pla2g15</i>  | 2.18683 | TCONS_00040308 | NM_001004277      | chr19:48996108-49013716   | rn_0d | rn_7d | OK | 2.93922 | 13.3824 | -2.32936 | 0.0198398   |
| <i>Cdca2</i>    | 2.18706 | TCONS_00029977 | NM_001107273      | chr15:47185947-47231365   | rn_0d | rn_7d | OK | 0.19304 | 0.87905 | -1.97022 | 0.0488133   |
| <i>Metrn1</i>   | 2.18904 | TCONS_00013238 | NM_001014104      | chr10:110473723-110487807 | rn_0d | rn_7d | OK | 4.86102 | 22.1663 | -2.48081 | 0.0131086   |
| <i>Olfml3</i>   | 2.1917  | TCONS_00044525 | NM_001107708      | chr2:225643128-225645958  | rn_0d | rn_7d | OK | 7.46789 | 34.1166 | -3.20794 | 0.00133689  |
| <i>Ptprcap</i>  | 2.19433 | TCONS_00001793 | NM_001024289      | chr1:226274620-226276780  | rn_0d | rn_7d | OK | 0.5825  | 2.66596 | -2.16298 | 0.0305428   |
| <i>Igfbp3</i>   | 2.19765 | TCONS_00027539 | NM_012588         | chr14:81091986-81099675   | rn_0d | rn_7d | OK | 25.5481 | 117.197 | -3.33579 | 0.000850581 |
| <i>Rin1</i>     | 2.19882 | TCONS_00001812 | NM_139038         | chr1:227266339-227270986  | rn_0d | rn_7d | OK | 0.16136 | 0.74081 | -2.16632 | 0.030287    |
| <i>Scarb1</i>   | 2.2102  | TCONS_00021343 | NM_031541         | chr12:38553338-38638465   | rn_0d | rn_7d | OK | 10.2349 | 47.3609 | -2.76941 | 0.00561574  |
| <i>Pdpn</i>     | 2.21084 | TCONS_00065096 | NM_019358         | chr5:165646113-165679595  | rn_0d | rn_7d | OK | 21.0484 | 97.4425 | -3.63709 | 0.000275733 |
| <i>RGD15651</i> | 2.21476 | TCONS_00011863 | NM_001105762      | chr10:9325200-9334297     | rn_0d | rn_7d | OK | 0.65413 | 3.0365  | -2.4692  | 0.0135416   |
| <i>Cpxm1</i>    | 2.21482 | TCONS_00053436 | NM_001106511      | chr3:129414246-129421045  | rn_0d | rn_7d | OK | 2.30451 | 10.6981 | -2.94094 | 0.0032722   |
| <i>Gmip</i>     | 2.21539 | TCONS_00033074 | NM_001107308      | chr16:21263640-21277131   | rn_0d | rn_7d | OK | 1.01518 | 4.71453 | -2.12914 | 0.0332427   |
| <i>Shc1</i>     | 2.2165  | TCONS_00043262 | NM_053517         | chr2:208159785-208171348  | rn_0d | rn_7d | OK | 4.64117 | 21.5704 | -2.35634 | 0.0184559   |
| <i>Lgmn</i>     | 2.21672 | TCONS_00070142 | NM_022226         | chr6:135492942-135531839  | rn_0d | rn_7d | OK | 45.8038 | 212.912 | -2.73255 | 0.0062847   |
| <i>Gpx3</i>     | 2.21985 | TCONS_00012185 | NM_022525         | chr10:40019703-40027691   | rn_0d | rn_7d | OK | 17.5964 | 81.9716 | -3.51254 | 0.000443842 |
| <i>Rbm3</i>     | 2.22091 | TCONS_00087030 | NM_053696         | chrX:15882033-15888838    | rn_0d | rn_7d | OK | 20.8803 | 97.3416 | -2.51606 | 0.0118674   |
| <i>Abrac1</i>   | 2.22302 | TCONS_00002371 | NM_001099647      | chr1:14859229-14869661    | rn_0d | rn_7d | OK | 12.5443 | 58.5658 | -2.61519 | 0.0089177   |
| <i>RGD13115</i> | 2.2311  | TCONS_00004681 | NM_001079705      | chr1:287492665-287596785  | rn_0d | rn_7d | OK | 2.71109 | 12.7284 | -2.16345 | 0.0305063   |
| <i>Tspan4</i>   | 2.23168 | TCONS_00001715 | NM_001013070      | chr1:221371201-221390853  | rn_0d | rn_7d | OK | 7.3051  | 34.3107 | -3.10655 | 0.00189283  |
| <i>RT1-Bb</i>   | 2.2318  | TCONS_00048837 | NM_001004084      | chr20:6123271-6128913     | rn_0d | rn_7d | OK | 1.72765 | 8.11511 | -2.72867 | 0.00635911  |
| <i>Cxc112</i>   | 2.23251 | TCONS_00058645 | NM_022177         | chr4:215195688-215208536  | rn_0d | rn_7d | OK | 10.783  | 50.6746 | -2.23674 | 0.0253032   |
| <i>Gadd45g</i>  | 2.24272 | TCONS_00035571 | NM_001077640      | chr17:15469296-15471042   | rn_0d | rn_7d | OK | 12.4602 | 58.9728 | -3.21152 | 0.00132033  |
| <i>Fkbp10</i>   | 2.24317 | TCONS_00012881 | NM_001014120      | chr10:88119583-88131445   | rn_0d | rn_7d | OK | 5.35381 | 25.3469 | -3.30136 | 0.00096216  |
| <i>Copz2</i>    | 2.24832 | TCONS_00012803 | NM_001108294      | chr10:84511736-84524393   | rn_0d | rn_7d | OK | 4.62634 | 21.9811 | -2.78691 | 0.00532136  |
| <i>Snai1</i>    | 2.25381 | TCONS_00052404 | NM_053805         | chr3:170425897-170430384  | rn_0d | rn_7d | OK | 1.17555 | 5.60665 | -2.64072 | 0.00827312  |
| <i>Plxnb2</i>   | 2.25474 | TCONS_00074659 | NM_001108106      | chr7:129821098-129848156  | rn_0d | rn_7d | OK | 4.93896 | 23.571  | -2.56706 | 0.0102564   |

|                 |          |                |                   |                          |       |       |    |          |          |           |              |
|-----------------|----------|----------------|-------------------|--------------------------|-------|-------|----|----------|----------|-----------|--------------|
| <i>Crabp2</i>   | 2. 25684 | TCONS_00043209 | NM_017244         | chr2:206725432-206729779 | rn_0d | rn_7d | OK | 6. 1924  | 29. 5961 | -2. 63934 | 0. 00830666  |
| <i>Mical1</i>   | 2. 26003 | TCONS_00049219 | NM_001106397      | chr20:47892300-47904250  | rn_0d | rn_7d | OK | 2. 26179 | 10. 834  | -2. 82259 | 0. 00476368  |
| <i>Cox6b2</i>   | 2. 26207 | TCONS_00002727 | NM_001039085      | chr1:75873034-75890658   | rn_0d | rn_7d | OK | 1. 56142 | 7. 48982 | -2. 03694 | 0. 0416557   |
| <i>Pcolce</i>   | 2. 26566 | TCONS_00021242 | NM_019237         | chr12:24159835-24186600  | rn_0d | rn_7d | OK | 13. 853  | 66. 6155 | -2. 9932  | 0. 00276066  |
| <i>Rin1</i>     | 2. 26633 | TCONS_00001818 | NM_139038_dup1    | chr1:227359503-227364150 | rn_0d | rn_7d | OK | 0. 16136 | 0. 77629 | -2. 23721 | 0. 0252724   |
| <i>Col15a1</i>  | 2. 27279 | TCONS_00063355 | NM_001100535      | chr5:67359918-67469799   | rn_0d | rn_7d | OK | 6. 13424 | 29. 6442 | -3. 25199 | 0. 00114599  |
| <i>Rcn3</i>     | 2. 27376 | TCONS_00003150 | NM_001008694      | chr1:102141918-102151178 | rn_0d | rn_7d | OK | 9. 5274  | 46. 0726 | -3. 29611 | 0. 000980321 |
| <i>Slpr3</i>    | 2. 27412 | TCONS_00035575 | NM_001271143      | chr17:15871250-15884616  | rn_0d | rn_7d | OK | 3. 78593 | 18. 3127 | -3. 04805 | 0. 00230333  |
| <i>Ifngr1</i>   | 2. 27609 | TCONS_00000044 | NM_053783         | chr1:16607412-16628023   | rn_0d | rn_7d | OK | 15. 9215 | 77. 1181 | -2. 58377 | 0. 00977269  |
| <i>Hexb</i>     | 2. 27757 | TCONS_00043830 | NM_001011946      | chr2:46895517-47171950   | rn_0d | rn_7d | OK | 42. 9957 | 208. 47  | -2. 15333 | 0. 0312925   |
| <i>Scamp2</i>   | 2. 27891 | TCONS_00078476 | NM_023955         | chr8:62119184-62145787   | rn_0d | rn_7d | OK | 12. 5178 | 60. 7502 | -3. 53995 | 0. 000400205 |
| <i>Ctgf</i>     | 2. 28834 | TCONS_00002399 | NM_022266         | chr1:23331544-23334660   | rn_0d | rn_7d | OK | 15. 3356 | 74. 9135 | -3. 69481 | 0. 00022005  |
| <i>Lum</i>      | 2. 2924  | TCONS_00073112 | NM_031050         | chr7:38860986-38868211   | rn_0d | rn_7d | OK | 18. 4265 | 90. 2655 | -3. 33417 | 0. 000855539 |
| <i>Slc24a6</i>  | 2. 29307 | TCONS_00021976 | NM_001017488      | chr12:43421502-43444143  | rn_0d | rn_7d | OK | 2. 75583 | 13. 5063 | -2. 31708 | 0. 0204996   |
| <i>Gjb2</i>     | 2. 29489 | TCONS_00030414 | NM_001004099      | chr15:41224497-41241719  | rn_0d | rn_7d | OK | 4. 47242 | 21. 9469 | -2. 84211 | 0. 00448165  |
| <i>Liph</i>     | 2. 2956  | TCONS_00018893 | NM_001044279      | chr11:85770269-85815457  | rn_0d | rn_7d | OK | 0. 0949  | 0. 46591 | -2. 05893 | 0. 039501    |
| <i>Cd63</i>     | 2. 29764 | TCONS_00072818 | NM_017125         | chr7:3303448-3305798     | rn_0d | rn_7d | OK | 132. 001 | 648. 986 | -3. 91496 | 9. 04E-05    |
| <i>Efcab4a</i>  | 2. 30009 | TCONS_00001692 | NM_001127541      | chr1:220920825-220926197 | rn_0d | rn_7d | OK | 0. 89457 | 4. 40563 | -2. 68896 | 0. 00716748  |
| <i>Sat1</i>     | 2. 30088 | TCONS_00087183 | NM_001007667      | chrX:43930759-43934047   | rn_0d | rn_7d | OK | 43. 5863 | 214. 775 | -2. 72849 | 0. 00636252  |
| <i>MGC10556</i> | 2. 30355 | TCONS_00037995 | NM_001024284      | chr18:54920889-54939120  | rn_0d | rn_7d | OK | 0. 5769  | 2. 848   | -2. 65999 | 0. 00781428  |
| <i>Hpse</i>     | 2. 30772 | TCONS_00026722 | NM_022605         | chr14:10483071-10523921  | rn_0d | rn_7d | OK | 1. 84786 | 9. 14874 | -2. 69504 | 0. 00703793  |
| <i>Ck1f</i>     | 2. 31731 | TCONS_00040527 | NM_139111         | chr19:907065-915792      | rn_0d | rn_7d | OK | 2. 45067 | 12. 2142 | -2. 39323 | 0. 0167007   |
| <i>Mcm6</i>     | 2. 3231  | TCONS_00024455 | NM_017287         | chr13:50127491-50152683  | rn_0d | rn_7d | OK | 2. 35055 | 11. 7623 | -3. 20301 | 0. 00135999  |
| <i>Alox15</i>   | 2. 32389 | TCONS_00013848 | NM_031010         | chr10:56704493-56713192  | rn_0d | rn_7d | OK | 0. 3924  | 1. 96466 | -2. 42344 | 0. 0153744   |
| <i>Rgs10</i>    | 2. 3279  | TCONS_00003962 | NM_019337         | chr1:206829263-206870605 | rn_0d | rn_7d | OK | 22. 6839 | 113. 89  | -3. 26004 | 0. 00111398  |
| <i>Thbd</i>     | 2. 32872 | TCONS_00053510 | NM_031771         | chr3:149159894-149163547 | rn_0d | rn_7d | OK | 4. 77053 | 23. 9652 | -3. 49398 | 0. 000475872 |
| <i>Dpp7</i>     | 2. 33528 | TCONS_00052554 | NM_031973         | chr3:2550547-2554800     | rn_0d | rn_7d | OK | 37. 5507 | 189. 499 | -3. 94223 | 8. 07E-05    |
| <i>Aldh3b1</i>  | 2. 33743 | TCONS_00004162 | NM_001006998      | chr1:226018061-226038888 | rn_0d | rn_7d | OK | 1. 66876 | 8. 43392 | -2. 79623 | 0. 00517031  |
| <i>Gbp5</i>     | 2. 34141 | TCONS_00043672 | NM_001108569      | chr2:266707527-266725952 | rn_0d | rn_7d | OK | 1. 39108 | 7. 04997 | -3. 07029 | 0. 0021385   |
| <i>Oas1</i>     | 2. 34454 | TCONS_00022029 | NM_001009681      | chr12:49237541-49250054  | rn_0d | rn_7d | OK | 1. 02367 | 5. 19924 | -2. 80916 | 0. 00496702  |
| <i>Foxc1</i>    | 2. 34549 | TCONS_00035672 | NM_134338         | chr17:35833709-35837690  | rn_0d | rn_7d | OK | 2. 22895 | 11. 3283 | -3. 19597 | 0. 00139362  |
| <i>Arhgap15</i> | 2. 35414 | TCONS_00051404 | NM_001013917      | chr3:33831451-34442272   | rn_0d | rn_7d | OK | 1. 47801 | 7. 55692 | -2. 92689 | 0. 0034237   |
| <i>Epcam</i>    | 2. 35446 | TCONS_00069668 | NM_138541         | chr6:21264115-21280099   | rn_0d | rn_7d | OK | 0. 28595 | 1. 46234 | -2. 2485  | 0. 0245441   |
| <i>Naaa</i>     | 2. 35455 | TCONS_00026768 | NM_001010967      | chr14:17199738-17218991  | rn_0d | rn_7d | OK | 7. 26286 | 37. 1448 | -3. 43973 | 0. 000582299 |
| <i>Efcab4a</i>  | 2. 35792 | TCONS_00001713 | NM_001127541_dup1 | chr1:221357614-221362986 | rn_0d | rn_7d | OK | 0. 89457 | 4. 58582 | -2. 75992 | 0. 00578148  |
| <i>Tnfrsf1a</i> | 2. 35864 | TCONS_00058764 | NM_013091         | chr4:224881444-224894088 | rn_0d | rn_7d | OK | 9. 98853 | 51. 23   | -3. 61894 | 0. 000295812 |
| <i>Igfbp4</i>   | 2. 36451 | TCONS_00012874 | NM_001004274      | chr10:86746285-86759484  | rn_0d | rn_7d | OK | 3. 53285 | 18. 1934 | -3. 11435 | 0. 0018435   |
| <i>Prdm1</i>    | 2. 36553 | TCONS_00049714 | NM_001107639      | chr20:51096615-51118247  | rn_0d | rn_7d | OK | 0. 13011 | 0. 67052 | -2. 27995 | 0. 0226106   |
| <i>Ada</i>      | 2. 36723 | TCONS_00053682 | NM_130399         | chr3:166305963-166330108 | rn_0d | rn_7d | OK | 1. 52598 | 7. 87325 | -2. 42341 | 0. 0153757   |
| <i>Spp1</i>     | 2. 36977 | TCONS_00027248 | NM_012881         | chr14:6653085-6658937    | rn_0d | rn_7d | OK | 128. 97  | 666. 59  | -3. 69343 | 0. 000221251 |
| <i>Ehbp111</i>  | 2. 37678 | TCONS_00004234 | NM_001129997      | chr1:227997200-228017354 | rn_0d | rn_7d | OK | 1. 63931 | 8. 5142  | -2. 75721 | 0. 0058296   |
| <i>Ifitm3</i>   | 2. 37714 | TCONS_00004062 | NM_001136124      | chr1:220730714-220731913 | rn_0d | rn_7d | OK | 56. 3497 | 292. 74  | -3. 46374 | 0. 000532725 |
| <i>Hba2</i>     | 2. 38148 | TCONS_00013451 | NM_001007722      | chr10:15484458-15485302  | rn_0d | rn_7d | OK | 113. 919 | 593. 598 | -3. 95561 | 7. 63E-05    |
| <i>Tcf19</i>    | 2. 38461 | TCONS_00048824 | NM_213561         | chr20:5831136-5833706    | rn_0d | rn_7d | OK | 2. 38677 | 12. 4637 | -2. 85397 | 0. 00431763  |
| <i>Hmgb2</i>    | 2. 38811 | TCONS_00033124 | NM_017187         | chr16:35886763-35889338  | rn_0d | rn_7d | OK | 10. 0463 | 52. 5896 | -3. 48328 | 0. 000495315 |

|                 |         |                |                |                           |       |       |    |         |         |          |             |
|-----------------|---------|----------------|----------------|---------------------------|-------|-------|----|---------|---------|----------|-------------|
| <i>Chsy1</i>    | 2.3895  | TCONS_00000939 | NM_001106268   | chr1:128095352-128156150  | rn_0d | rn_7d | OK | 3.18678 | 16.698  | -2.65749 | 0.0078725   |
| <i>Ii2rb</i>    | 2.39289 | TCONS_00074512 | NM_013195      | chr7:119690403-119705275  | rn_0d | rn_7d | OK | 0.20146 | 1.05807 | -2.47097 | 0.0134748   |
| <i>Casp4</i>    | 2.39616 | TCONS_00078012 | NM_053736      | chr8:2658122-2674608      | rn_0d | rn_7d | OK | 3.2358  | 17.0333 | -2.14477 | 0.0319714   |
| <i>Col1a2</i>   | 2.39911 | TCONS_00057965 | NM_053356      | chr4:29443177-29478105    | rn_0d | rn_7d | OK | 21.6584 | 114.244 | -4.07572 | 4.59E-05    |
| <i>Col1a2</i>   | 2.39911 | TCONS_00057981 | NM_053356_dup1 | chr4:31405252-31440180    | rn_0d | rn_7d | OK | 21.6584 | 114.244 | -4.07572 | 4.59E-05    |
| <i>Bgn</i>      | 2.41215 | TCONS_00003461 | NM_017087      | chr1:153067989-153080152  | rn_0d | rn_7d | OK | 27.4964 | 146.354 | -4.09207 | 4.28E-05    |
| <i>Myd88</i>    | 2.41264 | TCONS_00079988 | NM_198130      | chr8:127229272-127233342  | rn_0d | rn_7d | OK | 3.14407 | 16.7405 | -3.28512 | 0.00101937  |
| <i>Ecm1</i>     | 2.41929 | TCONS_00044457 | NM_053882      | chr2:217345267-217350462  | rn_0d | rn_7d | OK | 3.69414 | 19.7602 | -3.00431 | 0.00266182  |
| <i>Htra3</i>    | 2.42007 | TCONS_00026988 | NM_001271027   | chr14:79875404-79903558   | rn_0d | rn_7d | OK | 5.94032 | 31.7924 | -2.93604 | 0.00332428  |
| <i>Ii4r</i>     | 2.42272 | TCONS_00001499 | NM_133380      | chr1:203927940-203952929  | rn_0d | rn_7d | OK | 2.24411 | 12.0325 | -2.5857  | 0.00971809  |
| <i>Cd276</i>    | 2.42332 | TCONS_00079545 | NM_182824      | chr8:63090337-63120814    | rn_0d | rn_7d | OK | 3.95005 | 21.1882 | -2.99417 | 0.00275189  |
| <i>Trim63</i>   | 2.42801 | TCONS_00063882 | NM_080903      | chr5:156292553-156306092  | rn_0d | rn_7d | OK | 0.28576 | 1.53781 | -2.38295 | 0.0171744   |
| <i>Akna</i>     | 2.43082 | TCONS_00064529 | NM_001108668   | chr5:83298321-83344501    | rn_0d | rn_7d | OK | 0.74107 | 3.99583 | -2.15146 | 0.0314402   |
| <i>RGD15611</i> | 2.43372 | TCONS_00032486 | NM_001134605   | chr16:10987768-11019053   | rn_0d | rn_7d | OK | 0.57728 | 3.11898 | -2.25304 | 0.0242566   |
| <i>Slc16a11</i> | 2.44504 | TCONS_00012408 | NM_001105797   | chr10:56566708-56571626   | rn_0d | rn_7d | OK | 4.51252 | 24.5725 | -2.19368 | 0.0282587   |
| <i>Dap</i>      | 2.4711  | TCONS_00042878 | NM_022526      | chr2:103949820-104003059  | rn_0d | rn_7d | OK | 13.1332 | 72.8194 | -3.81995 | 0.000133481 |
| <i>Plac8</i>    | 2.47817 | TCONS_00026725 | NM_001108353   | chr14:10640285-10661811   | rn_0d | rn_7d | OK | 6.77208 | 37.7334 | -3.22508 | 0.00125936  |
| <i>Gm2a</i>     | 2.48149 | TCONS_00012186 | NM_172335      | chr10:40277004-40289541   | rn_0d | rn_7d | OK | 41.8162 | 233.533 | -4.21205 | 2.53E-05    |
| <i>Man2b1</i>   | 2.4986  | TCONS_00040225 | NM_199404      | chr19:37172459-37191891   | rn_0d | rn_7d | OK | 11.5264 | 65.1398 | -3.58787 | 0.000333393 |
| <i>Ctsd</i>     | 2.50004 | TCONS_00004106 | NM_134334      | chr1:222436921-222448798  | rn_0d | rn_7d | OK | 183.114 | 1035.88 | -3.78091 | 0.000156259 |
| <i>Efnb1</i>    | 2.50051 | TCONS_00087250 | NM_017089      | chrX:69764313-69777121    | rn_0d | rn_7d | OK | 2.35016 | 13.2992 | -3.44671 | 0.000567452 |
| <i>Tifa</i>     | 2.50157 | TCONS_00043608 | NM_001014044   | chr2:251472400-251482345  | rn_0d | rn_7d | OK | 4.64325 | 26.2948 | -3.11283 | 0.00185306  |
| <i>Cdca8</i>    | 2.50802 | TCONS_00064833 | NM_001025050   | chr5:146680980-146700067  | rn_0d | rn_7d | OK | 1.43073 | 8.13856 | -3.00398 | 0.00266475  |
| <i>Inpp5d</i>   | 2.53054 | TCONS_00083834 | NM_019311      | chr9:94464378-94569988    | rn_0d | rn_7d | OK | 2.6672  | 15.4107 | -3.51481 | 0.000440065 |
| <i>Sp110</i>    | 2.53196 | TCONS_00085464 | NM_001034137   | chr9:92324920-92396016    | rn_0d | rn_7d | OK | 3.23106 | 18.6871 | -2.2401  | 0.0250843   |
| <i>Aspm</i>     | 2.5428  | TCONS_00024036 | NM_001105955   | chr13:61564058-61609831   | rn_0d | rn_7d | OK | 0.18927 | 1.10292 | -2.12862 | 0.0332856   |
| <i>Myc</i>      | 2.54791 | TCONS_00073330 | NM_012603      | chr7:103157451-103162378  | rn_0d | rn_7d | OK | 0.82249 | 4.8098  | -2.41678 | 0.0156586   |
| <i>Cfp</i>      | 2.55605 | TCONS_00086975 | NM_001106757   | chrX:2125792-2131704      | rn_0d | rn_7d | OK | 3.6469  | 21.4473 | -2.48099 | 0.0131018   |
| <i>Twist2</i>   | 2.56489 | TCONS_00083893 | NM_021691      | chr9:98599200-98642827    | rn_0d | rn_7d | OK | 0.38481 | 2.27696 | -2.50632 | 0.0121997   |
| <i>Dapp1</i>    | 2.56523 | TCONS_00044704 | NM_001108568   | chr2:261723410-261772455  | rn_0d | rn_7d | OK | 1.49558 | 8.85158 | -3.35103 | 0.000805114 |
| <i>Hexa</i>     | 2.5678  | TCONS_00078499 | NM_001004443   | chr8:64087246-64112576    | rn_0d | rn_7d | OK | 27.5216 | 163.177 | -4.27126 | 1.94E-05    |
| <i>Tes</i>      | 2.57141 | TCONS_00058010 | NM_001039344   | chr4:44929701-44968306    | rn_0d | rn_7d | OK | 3.16111 | 18.7894 | -3.20727 | 0.00134003  |
| <i>Fxyd5</i>    | 2.57528 | TCONS_00003034 | NM_001270688   | chr1:90620337-90629951    | rn_0d | rn_7d | OK | 12.1148 | 72.2023 | -2.92763 | 0.00341558  |
| <i>Fhod1</i>    | 2.57773 | TCONS_00040729 | NM_001191600   | chr19:48150420-48169238   | rn_0d | rn_7d | OK | 0.88874 | 5.30576 | -2.27367 | 0.0229856   |
| <i>Irgm</i>     | 2.57893 | TCONS_00013535 | NM_001012007   | chr10:33997564-34005630   | rn_0d | rn_7d | OK | 1.24089 | 7.41423 | -2.23067 | 0.0257028   |
| <i>Gimap4</i>   | 2.58791 | TCONS_00058240 | NM_173153      | chr4:143008387-143015295  | rn_0d | rn_7d | OK | 0.16378 | 0.98466 | -2.41185 | 0.0158718   |
| <i>Tagln2</i>   | 2.59168 | TCONS_00024236 | NM_001013127   | chr13:95407076-95413997   | rn_0d | rn_7d | OK | 35.4975 | 213.979 | -4.2929  | 1.76E-05    |
| <i>Sbno2</i>    | 2.59527 | TCONS_00072934 | NM_001108068   | chr7:12641918-12685802    | rn_0d | rn_7d | OK | 2.45499 | 14.8356 | -3.16236 | 0.00156495  |
| <i>S100a4</i>   | 2.60088 | TCONS_00043304 | NM_012618      | chr2:209431372-209433679  | rn_0d | rn_7d | OK | 69.0026 | 418.609 | -4.1582  | 3.21E-05    |
| <i>Rarres1</i>  | 2.60797 | TCONS_00044238 | NM_001014790   | chr2:184000124-184036282  | rn_0d | rn_7d | OK | 9.03457 | 55.0789 | -3.25725 | 0.00112496  |
| <i>St6galna</i> | 2.61058 | TCONS_00014521 | NM_001031652   | chr10:105313455-105331475 | rn_0d | rn_7d | OK | 0.71568 | 4.37101 | -2.23244 | 0.0255856   |
| <i>Ngfr</i>     | 2.61862 | TCONS_00014167 | NM_012610      | chr10:83198410-83216635   | rn_0d | rn_7d | OK | 2.21249 | 13.5883 | -3.58568 | 0.000336201 |
| <i>Nme4</i>     | 2.61943 | TCONS_00013443 | NM_001109478   | chr10:15275266-15279122   | rn_0d | rn_7d | OK | 1.07379 | 6.59853 | -2.69729 | 0.00699055  |
| <i>Rsad2</i>    | 2.6263  | TCONS_00069811 | NM_138881      | chr6:54375723-54388917    | rn_0d | rn_7d | OK | 2.4783  | 15.302  | -3.54498 | 0.00039265  |
| <i>Cc15</i>     | 2.63341 | TCONS_00014039 | NM_031116      | chr10:70373353-70377892   | rn_0d | rn_7d | OK | 0.78385 | 4.86372 | -2.52064 | 0.0117142   |

|                 |          |                |                |                           |       |       |    |          |          |           |              |
|-----------------|----------|----------------|----------------|---------------------------|-------|-------|----|----------|----------|-----------|--------------|
| <i>Stk10</i>    | 2. 6416  | TCONS_00012015 | NM_019206      | chr10:17316574-17409682   | rn_0d | rn_7d | OK | 2. 99344 | 18. 6798 | -4. 03499 | 5. 46E-05    |
| <i>Tap1</i>     | 2. 6417  | TCONS_00048833 | NM_032055      | chr20:6058570-6069222     | rn_0d | rn_7d | OK | 2. 39369 | 14. 9382 | -3. 13724 | 0. 00170544  |
| <i>Tm4sf1</i>   | 2. 6481  | TCONS_00044181 | NM_001106434   | chr2:166792564-166965410  | rn_0d | rn_7d | OK | 1. 80041 | 11. 2857 | -1. 97657 | 0. 0480904   |
| <i>Nek2</i>     | 2. 64849 | TCONS_00024374 | NM_053691      | chr13:115071741-115084946 | rn_0d | rn_7d | OK | 0. 42882 | 2. 68877 | -2. 92199 | 0. 003478    |
| <i>RT1-DMa</i>  | 2. 65009 | TCONS_00049407 | NM_198741_dup1 | chr20:7302035-7305439     | rn_0d | rn_7d | OK | 7. 12448 | 44. 7209 | -3. 6365  | 0. 000276372 |
| <i>SI00a9</i>   | 2. 65101 | TCONS_00044416 | NM_053587      | chr2:209531411-209534093  | rn_0d | rn_7d | OK | 1. 20391 | 7. 56184 | -2. 71535 | 0. 0066206   |
| <i>Plck</i>     | 2. 65102 | TCONS_00027130 | NM_001025750   | chr14:100353684-100386531 | rn_0d | rn_7d | OK | 3. 32964 | 20. 9139 | -3. 20902 | 0. 0013319   |
| <i>RT1-DMa</i>  | 2. 65328 | TCONS_00048831 | NM_198741      | chr20:6015059-6018463     | rn_0d | rn_7d | OK | 7. 12448 | 44. 8199 | -3. 64134 | 0. 000271218 |
| <i>C1r</i>      | 2. 65888 | TCONS_00058726 | NM_001134555   | chr4:224144486-224155321  | rn_0d | rn_7d | OK | 7. 35196 | 46. 4308 | -3. 48752 | 0. 000487529 |
| <i>Mst1</i>     | 2. 66748 | TCONS_00078831 | NM_024352      | chr8:116211796-116216367  | rn_0d | rn_7d | OK | 0. 07351 | 0. 46704 | -2. 22418 | 0. 0261366   |
| <i>Plp2</i>     | 2. 68307 | TCONS_00087052 | NM_207601      | chrX:16470479-16484448    | rn_0d | rn_7d | OK | 5. 76965 | 37. 0538 | -2. 96819 | 0. 00299557  |
| <i>LOC68906</i> | 2. 69803 | TCONS_00003640 | NM_001111269   | chr1:175098754-175100120  | rn_0d | rn_7d | OK | 20. 697  | 134. 306 | -3. 86724 | 0. 000110072 |
| <i>Zc3h12a</i>  | 2. 69847 | TCONS_00064835 | NM_001077671   | chr5:146878970-146887819  | rn_0d | rn_7d | OK | 0. 55643 | 3. 61185 | -2. 16156 | 0. 0306522   |
| <i>Edn1</i>     | 2. 70063 | TCONS_00035622 | NM_012548      | chr17:24118008-24124009   | rn_0d | rn_7d | OK | 0. 97899 | 6. 36432 | -3. 14452 | 0. 00166359  |
| <i>Calhm2</i>   | 2. 704   | TCONS_00004628 | NM_001008306   | chr1:274338777-274344504  | rn_0d | rn_7d | OK | 0. 97543 | 6. 35595 | -2. 99879 | 0. 00271053  |
| <i>Scpep1</i>   | 2. 70539 | TCONS_00012705 | NM_133383      | chr10:73846393-73880406   | rn_0d | rn_7d | OK | 16. 447  | 107. 273 | -4. 06098 | 4. 89E-05    |
| <i>Mt2A</i>     | 2. 7111  | TCONS_00040585 | NM_001137564   | chr19:11283092-11283867   | rn_0d | rn_7d | OK | 104. 506 | 684. 327 | -4. 23033 | 2. 33E-05    |
| <i>Kif11</i>    | 2. 71805 | TCONS_00002125 | NM_001169112   | chr1:263519575-263570293  | rn_0d | rn_7d | OK | 0. 62809 | 4. 13274 | -3. 49588 | 0. 000472506 |
| <i>Flnc</i>     | 2. 72288 | TCONS_00058054 | NM_001191862   | chr4:56478246-56505940    | rn_0d | rn_7d | OK | 3. 21241 | 21. 208  | -3. 66122 | 0. 000251018 |
| <i>Ninj1</i>    | 2. 7252  | TCONS_00035597 | NM_012867      | chr17:17930058-17945126   | rn_0d | rn_7d | OK | 14. 8881 | 98. 4484 | -4. 07139 | 4. 67E-05    |
| <i>Slc22a2</i>  | 2. 72832 | TCONS_00000225 | NM_031584      | chr1:51393922-51435246    | rn_0d | rn_7d | OK | 0. 51884 | 3. 43829 | -2. 88464 | 0. 00391856  |
| <i>Thbs4</i>    | 2. 72866 | TCONS_00043800 | NM_017133      | chr2:41549114-41591101    | rn_0d | rn_7d | OK | 1. 71018 | 11. 3358 | -3. 74879 | 0. 000177688 |
| <i>Fam198b</i>  | 2. 73157 | TCONS_00043156 | NM_199105      | chr2:198087636-198160605  | rn_0d | rn_7d | OK | 3. 05802 | 20. 3106 | -2. 96891 | 0. 00298854  |
| <i>Abp1</i>     | 2. 74495 | TCONS_00058247 | NM_022935      | chr4:143183685-143203221  | rn_0d | rn_7d | OK | 0. 06843 | 0. 45874 | -2. 40722 | 0. 0160747   |
| <i>Mmp2</i>     | 2. 74852 | TCONS_00040599 | NM_031054      | chr19:26629727-26658966   | rn_0d | rn_7d | OK | 8. 47718 | 56. 9689 | -4. 36381 | 1. 28E-05    |
| <i>Cfh</i>      | 2. 75039 | TCONS_00024563 | NM_130409      | chr13:61997443-62095011   | rn_0d | rn_7d | OK | 11. 6776 | 78. 5786 | -4. 12873 | 3. 65E-05    |
| <i>Psmb9</i>    | 2. 7595  | TCONS_00049353 | NM_012708      | chr20:6052971-6058393     | rn_0d | rn_7d | OK | 4. 28793 | 29. 0363 | -3. 53575 | 0. 000406624 |
| <i>F2r11</i>    | 2. 76161 | TCONS_00043817 | NM_053897      | chr2:44378261-44391213    | rn_0d | rn_7d | OK | 0. 45744 | 3. 10213 | -3. 16395 | 0. 00155644  |
| <i>Co16a2</i>   | 2. 76235 | TCONS_00049049 | NM_001100741   | chr20:14931525-14959214   | rn_0d | rn_7d | OK | 13. 6711 | 92. 7583 | -4. 63421 | 3. 58E-06    |
| <i>Emp3</i>     | 2. 76365 | TCONS_00003201 | NM_030847      | chr1:102979690-102982874  | rn_0d | rn_7d | OK | 11. 751  | 79. 8022 | -3. 46685 | 0. 000526594 |
| <i>B3gal1t4</i> | 2. 7666  | TCONS_00048906 | NM_133553      | chr20:7504520-7506372     | rn_0d | rn_7d | OK | 0. 52388 | 3. 56504 | -2. 15071 | 0. 031499    |
| <i>Gbp2</i>     | 2. 76742 | TCONS_00043682 | NM_133624      | chr2:266805233-266821133  | rn_0d | rn_7d | OK | 5. 43773 | 37. 0249 | -4. 17254 | 3. 01E-05    |
| <i>Bmp7</i>     | 2. 77414 | TCONS_00053769 | NM_001191856   | chr3:176945361-177020745  | rn_0d | rn_7d | OK | 1. 11595 | 7. 63387 | -2. 71475 | 0. 00663259  |
| <i>Kazald1</i>  | 2. 78362 | TCONS_00002203 | NM_001033064   | chr1:272267847-272273541  | rn_0d | rn_7d | OK | 0. 84639 | 5. 82806 | -2. 08959 | 0. 0366544   |
| <i>RT1-A2</i>   | 2. 79716 | TCONS_00048901 | NM_001008829   | chr20:7395432-7500406     | rn_0d | rn_7d | OK | 34. 8125 | 241. 971 | -2. 76382 | 0. 00571294  |
| <i>Il2rg</i>    | 2. 79915 | TCONS_00087854 | NM_080889      | chrX:72017854-72021565    | rn_0d | rn_7d | OK | 0. 9788  | 6. 81277 | -3. 06691 | 0. 0021628   |
| <i>Rbp2</i>     | 2. 79983 | TCONS_00078738 | NM_012640      | chr8:105949254-105969564  | rn_0d | rn_7d | OK | 0. 12193 | 0. 84905 | -1. 9725  | 0. 0485522   |
| <i>Smpd13a</i>  | 2. 82169 | TCONS_00049194 | NM_001005539   | chr20:42510560-42532381   | rn_0d | rn_7d | OK | 27. 6203 | 195. 273 | -4. 6566  | 3. 21E-06    |
| <i>Kif22</i>    | 2. 82218 | TCONS_00003921 | NM_001009645   | chr1:205440606-205467625  | rn_0d | rn_7d | OK | 1. 41957 | 10. 0397 | -3. 30111 | 0. 000963017 |
| <i>Ttc7a</i>    | 2. 82266 | TCONS_00068852 | NM_001100756   | chr6:20900465-21002088    | rn_0d | rn_7d | OK | 1. 13089 | 8. 00064 | -2. 67102 | 0. 00756219  |
| <i>Tlr9</i>     | 2. 82451 | TCONS_00078780 | NM_198131      | chr8:114279022-114283069  | rn_0d | rn_7d | OK | 0. 2213  | 1. 56761 | -3. 02684 | 0. 00247121  |
| <i>B3gnt7</i>   | 2. 8256  | TCONS_00083813 | NM_001012134   | chr9:93055877-93059829    | rn_0d | rn_7d | OK | 1. 26414 | 8. 9616  | -3. 11497 | 0. 00183966  |
| <i>Fam38a</i>   | 2. 82661 | TCONS_00040887 | NM_001077200   | chr19:66009916-66075869   | rn_0d | rn_7d | OK | 1. 31591 | 9. 33511 | -2. 8449  | 0. 00444255  |
| <i>Cyp2d1</i>   | 2. 82738 | TCONS_00074594 | NM_153313      | chr7:123601167-123623719  | rn_0d | rn_7d | OK | 1. 61399 | 11. 4558 | -2. 787   | 0. 00531984  |
| <i>Tgfb1</i>    | 2. 83099 | TCONS_00063357 | NM_012775      | chr5:67570325-67639227    | rn_0d | rn_7d | OK | 10. 5976 | 75. 4084 | -4. 05389 | 5. 04E-05    |

|                 |          |                |                |                           |       |       |    |         |         |          |             |
|-----------------|----------|----------------|----------------|---------------------------|-------|-------|----|---------|---------|----------|-------------|
| <i>Col3a1</i>   | 2. 83454 | TCONS_00083536 | NM_032085      | chr9:51689491-51725418    | rn_0d | rn_7d | OK | 42.0785 | 300.152 | -4.43975 | 9.01E-06    |
| <i>Gpr84</i>    | 2. 83821 | TCONS_00074814 | NM_001109509   | chr7:142714631-142716944  | rn_0d | rn_7d | OK | 1.63982 | 11.7269 | -2.8809  | 0.00396536  |
| <i>Cnr2</i>     | 2. 84563 | TCONS_00063914 | NM_001164142   | chr5:158006693-158033101  | rn_0d | rn_7d | OK | 0.79203 | 5.69328 | -3.37039 | 0.000750621 |
| <i>Ltc4s</i>    | 2. 84849 | TCONS_00013550 | NM_053639      | chr10:35498201-35500251   | rn_0d | rn_7d | OK | 2.03377 | 14.6481 | -2.13823 | 0.0324982   |
| <i>Echdc3</i>   | 2. 8528  | TCONS_00035391 | NM_001101010   | chr17:77652352-77675480   | rn_0d | rn_7d | OK | 0.21151 | 1.52792 | -2.60496 | 0.00918843  |
| <i>Pdlim7</i>   | 2. 85783 | TCONS_00035049 | NM_173125      | chr17:11762072-11777443   | rn_0d | rn_7d | OK | 3.38683 | 24.5519 | -2.22718 | 0.0259352   |
| <i>Ankrd1</i>   | 2. 86148 | TCONS_00002114 | NM_013220      | chr1:262028001-262046691  | rn_0d | rn_7d | OK | 0.06307 | 0.45835 | -2.0965  | 0.0360375   |
| <i>Fn1</i>      | 2. 86899 | TCONS_00084394 | NM_019143      | chr9:78674306-78743650    | rn_0d | rn_7d | OK | 5.73283 | 41.8815 | -2.74381 | 0.00607307  |
| <i>LOC68653</i> | 2. 87743 | TCONS_00079541 | NM_001126300   | chr8:62722821-62725067    | rn_0d | rn_7d | OK | 16.4731 | 121.051 | -4.63226 | 3.62E-06    |
| <i>Batf</i>     | 2. 88892 | TCONS_00069309 | NM_001106748   | chr6:118868533-118890817  | rn_0d | rn_7d | OK | 0.4034  | 2.98804 | -2.8921  | 0.00382676  |
| <i>Kcnk6</i>    | 2. 88906 | TCONS_00002954 | NM_053806      | chr1:88347072-88355439    | rn_0d | rn_7d | OK | 0.6608  | 4.89511 | -3.24506 | 0.00117425  |
| <i>Kcnk6</i>    | 2. 88906 | TCONS_00002981 | NM_053806_dup1 | chr1:89343863-89352036    | rn_0d | rn_7d | OK | 0.6608  | 4.89511 | -3.24506 | 0.00117425  |
| <i>Jak3</i>     | 2. 89532 | TCONS_00032543 | NM_012855      | chr16:19967319-19981129   | rn_0d | rn_7d | OK | 1.0205  | 7.5926  | -2.58439 | 0.00975506  |
| <i>Mis18a</i>   | 2. 90122 | TCONS_00019043 | NM_001127523   | chr11:34491727-34504737   | rn_0d | rn_7d | OK | 0.40829 | 3.05014 | -2.84159 | 0.00448898  |
| <i>Slc28a2</i>  | 2. 90509 | TCONS_00051949 | NM_031664      | chr3:120896533-121186281  | rn_0d | rn_7d | OK | 1.04955 | 7.8618  | -2.32296 | 0.0201815   |
| <i>Eif4ebp1</i> | 2. 90754 | TCONS_00033218 | NM_053857      | chr16:68580262-68593808   | rn_0d | rn_7d | OK | 4.60476 | 34.5512 | -3.78283 | 0.000155054 |
| <i>Rnaset2</i>  | 2. 91772 | TCONS_00000238 | NM_001106210   | chr1:54416537-54442344    | rn_0d | rn_7d | OK | 35.7693 | 270.29  | -4.14416 | 3.41E-05    |
| <i>Lrrc17</i>   | 2. 92295 | TCONS_00058963 | NM_001025155   | chr4:10021507-10170201    | rn_0d | rn_7d | OK | 0.5001  | 3.79274 | -3.11713 | 0.00182623  |
| <i>Birc5</i>    | 2. 93391 | TCONS_00013157 | NM_022274      | chr10:106494774-106503096 | rn_0d | rn_7d | OK | 1.47657 | 11.2837 | -3.41119 | 0.000646803 |
| <i>Col1a1</i>   | 2. 94303 | TCONS_00012759 | NM_053304      | chr10:82563433-82580364   | rn_0d | rn_7d | OK | 33.9151 | 260.814 | -4.66855 | 3.03E-06    |
| <i>Vim</i>      | 2. 94698 | TCONS_00035419 | NM_031140      | chr17:82500658-82509383   | rn_0d | rn_7d | OK | 101.712 | 784.336 | -3.94133 | 8.10E-05    |
| <i>Abcc3</i>    | 2. 95499 | TCONS_00014136 | NM_080581      | chr10:81879486-81938207   | rn_0d | rn_7d | OK | 0.43255 | 3.35414 | -2.06708 | 0.0387271   |
| <i>Shc1</i>     | 2. 95593 | TCONS_00043263 | NM_001164060   | chr2:208159785-208171348  | rn_0d | rn_7d | OK | 3.21834 | 24.9722 | -3.16183 | 0.00156778  |
| <i>Plala</i>    | 2. 95788 | TCONS_00019198 | NM_138882      | chr11:67157657-67203665   | rn_0d | rn_7d | OK | 2.15651 | 16.7557 | -3.57609 | 0.000348765 |
| <i>Rbp1</i>     | 2. 95899 | TCONS_00078737 | NM_012733      | chr8:105891029-105912684  | rn_0d | rn_7d | OK | 18.4149 | 143.19  | -4.13683 | 3.52E-05    |
| <i>Tspo</i>     | 2. 96038 | TCONS_00073523 | NM_012515      | chr7:124449360-124459090  | rn_0d | rn_7d | OK | 9.55672 | 74.3825 | -4.06677 | 4.77E-05    |
| <i>Cxcr4</i>    | 2. 97314 | TCONS_00024457 | NM_022205      | chr13:50394127-50398032   | rn_0d | rn_7d | OK | 3.386   | 26.5883 | -4.02476 | 5.70E-05    |
| <i>Fes</i>      | 2. 97319 | TCONS_00003372 | NM_001108488   | chr1:143127097-143136513  | rn_0d | rn_7d | OK | 1.01633 | 7.98094 | -2.78773 | 0.00530783  |
| <i>Pltp</i>     | 2. 97405 | TCONS_00053712 | NM_001168543   | chr3:167481586-167507385  | rn_0d | rn_7d | OK | 26.4576 | 207.887 | -2.09403 | 0.0362572   |
| <i>Tec</i>      | 2. 98323 | TCONS_00026857 | NM_053432      | chr14:37729489-37838226   | rn_0d | rn_7d | OK | 1.27419 | 10.0757 | -3.39168 | 0.000694663 |
| <i>Pon3</i>     | 2. 98542 | TCONS_00059038 | NM_001004086   | chr4:30218887-30245611    | rn_0d | rn_7d | OK | 0.70699 | 5.59902 | -2.15572 | 0.0311056   |
| <i>Bin2</i>     | 2. 9927  | TCONS_00074762 | NM_001012223   | chr7:140078977-140105557  | rn_0d | rn_7d | OK | 3.84448 | 30.6005 | -3.48279 | 0.000496215 |
| <i>Il6r</i>     | 2. 99669 | TCONS_00044396 | NM_017020      | chr2:208629065-208677779  | rn_0d | rn_7d | OK | 2.14112 | 17.0897 | -4.32095 | 1.55E-05    |
| <i>Tgif1</i>    | 2. 99945 | TCONS_00084580 | NM_001015020   | chr9:118636333-118646034  | rn_0d | rn_7d | OK | 0.84882 | 6.788   | -1.98692 | 0.0469316   |
| <i>Rab7b</i>    | 2. 99954 | TCONS_00023940 | NM_001109328   | chr13:53528327-53554522   | rn_0d | rn_7d | OK | 3.63342 | 29.0581 | -2.90554 | 0.00366622  |
| <i>Tspan11</i>  | 3. 00445 | TCONS_00059757 | NM_001024262   | chr4:231093028-231159358  | rn_0d | rn_7d | OK | 0.66385 | 5.32723 | -2.42774 | 0.0151932   |
| <i>Psm8</i>     | 3. 00504 | TCONS_00048834 | NM_080767      | chr20:6070356-6073320     | rn_0d | rn_7d | OK | 6.16179 | 49.4668 | -4.15938 | 3.19E-05    |
| <i>Lgals3bp</i> | 3. 00758 | TCONS_00014550 | NM_139096      | chr10:107050327-107059685 | rn_0d | rn_7d | OK | 13.3136 | 107.071 | -4.32439 | 1.53E-05    |
| <i>Slc4a1</i>   | 3. 01395 | TCONS_00014344 | NM_012651      | chr10:90084738-90101181   | rn_0d | rn_7d | OK | 0.0728  | 0.58808 | -2.91516 | 0.00355503  |
| <i>Plin2</i>    | 3. 01843 | TCONS_00064582 | NM_001007144   | chr5:108973077-108999219  | rn_0d | rn_7d | OK | 8.11028 | 65.7161 | -3.14383 | 0.00166753  |
| <i>Angpt4</i>   | 3. 01902 | TCONS_00052178 | NM_001106526   | chr3:153772189-153806972  | rn_0d | rn_7d | OK | 0.35906 | 2.91061 | -2.88982 | 0.00385466  |
| <i>A2m</i>      | 3. 02178 | TCONS_00058697 | NM_012488_dup1 | chr4:221393232-221442945  | rn_0d | rn_7d | OK | 11.493  | 93.3423 | -5.03989 | 4.66E-07    |
| <i>Aif1</i>     | 3. 02678 | TCONS_00049403 | NM_017196      | chr20:7234608-7236508     | rn_0d | rn_7d | OK | 29.2503 | 238.386 | -4.64249 | 3.44E-06    |
| <i>Clic1</i>    | 3. 03875 | TCONS_00048883 | NM_001002807   | chr20:7113248-7122093     | rn_0d | rn_7d | OK | 15.3568 | 126.199 | -4.34083 | 1.42E-05    |
| <i>Fcr1b</i>    | 3. 0412  | TCONS_00024749 | NM_001191931   | chr13:93898240-93903745   | rn_0d | rn_7d | OK | 0.14121 | 1.16243 | -2.56538 | 0.0103063   |



|                 |         |                |                   |                           |       |       |    |         |         |          |             |
|-----------------|---------|----------------|-------------------|---------------------------|-------|-------|----|---------|---------|----------|-------------|
| <i>Tnfrif6</i>  | 3.04642 | TCONS_00051420 | NM_053382         | chr3:42649265-42663190    | rn_0d | rn_7d | OK | 4.29334 | 35.4697 | -4.09541 | 4.21E-05    |
| <i>Cebpd</i>    | 3.05052 | TCONS_00018984 | NM_013154         | chr11:92069757-92070896   | rn_0d | rn_7d | OK | 4.42805 | 36.6869 | -4.04098 | 5.32E-05    |
| <i>Cdc20</i>    | 3.06947 | TCONS_00064759 | NM_171993         | chr5:141050191-141054395  | rn_0d | rn_7d | OK | 1.09609 | 9.20133 | -3.78331 | 0.000154757 |
| <i>Dnajc22</i>  | 3.07743 | TCONS_00087420 | NM_001014204      | chrX:115286779-115291902  | rn_0d | rn_7d | OK | 0.59757 | 5.04415 | -3.17855 | 0.00148012  |
| <i>Rhod</i>     | 3.07757 | TCONS_00004183 | NM_001106323      | chr1:226536282-226550218  | rn_0d | rn_7d | OK | 0.15404 | 1.30035 | -2.72457 | 0.00643847  |
| <i>Rrm2</i>     | 3.0822  | TCONS_00069037 | NM_001025740      | chr6:60715754-60762351    | rn_0d | rn_7d | OK | 2.68193 | 22.7133 | -2.92664 | 0.00342651  |
| <i>Cc17</i>     | 3.0977  | TCONS_00012641 | NM_001007612      | chr10:69058108-69059959   | rn_0d | rn_7d | OK | 0.61557 | 5.26961 | -3.15879 | 0.00158426  |
| <i>Eme1</i>     | 3.09784 | TCONS_00014154 | NM_001105830      | chr10:82185899-82191905   | rn_0d | rn_7d | OK | 0.09594 | 0.82141 | -2.73979 | 0.00614782  |
| <i>C1cf1</i>    | 3.10355 | TCONS_00001795 | NM_207615         | chr1:226338539-226342119  | rn_0d | rn_7d | OK | 0.24629 | 2.11696 | -2.84406 | 0.0044543   |
| <i>Mrc1</i>     | 3.11493 | TCONS_00035421 | NM_001106123      | chr17:83099418-83180716   | rn_0d | rn_7d | OK | 0.62913 | 5.4504  | -2.35928 | 0.0183103   |
| <i>Abi3</i>     | 3.11598 | TCONS_00014169 | NM_001013118      | chr10:83448187-83459298   | rn_0d | rn_7d | OK | 1.10067 | 9.54245 | -2.7157  | 0.00661353  |
| <i>A2m</i>      | 3.11808 | TCONS_00058698 | NM_012488         | chr4:221506286-221556157  | rn_0d | rn_7d | OK | 11.5038 | 99.8798 | -5.18783 | 2.13E-07    |
| <i>I110ra</i>   | 3.12568 | TCONS_00079400 | NM_057193         | chr8:48186337-48200357    | rn_0d | rn_7d | OK | 0.96376 | 8.41186 | -2.66806 | 0.007629    |
| <i>Esm1</i>     | 3.12607 | TCONS_00042745 | NM_022604         | chr2:64137198-64145937    | rn_0d | rn_7d | OK | 2.18653 | 19.0896 | -4.20233 | 2.64E-05    |
| <i>Mrgprx3</i>  | 3.12805 | TCONS_00003229 | NM_145787         | chr1:104361825-104387719  | rn_0d | rn_7d | OK | 0.47165 | 4.12342 | -2.84812 | 0.00439787  |
| <i>Slc17a9</i>  | 3.13139 | TCONS_00052456 | NM_001108613      | chr3:179929393-179947616  | rn_0d | rn_7d | OK | 0.33162 | 2.9059  | -2.50751 | 0.0121586   |
| <i>Maff</i>     | 3.13501 | TCONS_00073461 | NM_001130573      | chr7:120572278-120585142  | rn_0d | rn_7d | OK | 1.07823 | 9.47199 | -3.34016 | 0.000837301 |
| <i>Amdhd2</i>   | 3.13751 | TCONS_00013354 | NM_001024990      | chr10:13344148-13352861   | rn_0d | rn_7d | OK | 4.29517 | 37.7976 | -3.82917 | 0.000128577 |
| <i>Lcn2</i>     | 3.14105 | TCONS_00052712 | NM_130741         | chr3:16763058-16766404    | rn_0d | rn_7d | OK | 2.16627 | 19.11   | -3.81281 | 0.000137396 |
| <i>RT1-DMb</i>  | 3.14198 | TCONS_00049406 | NM_198740_dup1    | chr20:7288113-7295351     | rn_0d | rn_7d | OK | 5.33063 | 47.0555 | -4.40724 | 1.05E-05    |
| <i>RT1-DMb</i>  | 3.14659 | TCONS_00048832 | NM_198740         | chr20:6025148-6032386     | rn_0d | rn_7d | OK | 5.32977 | 47.1984 | -4.41426 | 1.01E-05    |
| <i>C1qtnf6</i>  | 3.15371 | TCONS_00074513 | NM_001034932      | chr7:119734787-119741354  | rn_0d | rn_7d | OK | 1.13102 | 10.0654 | -3.34546 | 0.000821474 |
| <i>Aldh112</i>  | 3.16312 | TCONS_00073051 | NM_001191778      | chr7:26506320-26555273    | rn_0d | rn_7d | OK | 0.17312 | 1.5507  | -2.28322 | 0.0224177   |
| <i>Steap1</i>   | 3.17197 | TCONS_00057938 | NM_001106629      | chr4:25343974-25354493    | rn_0d | rn_7d | OK | 0.28581 | 2.57596 | -2.63771 | 0.00834689  |
| <i>Lyn</i>      | 3.17408 | TCONS_00063167 | NM_030857         | chr5:21307093-21423261    | rn_0d | rn_7d | OK | 1.4868  | 13.4198 | -2.43043 | 0.0150809   |
| <i>Cp</i>       | 3.176   | TCONS_00042940 | NM_012532         | chr2:124467561-124551506  | rn_0d | rn_7d | OK | 3.26365 | 29.4967 | -2.32488 | 0.0200782   |
| <i>Slc16a3</i>  | 3.20177 | TCONS_00013226 | NM_030834         | chr10:109727314-109735890 | rn_0d | rn_7d | OK | 0.47762 | 4.39448 | -3.59742 | 0.000321388 |
| <i>Sash3</i>    | 3.20709 | TCONS_00087506 | NM_001134992      | chrX:135052968-135067691  | rn_0d | rn_7d | OK | 0.74142 | 6.84691 | -3.52639 | 0.000421265 |
| <i>Ppic</i>     | 3.20967 | TCONS_00038358 | NM_001004215      | chr18:47585433-47598040   | rn_0d | rn_7d | OK | 5.19425 | 48.0541 | -4.50693 | 6.58E-06    |
| <i>Serping1</i> | 3.21222 | TCONS_00052995 | NM_199093         | chr3:78681816-78691634    | rn_0d | rn_7d | OK | 7.19195 | 66.6531 | -3.78828 | 0.000151692 |
| <i>Mboat1</i>   | 3.21793 | TCONS_00035679 | NM_001109120      | chr17:37374237-37486374   | rn_0d | rn_7d | OK | 1.01858 | 9.47738 | -2.75783 | 0.00581866  |
| <i>Cd34</i>     | 3.23081 | TCONS_00024390 | NM_001107202      | chr13:118239586-118258715 | rn_0d | rn_7d | OK | 2.42765 | 22.7907 | -4.19889 | 2.68E-05    |
| <i>Gusb</i>     | 3.23139 | TCONS_00021318 | NM_017015         | chr12:32139338-32152883   | rn_0d | rn_7d | OK | 3.4874  | 32.7528 | -4.06696 | 4.76E-05    |
| <i>Mx1</i>      | 3.23255 | TCONS_00019097 | NM_001271060      | chr11:41398736-41424277   | rn_0d | rn_7d | OK | 2.37346 | 22.3088 | -3.59666 | 0.000322332 |
| <i>Cd34</i>     | 3.23327 | TCONS_00024395 | NM_001107202_dup1 | chr13:118532087-118551216 | rn_0d | rn_7d | OK | 2.42765 | 22.8295 | -4.20253 | 2.64E-05    |
| <i>Itgb7</i>    | 3.2346  | TCONS_00074794 | NM_013171         | chr7:141618019-141635053  | rn_0d | rn_7d | OK | 0.04653 | 0.43799 | -2.1235  | 0.0337124   |
| <i>Ly86</i>     | 3.2384  | TCONS_00035652 | NM_001106128      | chr17:30007744-30080876   | rn_0d | rn_7d | OK | 3.44836 | 32.5439 | -4.24192 | 2.22E-05    |
| <i>Aspg</i>     | 3.26672 | TCONS_00069528 | NM_144750         | chr6:145692021-145711786  | rn_0d | rn_7d | OK | 0.73788 | 7.10173 | -2.64342 | 0.00820729  |
| <i>Tmem176a</i> | 3.28887 | TCONS_00058246 | NM_001039008      | chr4:143138366-143150058  | rn_0d | rn_7d | OK | 31.1203 | 304.153 | -2.54138 | 0.0110416   |
| <i>Efemp2</i>   | 3.29015 | TCONS_00001832 | NM_001277341      | chr1:227783414-227790741  | rn_0d | rn_7d | OK | 4.59076 | 44.9076 | -3.4004  | 0.000672881 |
| <i>Rhoh</i>     | 3.29502 | TCONS_00027417 | NM_001013430      | chr14:43781205-43836120   | rn_0d | rn_7d | OK | 0.29621 | 2.90739 | -3.04846 | 0.00230015  |
| <i>Lox11</i>    | 3.2981  | TCONS_00079543 | NM_001012125      | chr8:62843788-62868157    | rn_0d | rn_7d | OK | 3.09072 | 30.4009 | -4.28282 | 1.85E-05    |
| <i>Thbs2</i>    | 3.2998  | TCONS_00002557 | NM_001169138      | chr1:57842345-57871988    | rn_0d | rn_7d | OK | 3.55795 | 35.0379 | -3.88041 | 0.000104279 |
| <i>Tmem86a</i>  | 3.30512 | TCONS_00000862 | NM_001135016      | chr1:104238666-104243017  | rn_0d | rn_7d | OK | 6.65283 | 65.7579 | -4.31036 | 1.63E-05    |
| <i>Ifitm2</i>   | 3.30754 | TCONS_00004061 | NM_030833         | chr1:220671381-220672562  | rn_0d | rn_7d | OK | 23.6958 | 234.607 | -4.87333 | 1.10E-06    |



|                 |         |                |                |                           |       |       |    |         |         |          |             |
|-----------------|---------|----------------|----------------|---------------------------|-------|-------|----|---------|---------|----------|-------------|
| <i>Ceacam10</i> | 3.3093  | TCONS_00000555 | NM_173339      | chr1:82900923-82907200    | rn_0d | rn_7d | OK | 2.11319 | 20.9478 | -3.86703 | 0.000110168 |
| <i>Ceacam10</i> | 3.3093  | TCONS_00000576 | NM_173339_dup1 | chr1:84261180-84267457    | rn_0d | rn_7d | OK | 2.11319 | 20.9478 | -3.86703 | 0.000110168 |
| <i>Cyr61</i>    | 3.31197 | TCONS_00044734 | NM_031327      | chr2:270055953-270058912  | rn_0d | rn_7d | OK | 2.82616 | 28.0673 | -4.55998 | 5.12E-06    |
| <i>Ifi47</i>    | 3.31493 | TCONS_00012071 | NM_172019      | chr10:34059617-34068963   | rn_0d | rn_7d | OK | 2.28598 | 22.7491 | -4.27596 | 1.90E-05    |
| <i>Sectm1b</i>  | 3.32889 | TCONS_00014617 | NM_199082      | chr10:109838187-109846753 | rn_0d | rn_7d | OK | 0.25099 | 2.52203 | -3.16056 | 0.00157464  |
| <i>Blnk</i>     | 3.34877 | TCONS_00004537 | NM_001025767   | chr1:267630219-267697917  | rn_0d | rn_7d | OK | 4.32645 | 44.077  | -4.48838 | 7.18E-06    |
| <i>Klrb1a</i>   | 3.35484 | TCONS_00059725 | NM_001010964   | chr4:227151523-227166955  | rn_0d | rn_7d | OK | 0.04278 | 0.43765 | -1.97762 | 0.0479712   |
| <i>Slc2a5</i>   | 3.35514 | TCONS_00064063 | NM_031741      | chr5:170782620-170808467  | rn_0d | rn_7d | OK | 2.5855  | 26.4571 | -3.74233 | 0.00018232  |
| <i>S1fn3</i>    | 3.36109 | TCONS_00012657 | NM_053687      | chr10:70045720-70069233   | rn_0d | rn_7d | OK | 2.53591 | 26.057  | -4.98742 | 6.12E-07    |
| <i>Hck</i>      | 3.36752 | TCONS_00052220 | NM_013185      | chr3:154982908-155025530  | rn_0d | rn_7d | OK | 1.86591 | 19.2582 | -4.38738 | 1.15E-05    |
| <i>Dusp2</i>    | 3.3683  | TCONS_00051996 | NM_001012089   | chr3:126303198-126305375  | rn_0d | rn_7d | OK | 0.32329 | 3.3385  | -3.40257 | 0.000667552 |
| <i>Icam1</i>    | 3.36965 | TCONS_00078109 | NM_012967      | chr8:22091920-22105661    | rn_0d | rn_7d | OK | 1.17169 | 12.1109 | -3.30917 | 0.000935725 |
| <i>C1qa</i>     | 3.3722  | TCONS_00065011 | NM_001008515   | chr5:159023752-159026600  | rn_0d | rn_7d | OK | 51.3417 | 531.623 | -5.53502 | 3.11E-08    |
| <i>S1fn2</i>    | 3.3746  | TCONS_00012656 | NM_001107031   | chr10:70001018-70007628   | rn_0d | rn_7d | OK | 4.04423 | 41.9461 | -4.48854 | 7.17E-06    |
| <i>Spc25</i>    | 3.38729 | TCONS_00052905 | NM_001009654   | chr3:62049988-62063416    | rn_0d | rn_7d | OK | 0.5612  | 5.87212 | -2.79995 | 0.005111    |
| <i>Alox12</i>   | 3.38901 | TCONS_00013846 | NM_001105798   | chr10:56595325-56608169   | rn_0d | rn_7d | OK | 0.28474 | 2.98292 | -3.01518 | 0.00256823  |
| <i>P2rx4</i>    | 3.39047 | TCONS_00021926 | NM_031594      | chr12:41196777-41214804   | rn_0d | rn_7d | OK | 3.88891 | 40.7814 | -4.26144 | 2.03E-05    |
| <i>Dnase2</i>   | 3.40059 | TCONS_00040207 | NM_138539      | chr19:36998477-37001146   | rn_0d | rn_7d | OK | 8.60363 | 90.8578 | -4.99858 | 5.78E-07    |
| <i>Lcp2</i>     | 3.40623 | TCONS_00012024 | NM_130421      | chr10:18875178-18921944   | rn_0d | rn_7d | OK | 1.9967  | 21.1685 | -4.84135 | 1.29E-06    |
| <i>Olr1</i>     | 3.4068  | TCONS_00059557 | NM_133306      | chr4:211883402-211905489  | rn_0d | rn_7d | OK | 0.60086 | 6.37272 | -4.07994 | 4.50E-05    |
| <i>Ptprc</i>    | 3.41336 | TCONS_00024555 | NM_001109890   | chr13:60094037-60205338   | rn_0d | rn_7d | OK | 1.57108 | 16.7386 | -4.18864 | 2.81E-05    |
| <i>Lgals3</i>   | 3.41596 | TCONS_00029803 | NM_031832      | chr15:28094343-28106279   | rn_0d | rn_7d | OK | 43.3754 | 462.966 | -5.55024 | 2.85E-08    |
| <i>Cd14</i>     | 3.42136 | TCONS_00038293 | NM_021744      | chr18:29265350-29266946   | rn_0d | rn_7d | OK | 2.33092 | 24.9723 | -4.52568 | 6.02E-06    |
| <i>Slc39a4</i>  | 3.42873 | TCONS_00074468 | NM_001077669   | chr7:117663812-117668013  | rn_0d | rn_7d | OK | 0.16041 | 1.72733 | -2.23718 | 0.0252746   |
| <i>Tgfb1</i>    | 3.44693 | TCONS_00000575 | NM_021578      | chr1:83741412-83758472    | rn_0d | rn_7d | OK | 4.44053 | 48.4244 | -4.0609  | 4.89E-05    |
| <i>Capg</i>     | 3.45266 | TCONS_00058391 | NM_001013086   | chr4:165172598-165189840  | rn_0d | rn_7d | OK | 2.44214 | 26.7377 | -2.52792 | 0.0114739   |
| <i>Fgd2</i>     | 3.46984 | TCONS_00048957 | NM_001107617   | chr20:9212057-9228716     | rn_0d | rn_7d | OK | 1.21433 | 13.4543 | -3.81135 | 0.000138208 |
| <i>Op1ah</i>    | 3.49587 | TCONS_00074456 | NM_053904      | chr7:117339711-117355490  | rn_0d | rn_7d | OK | 2.52795 | 28.5187 | -3.06139 | 0.00220311  |
| <i>S100a3</i>   | 3.49947 | TCONS_00043303 | NM_053681      | chr2:209407917-209430124  | rn_0d | rn_7d | OK | 1.34533 | 15.2151 | -1.99091 | 0.0464905   |
| <i>Arhgap9</i>  | 3.50752 | TCONS_00073239 | NM_001012198   | chr7:70787048-70807343    | rn_0d | rn_7d | OK | 0.86995 | 9.89378 | -2.00136 | 0.0453541   |
| <i>Fcgr1a</i>   | 3.51198 | TCONS_00044475 | NM_001100836   | chr2:217916294-217925461  | rn_0d | rn_7d | OK | 2.1601  | 24.6424 | -3.91653 | 8.98E-05    |
| <i>Ugt1a7c</i>  | 3.516   | TCONS_00083846 | NM_130407      | chr9:94880264-94990037    | rn_0d | rn_7d | OK | 2.38606 | 27.2962 | -3.24561 | 0.00117201  |
| <i>Ctsc</i>     | 3.53144 | TCONS_00001121 | NM_017097      | chr1:158231170-158263682  | rn_0d | rn_7d | OK | 4.40659 | 50.9534 | -3.97934 | 6.91E-05    |
| <i>Was</i>      | 3.53262 | TCONS_00087033 | NM_001108248   | chrX:15938007-15946861    | rn_0d | rn_7d | OK | 1.20449 | 13.9389 | -3.90152 | 9.56E-05    |
| <i>Ptx3</i>     | 3.54454 | TCONS_00043130 | NM_001109536   | chr2:177231296-177513886  | rn_0d | rn_7d | OK | 0.3086  | 3.60081 | -2.23326 | 0.0255315   |
| <i>Tacc3</i>    | 3.55231 | TCONS_00027571 | NM_001004424   | chr14:83025668-83039461   | rn_0d | rn_7d | OK | 0.48852 | 5.73105 | -2.09193 | 0.0364446   |
| <i>Aurkb</i>    | 3.55371 | TCONS_00012347 | NM_053749      | chr10:55369233-55375203   | rn_0d | rn_7d | OK | 0.24644 | 2.89385 | -2.02796 | 0.0425645   |
| <i>Grn</i>      | 3.55583 | TCONS_00012944 | NM_017113      | chr10:90165633-90171738   | rn_0d | rn_7d | OK | 29.4315 | 346.118 | -5.76003 | 8.41E-09    |
| <i>Myb12</i>    | 3.56336 | TCONS_00052337 | NM_001106536   | chr3:165617177-165645609  | rn_0d | rn_7d | OK | 0.14292 | 1.68952 | -3.54879 | 0.000387002 |
| <i>Asf1b</i>    | 3.5701  | TCONS_00040180 | NM_001107160   | chr19:36055966-36070506   | rn_0d | rn_7d | OK | 0.39692 | 4.71422 | -3.83711 | 0.000124491 |
| <i>Siglec5</i>  | 3.57537 | TCONS_00003098 | NM_001106249   | chr1:99630869-99647931    | rn_0d | rn_7d | OK | 0.41562 | 4.95445 | -2.4951  | 0.0125923   |
| <i>Enpp3</i>    | 3.59058 | TCONS_00000088 | NM_019370      | chr1:23093115-23164281    | rn_0d | rn_7d | OK | 1.03433 | 12.4603 | -4.76112 | 1.93E-06    |
| <i>Knstrn</i>   | 3.60385 | TCONS_00051881 | NM_001004264   | chr3:117157779-117177434  | rn_0d | rn_7d | OK | 0.48808 | 5.93412 | -3.78884 | 0.000151351 |
| <i>Cxc116</i>   | 3.61308 | TCONS_00013852 | NM_001017478   | chr10:56817241-56840312   | rn_0d | rn_7d | OK | 3.2611  | 39.9032 | -4.06486 | 4.81E-05    |
| <i>Mt1a</i>     | 3.62094 | TCONS_00040584 | NM_138826      | chr19:11277132-11278149   | rn_0d | rn_7d | OK | 31.2388 | 384.332 | -5.12233 | 3.02E-07    |

|                 |          |                |                |                           |       |       |    |          |          |           |              |
|-----------------|----------|----------------|----------------|---------------------------|-------|-------|----|----------|----------|-----------|--------------|
| <i>Anxa1</i>    | 3. 62384 | TCONS_00004427 | NM_012904      | chr1:245192874-245209070  | rn_0d | rn_7d | OK | 7. 68572 | 94. 7475 | -5. 07231 | 3. 93E-07    |
| <i>Serpinb1</i> | 3. 64956 | TCONS_00023873 | NM_001107167   | chr13:32388014-32406429   | rn_0d | rn_7d | OK | 0. 04015 | 0. 50389 | -2. 64212 | 0. 00823884  |
| <i>Pla2g2d</i>  | 3. 64971 | TCONS_00063971 | NM_001013428   | chr5:160962030-160970154  | rn_0d | rn_7d | OK | 0. 37745 | 4. 73727 | -3. 08042 | 0. 00206712  |
| <i>Ssc5d</i>    | 3. 65013 | TCONS_00000419 | NM_001134545   | chr1:76074425-76092319    | rn_0d | rn_7d | OK | 0. 99393 | 12. 4783 | -2. 35096 | 0. 0187253   |
| <i>Atf3</i>     | 3. 65707 | TCONS_00024911 | NM_012912      | chr13:114411692-114468322 | rn_0d | rn_7d | OK | 1. 37507 | 17. 3465 | -4. 47856 | 7. 51E-06    |
| <i>Ctsz</i>     | 3. 65833 | TCONS_00053778 | NM_183330      | chr3:178565102-178585389  | rn_0d | rn_7d | OK | 18. 54   | 234. 088 | -4. 84131 | 1. 29E-06    |
| <i>Hpd</i>      | 3. 66009 | TCONS_00021380 | NM_017233      | chr12:40729051-40740668   | rn_0d | rn_7d | OK | 0. 13317 | 1. 68351 | -3. 27923 | 0. 00104091  |
| <i>Rac2</i>     | 3. 66899 | TCONS_00074515 | NM_001008384   | chr7:119772956-119786350  | rn_0d | rn_7d | OK | 3. 15244 | 40. 0979 | -4. 39068 | 1. 13E-05    |
| <i>Cmtm3</i>    | 3. 67888 | TCONS_00040524 | NM_001106164   | chr19:829210-836117       | rn_0d | rn_7d | OK | 1. 97952 | 25. 3519 | -4. 33441 | 1. 46E-05    |
| <i>C2</i>       | 3. 68612 | TCONS_00049368 | NM_172222      | chr20:6622138-6641139     | rn_0d | rn_7d | OK | 10. 2199 | 131. 546 | -5. 83696 | 5. 32E-09    |
| <i>Ifi30</i>    | 3. 69172 | TCONS_00032560 | NM_001030026   | chr16:20283633-20287840   | rn_0d | rn_7d | OK | 11. 5349 | 149. 05  | -5. 05329 | 4. 34E-07    |
| <i>Cd53</i>     | 3. 69623 | TCONS_00044551 | NM_012523      | chr2:228956378-229004197  | rn_0d | rn_7d | OK | 8. 08623 | 104. 815 | -5. 21061 | 1. 88E-07    |
| <i>RGD15657</i> | 3. 72141 | TCONS_00087209 | NM_001109318   | chrX:54590576-54609310    | rn_0d | rn_7d | OK | 0. 39527 | 5. 21378 | -4. 04545 | 5. 22E-05    |
| <i>Fcer1g</i>   | 3. 72492 | TCONS_00024757 | NM_001131001   | chr13:94228758-94233480   | rn_0d | rn_7d | OK | 29. 806  | 394. 108 | -5. 14797 | 2. 63E-07    |
| <i>Cd37</i>     | 3. 73607 | TCONS_00003166 | NM_017124      | chr1:102278663-102300660  | rn_0d | rn_7d | OK | 3. 15709 | 42. 0685 | -3. 03426 | 0. 00241129  |
| <i>Nlrp6</i>    | 3. 74246 | TCONS_00001678 | NM_134375      | chr1:220602487-220608648  | rn_0d | rn_7d | OK | 0. 04011 | 0. 53684 | -3. 00498 | 0. 002656    |
| <i>Nlrp6</i>    | 3. 74246 | TCONS_00001679 | NM_134375_dup1 | chr1:220611550-220617711  | rn_0d | rn_7d | OK | 0. 04011 | 0. 53684 | -3. 00498 | 0. 002656    |
| <i>Pstpip1</i>  | 3. 75135 | TCONS_00078444 | NM_001106824   | chr8:59330663-59370472    | rn_0d | rn_7d | OK | 0. 68408 | 9. 21244 | -2. 54878 | 0. 01081     |
| <i>Fcgr3a</i>   | 3. 75606 | TCONS_00024187 | NM_207603      | chr13:94025029-94035170   | rn_0d | rn_7d | OK | 3. 68212 | 49. 7492 | -4. 7129  | 2. 44E-06    |
| <i>Pyg1</i>     | 3. 7689  | TCONS_00069950 | NM_022268      | chr6:102044910-102091119  | rn_0d | rn_7d | OK | 0. 71974 | 9. 81127 | -3. 85089 | 0. 000117687 |
| <i>Fcgr2b</i>   | 3. 77058 | TCONS_00024752 | NM_175756      | chr13:93966565-93983119   | rn_0d | rn_7d | OK | 3. 25436 | 44. 4144 | -3. 63102 | 0. 000282299 |
| <i>Mlph</i>     | 3. 77165 | TCONS_00083870 | NM_001012135   | chr9:97753763-97789586    | rn_0d | rn_7d | OK | 0. 12139 | 1. 65789 | -3. 55386 | 0. 000379627 |
| <i>Lpxn</i>     | 3. 77428 | TCONS_00001990 | NM_001009649   | chr1:236792833-236827490  | rn_0d | rn_7d | OK | 1. 49788 | 20. 495  | -2. 9372  | 0. 0033119   |
| <i>Clqb</i>     | 3. 77722 | TCONS_00065008 | NM_019262      | chr5:159008942-159014492  | rn_0d | rn_7d | OK | 34. 4015 | 471. 666 | -6. 0546  | 1. 41E-09    |
| <i>Sdc1</i>     | 3. 77977 | TCONS_00068967 | NM_013026      | chr6:43667443-43689903    | rn_0d | rn_7d | OK | 0. 56    | 7. 69157 | -3. 60934 | 0. 000306983 |
| <i>Htra4</i>    | 3. 7852  | TCONS_00032760 | NM_001107321   | chr16:71438258-71451530   | rn_0d | rn_7d | OK | 0. 05746 | 0. 79212 | -3. 04328 | 0. 00234011  |
| <i>Emr1</i>     | 3. 79592 | TCONS_00084013 | NM_001007557   | chr9:8434334-8593088      | rn_0d | rn_7d | OK | 3. 51886 | 48. 8751 | -5. 61035 | 2. 02E-08    |
| <i>Gpr114</i>   | 3. 79917 | TCONS_00040560 | NM_001107410   | chr19:10491814-10510112   | rn_0d | rn_7d | OK | 0. 07245 | 1. 00856 | -2. 46663 | 0. 0136392   |
| <i>Ms1n</i>     | 3. 80217 | TCONS_00013413 | NM_031658      | chr10:14932447-14938109   | rn_0d | rn_7d | OK | 0. 49558 | 6. 91325 | -4. 46485 | 8. 01E-06    |
| <i>I11a</i>     | 3. 80549 | TCONS_00052020 | NM_017019      | chr3:128180287-128190980  | rn_0d | rn_7d | OK | 0. 0535  | 0. 74797 | -2. 34765 | 0. 0188924   |
| <i>Ccdc69</i>   | 3. 81086 | TCONS_00013616 | NM_001109031   | chr10:40231946-40257584   | rn_0d | rn_7d | OK | 0. 09612 | 1. 34892 | -2. 72027 | 0. 00652279  |
| <i>Hlx</i>      | 3. 82191 | TCONS_00024875 | NM_001077674   | chr13:107315400-107320809 | rn_0d | rn_7d | OK | 0. 40454 | 5. 72097 | -4. 2381  | 2. 25E-05    |
| <i>Cd40</i>     | 3. 82897 | TCONS_00052385 | NM_134360      | chr3:167704271-167719544  | rn_0d | rn_7d | OK | 0. 41887 | 5. 95276 | -3. 02046 | 0. 00252392  |
| <i>Ncf4</i>     | 3. 83121 | TCONS_00073424 | NM_001127304   | chr7:119473858-119490871  | rn_0d | rn_7d | OK | 0. 82584 | 11. 7545 | -4. 66636 | 3. 07E-06    |
| <i>Cyba</i>     | 3. 84288 | TCONS_00040881 | NM_024160      | chr19:65959817-65967224   | rn_0d | rn_7d | OK | 10. 2439 | 146. 99  | -5. 39708 | 6. 77E-08    |
| <i>Ube2t</i>    | 3. 84859 | TCONS_00024007 | NM_001108344   | chr13:56842244-56853343   | rn_0d | rn_7d | OK | 0. 18243 | 2. 62812 | -2. 52851 | 0. 0114547   |
| <i>Spi1</i>     | 3. 85204 | TCONS_00051736 | NM_001005892   | chr3:86616013-86647050    | rn_0d | rn_7d | OK | 2. 37079 | 34. 2352 | -3. 76246 | 0. 000168252 |
| <i>Nuf2</i>     | 3. 85233 | TCONS_00024734 | NM_001012028   | chr13:92449931-92486893   | rn_0d | rn_7d | OK | 0. 36386 | 5. 25531 | -2. 59224 | 0. 0095353   |
| <i>Dok3</i>     | 3. 85616 | TCONS_00035045 | NM_001107336   | chr17:11747758-11752826   | rn_0d | rn_7d | OK | 0. 71329 | 10. 3297 | -2. 763   | 0. 00572728  |
| <i>Epsti1</i>   | 3. 85697 | TCONS_00030075 | NM_001044257   | chr15:63762908-63865564   | rn_0d | rn_7d | OK | 1. 93416 | 28. 0257 | -5. 2416  | 1. 59E-07    |
| <i>Hc1s1</i>    | 3. 87476 | TCONS_00019212 | NM_001011898   | chr11:69828260-69850286   | rn_0d | rn_7d | OK | 2. 22107 | 32. 5824 | -5. 02043 | 5. 16E-07    |
| <i>Fam105a</i>  | 3. 876   | TCONS_00044006 | NM_001037648   | chr2:100047744-100070975  | rn_0d | rn_7d | OK | 3. 33746 | 49. 0013 | -3. 41495 | 0. 000637934 |
| <i>Mmp19</i>    | 3. 88445 | TCONS_00072814 | NM_001107159   | chr7:3187823-3195771      | rn_0d | rn_7d | OK | 0. 97095 | 14. 3395 | -3. 50565 | 0. 000455489 |
| <i>Slc2a9</i>   | 3. 94    | TCONS_00026965 | NM_001191551   | chr14:77061785-77174290   | rn_0d | rn_7d | OK | 0. 14526 | 2. 22944 | -3. 19727 | 0. 00138735  |
| <i>Dio3</i>     | 3. 94369 | TCONS_00069501 | NM_017210      | chr6:143766522-143768383  | rn_0d | rn_7d | OK | 0. 05008 | 0. 77064 | -2. 87869 | 0. 00399326  |

|                 |         |                |              |                           |       |       |    |         |         |          |             |
|-----------------|---------|----------------|--------------|---------------------------|-------|-------|----|---------|---------|----------|-------------|
| <i>Napsa</i>    | 3.95592 | TCONS_00000789 | NM_031670    | chr1:101642883-101655189  | rn_0d | rn_7d | OK | 0.24111 | 3.74171 | -2.82948 | 0.00466236  |
| <i>Ckap2</i>    | 3.97391 | TCONS_00032787 | NM_001169139 | chr16:74383669-74410206   | rn_0d | rn_7d | OK | 0.4386  | 6.89186 | -3.6856  | 0.000228164 |
| <i>Bik</i>      | 4.02193 | TCONS_00073522 | NM_053704    | chr7:124380346-124399141  | rn_0d | rn_7d | OK | 0.05348 | 0.86875 | -2.41922 | 0.0155539   |
| <i>Cdk1</i>     | 4.02272 | TCONS_00049098 | NM_019296    | chr20:22694920-22709859   | rn_0d | rn_7d | OK | 1.19249 | 19.3828 | -4.92146 | 8.59E-07    |
| <i>Lyz2</i>     | 4.02815 | TCONS_00074162 | NM_012771    | chr7:60337949-60343246    | rn_0d | rn_7d | OK | 57.2225 | 933.599 | -6.44533 | 1.15E-10    |
| <i>Piwil4</i>   | 4.02986 | TCONS_00079104 | NM_001271133 | chr8:13150609-13192599    | rn_0d | rn_7d | OK | 0.04655 | 0.76043 | -2.24574 | 0.0247207   |
| <i>Inmt</i>     | 4.05424 | TCONS_00059281 | NM_001109022 | chr4:150039150-150043447  | rn_0d | rn_7d | OK | 0.7679  | 12.757  | -4.55826 | 5.16E-06    |
| <i>Mgst2</i>    | 4.0609  | TCONS_00043071 | NM_001106430 | chr2:160171725-160202890  | rn_0d | rn_7d | OK | 0.67366 | 11.2433 | -2.28318 | 0.0224197   |
| <i>Mmp3</i>     | 4.0804  | TCONS_00078030 | NM_133523    | chr8:5680373-5701427      | rn_0d | rn_7d | OK | 0.1082  | 1.83039 | -3.24397 | 0.00117877  |
| <i>Clqc</i>     | 4.08468 | TCONS_00065009 | NM_001008524 | chr5:159017523-159020910  | rn_0d | rn_7d | OK | 19.6085 | 332.702 | -5.16508 | 2.40E-07    |
| <i>Cav3</i>     | 4.1362  | TCONS_00058573 | NM_019155    | chr4:207683201-207699176  | rn_0d | rn_7d | OK | 0.03284 | 0.57739 | -2.49323 | 0.0126588   |
| <i>Slc11a1</i>  | 4.14674 | TCONS_00083708 | NM_001031658 | chr9:81420420-81431333    | rn_0d | rn_7d | OK | 0.33052 | 5.85453 | -2.00685 | 0.0447658   |
| <i>Postn</i>    | 4.15709 | TCONS_00043084 | NM_001108550 | chr2:163331135-163362444  | rn_0d | rn_7d | OK | 1.34262 | 23.953  | -4.28623 | 1.82E-05    |
| <i>Apoc1</i>    | 4.16504 | TCONS_00002827 | NM_001109996 | chr1:81872115-81875891    | rn_0d | rn_7d | OK | 7.73646 | 138.786 | -4.94086 | 7.78E-07    |
| <i>Gngt2</i>    | 4.16523 | TCONS_00012776 | NM_001135767 | chr10:83459561-83462703   | rn_0d | rn_7d | OK | 0.86066 | 15.4415 | -2.39178 | 0.0167668   |
| <i>Hpgds</i>    | 4.18209 | TCONS_00059305 | NM_031644    | chr4:160734258-160758902  | rn_0d | rn_7d | OK | 0.36345 | 6.59745 | -4.33516 | 1.46E-05    |
| <i>Olah</i>     | 4.18812 | TCONS_00035413 | NM_022705    | chr17:80520859-80545527   | rn_0d | rn_7d | OK | 0.0278  | 0.50668 | -2.52453 | 0.0115855   |
| <i>Arhgap30</i> | 4.19683 | TCONS_00024206 | NM_001109077 | chr13:94402391-94423745   | rn_0d | rn_7d | OK | 0.22407 | 4.10917 | -2.55577 | 0.0105955   |
| <i>Hmox1</i>    | 4.24315 | TCONS_00040104 | NM_012580    | chr19:25622555-25629377   | rn_0d | rn_7d | OK | 6.31633 | 119.613 | -6.19127 | 5.97E-10    |
| <i>Fam64a</i>   | 4.26168 | TCONS_00012442 | NM_001113781 | chr10:58354689-58359531   | rn_0d | rn_7d | OK | 0.46869 | 8.99034 | -4.78027 | 1.75E-06    |
| <i>Bst1</i>     | 4.26888 | TCONS_00027482 | NM_030848    | chr14:71827039-71843340   | rn_0d | rn_7d | OK | 0.1847  | 3.56064 | -3.99781 | 6.39E-05    |
| <i>Ripk3</i>    | 4.31091 | TCONS_00030385 | NM_139342    | chr15:38358405-38390939   | rn_0d | rn_7d | OK | 0.37578 | 7.45839 | -2.0163  | 0.0437688   |
| <i>Dmrtc1c2</i> | 4.3121  | TCONS_00087292 | NM_001014222 | chrX:73522587-73529808    | rn_0d | rn_7d | OK | 0.08088 | 1.60657 | -3.50109 | 0.000463364 |
| <i>LOC49827</i> | 4.31866 | TCONS_00024790 | NM_001135992 | chr13:95687141-95697538   | rn_0d | rn_7d | OK | 3.18214 | 63.4986 | -6.06438 | 1.32E-09    |
| <i>Itgb2</i>    | 4.31984 | TCONS_00049510 | NM_001037780 | chr20:13944168-13981060   | rn_0d | rn_7d | OK | 0.8009  | 15.9948 | -2.86159 | 0.00421525  |
| <i>Atp6v0d2</i> | 4.33255 | TCONS_00064283 | NM_001011972 | chr5:38498890-38547691    | rn_0d | rn_7d | OK | 0.03238 | 0.65239 | -2.46427 | 0.0137293   |
| <i>Sifn13</i>   | 4.33256 | TCONS_00014031 | NM_001013970 | chr10:69956623-69973240   | rn_0d | rn_7d | OK | 1.1945  | 24.0666 | -3.32602 | 0.000880953 |
| <i>Acp5</i>     | 4.3655  | TCONS_00079220 | NM_001270889 | chr8:23197094-23202598    | rn_0d | rn_7d | OK | 0.38172 | 7.86843 | -2.66651 | 0.00766434  |
| <i>Rspo1</i>    | 4.37313 | TCONS_00063758 | NM_001107980 | chr5:146755087-146776423  | rn_0d | rn_7d | OK | 0.40859 | 8.46711 | -4.96848 | 6.75E-07    |
| <i>Nfe2</i>     | 4.38622 | TCONS_00074812 | NM_001012224 | chr7:142654115-142661467  | rn_0d | rn_7d | OK | 0.02553 | 0.53392 | -2.65778 | 0.00786569  |
| <i>Stxbp2</i>   | 4.39434 | TCONS_00021064 | NM_031126    | chr12:4342229-4353949     | rn_0d | rn_7d | OK | 0.39747 | 8.35847 | -2.87888 | 0.00399086  |
| <i>Gprc5a</i>   | 4.40096 | TCONS_00058826 | NM_001079890 | chr4:233105138-233123586  | rn_0d | rn_7d | OK | 0.1549  | 3.2725  | -4.24544 | 2.18E-05    |
| <i>Myo1f</i>    | 4.41632 | TCONS_00073012 | NM_001108076 | chr7:18618344-18669048    | rn_0d | rn_7d | OK | 1.48155 | 31.6346 | -6.30354 | 2.91E-10    |
| <i>Ar111</i>    | 4.45572 | TCONS_00029969 | NM_001013433 | chr15:45448922-45451424   | rn_0d | rn_7d | OK | 0.99486 | 21.8308 | -3.81822 | 0.000134419 |
| <i>Unc13d</i>   | 4.46632 | TCONS_00013073 | NM_138844    | chr10:103656551-103671443 | rn_0d | rn_7d | OK | 0.10841 | 2.39646 | -2.35701 | 0.0184226   |
| <i>Cxc11</i>    | 4.52981 | TCONS_00027311 | NM_030845    | chr14:18653031-18655163   | rn_0d | rn_7d | OK | 0.16943 | 3.91387 | -3.416   | 0.000635478 |
| <i>Clec12a</i>  | 4.53874 | TCONS_00058623 | NM_001134716 | chr4:211756067-211774947  | rn_0d | rn_7d | OK | 1.63101 | 37.91   | -3.94224 | 8.07E-05    |
| <i>Ube2c</i>    | 4.55401 | TCONS_00052376 | NM_001106542 | chr3:167422568-167424969  | rn_0d | rn_7d | OK | 0.61477 | 14.4413 | -4.68119 | 2.85E-06    |
| <i>Ncf1</i>     | 4.57198 | TCONS_00021303 | NM_053734    | chr12:27505739-27515002   | rn_0d | rn_7d | OK | 4.56313 | 108.534 | -6.0604  | 1.36E-09    |
| <i>Cenpw</i>    | 4.58026 | TCONS_00000136 | NM_001246319 | chr1:31347826-31352722    | rn_0d | rn_7d | OK | 0.19439 | 4.65016 | -4.11085 | 3.94E-05    |
| <i>MGC10564</i> | 4.58959 | TCONS_00051954 | NM_001008518 | chr3:121310710-121314264  | rn_0d | rn_7d | OK | 0.38627 | 9.30019 | -4.46272 | 8.09E-06    |
| <i>Ct1a2a</i>   | 4.59306 | TCONS_00034990 | NM_001109115 | chr17:6397332-6401233     | rn_0d | rn_7d | OK | 0.40486 | 9.77118 | -2.20538 | 0.0274271   |
| <i>Cc112</i>    | 4.59989 | TCONS_00012643 | NM_001105822 | chr10:69111875-69113426   | rn_0d | rn_7d | OK | 0.09207 | 2.23258 | -2.79502 | 0.00518969  |
| <i>Cthrc1</i>   | 4.65583 | TCONS_00074283 | NM_172333    | chr7:78271769-78282052    | rn_0d | rn_7d | OK | 1.01108 | 25.4876 | -5.50159 | 3.76E-08    |
| <i>Cc12</i>     | 4.66105 | TCONS_00012640 | NM_031530    | chr10:69047090-69048889   | rn_0d | rn_7d | OK | 0.75555 | 19.1151 | -5.0164  | 5.26E-07    |

|                 |         |                |                   |                           |       |       |    |         |         |          |             |
|-----------------|---------|----------------|-------------------|---------------------------|-------|-------|----|---------|---------|----------|-------------|
| <i>Mx1</i>      | 4.69321 | TCONS_00019101 | NM_001271059      | chr11:41398736-41424277   | rn_0d | rn_7d | OK | 0.56416 | 14.5947 | -2.36502 | 0.018029    |
| <i>Ms4a6b1</i>  | 4.72337 | TCONS_00001960 | NM_001006975      | chr1:234307344-234319170  | rn_0d | rn_7d | OK | 1.54542 | 40.8248 | -6.22821 | 4.72E-10    |
| <i>Slc7a7</i>   | 4.73303 | TCONS_00030335 | NM_031341         | chr15:36894260-36945586   | rn_0d | rn_7d | OK | 0.52494 | 13.9603 | -4.50823 | 6.54E-06    |
| <i>Csf3r</i>    | 4.79471 | TCONS_00063769 | NM_001106685      | chr5:147793515-147820326  | rn_0d | rn_7d | OK | 0.16872 | 4.68295 | -2.10927 | 0.0349213   |
| <i>Pf4</i>      | 4.8592  | TCONS_00027313 | NM_001007729      | chr14:18758102-18759063   | rn_0d | rn_7d | OK | 4.52813 | 131.427 | -3.90961 | 9.24E-05    |
| <i>Mmp13</i>    | 4.875   | TCONS_00078028 | NM_133530         | chr8:5527979-5538259      | rn_0d | rn_7d | OK | 0.01565 | 0.45922 | -2.97809 | 0.00290053  |
| <i>LOC69114</i> | 4.89746 | TCONS_00078129 | NM_001109624      | chr8:22613206-22630263    | rn_0d | rn_7d | OK | 0.37993 | 11.3237 | -5.23776 | 1.63E-07    |
| <i>Ms4a6b1</i>  | 4.90088 | TCONS_00001962 | NM_001006975_dup1 | chr1:234821271-234833097  | rn_0d | rn_7d | OK | 1.23956 | 37.0321 | -6.32538 | 2.53E-10    |
| <i>Cc13</i>     | 4.95678 | TCONS_00014042 | NM_013025         | chr10:70501118-70518302   | rn_0d | rn_7d | OK | 0.23957 | 7.44002 | -3.09879 | 0.00194312  |
| <i>Bc13</i>     | 4.97342 | TCONS_00002840 | NM_001109422      | chr1:81995864-82010428    | rn_0d | rn_7d | OK | 0.14626 | 4.59486 | -2.47055 | 0.0134906   |
| <i>Zmy6nb</i>   | 5.03298 | TCONS_00063793 | NM_001271137      | chr5:148958332-148962001  | rn_0d | rn_7d | OK | 0.28896 | 9.46047 | -2.66084 | 0.0077946   |
| <i>St14</i>     | 5.03905 | TCONS_00079256 | NM_053635         | chr8:32266157-32305925    | rn_0d | rn_7d | OK | 0.28062 | 9.22612 | -3.72994 | 0.000191525 |
| <i>LOC49827</i> | 5.07451 | TCONS_00024791 | NM_001135992_dup1 | chr13:95738131-95748528   | rn_0d | rn_7d | OK | 3.67082 | 123.692 | -7.21072 | 5.57E-13    |
| <i>Plk1</i>     | 5.10855 | TCONS_00001471 | NM_017100         | chr1:199178261-199188238  | rn_0d | rn_7d | OK | 0.14182 | 4.89298 | -2.2447  | 0.0247875   |
| <i>Slamf9</i>   | 5.17735 | TCONS_00024232 | NM_001105971      | chr13:95381995-95384776   | rn_0d | rn_7d | OK | 0.91318 | 33.0438 | -6.28012 | 3.38E-10    |
| <i>Lyc2</i>     | 5.17933 | TCONS_00073184 | NM_001128494      | chr7:60318026-60325592    | rn_0d | rn_7d | OK | 0.53627 | 19.4319 | -6.15384 | 7.56E-10    |
| <i>Kif2c</i>    | 5.20394 | TCONS_00064732 | NM_001085369      | chr5:139821000-139846591  | rn_0d | rn_7d | OK | 0.09431 | 3.47618 | -3.77039 | 0.000162994 |
| <i>Fcgr2a</i>   | 5.22857 | TCONS_00024788 | NM_053843         | chr13:95665161-95678334   | rn_0d | rn_7d | OK | 1.90948 | 71.593  | -5.10478 | 3.31E-07    |
| <i>Psca</i>     | 5.23331 | TCONS_00073361 | NM_001172106      | chr7:115995491-115997258  | rn_0d | rn_7d | OK | 0.55371 | 20.829  | -4.57331 | 4.80E-06    |
| <i>Cd3001e</i>  | 5.25035 | TCONS_00013115 | NM_001202463      | chr10:104711284-104721027 | rn_0d | rn_7d | OK | 0.76863 | 29.2569 | -4.05714 | 4.97E-05    |
| <i>Plau</i>     | 5.25387 | TCONS_00030175 | NM_013085         | chr15:3621056-3627772     | rn_0d | rn_7d | OK | 0.4139  | 15.7931 | -5.5034  | 3.73E-08    |
| <i>Apoc4</i>    | 5.35656 | TCONS_00002825 | NM_001109419      | chr1:81860927-81865186    | rn_0d | rn_7d | OK | 0.62397 | 25.5652 | -4.42489 | 9.65E-06    |
| <i>Serpine1</i> | 5.36134 | TCONS_00021257 | NM_012620         | chr12:24653384-24663763   | rn_0d | rn_7d | OK | 0.72033 | 29.6112 | -7.25995 | 3.87E-13    |
| <i>Itgad</i>    | 5.37054 | TCONS_00001567 | NM_031691         | chr1:206632106-206669617  | rn_0d | rn_7d | OK | 0.02044 | 0.84559 | -4.00608 | 6.17E-05    |
| <i>Lbp</i>      | 5.56794 | TCONS_00053652 | NM_017208         | chr3:160792718-160819979  | rn_0d | rn_7d | OK | 1.44043 | 68.3297 | -6.7343  | 1.65E-11    |
| <i>Itgal</i>    | 5.72275 | TCONS_00001527 | NM_001033998      | chr1:205742354-205780791  | rn_0d | rn_7d | OK | 0.39657 | 20.9431 | -4.4802  | 7.46E-06    |
| <i>RGD15653</i> | 5.7711  | TCONS_00021068 | NM_001134602      | chr12:4374152-4379850     | rn_0d | rn_7d | OK | 0.03539 | 1.93273 | -3.32669 | 0.00087885  |
| <i>Slpi</i>     | 5.79106 | TCONS_00053696 | NM_053372         | chr3:166921183-166983345  | rn_0d | rn_7d | OK | 0.39119 | 21.6607 | -4.87356 | 1.10E-06    |
| <i>Klra17</i>   | 5.87544 | TCONS_00059565 | NM_001172088      | chr4:212391145-212501991  | rn_0d | rn_7d | OK | 0.11044 | 6.48335 | -3.58056 | 0.000342857 |
| <i>Lag3</i>     | 5.87564 | TCONS_00059685 | NM_212513         | chr4:224443421-224451161  | rn_0d | rn_7d | OK | 0.02563 | 1.50471 | -3.63642 | 0.00027645  |
| <i>F10</i>      | 5.94632 | TCONS_00033327 | NM_017143         | chr16:81288535-81307922   | rn_0d | rn_7d | OK | 0.13733 | 8.46792 | -3.69751 | 0.000217727 |
| <i>Klra5</i>    | 5.99735 | TCONS_00059579 | NM_198746         | chr4:213842330-213991009  | rn_0d | rn_7d | OK | 0.0519  | 3.31579 | -2.89405 | 0.00380313  |
| <i>P1bd1</i>    | 6.02202 | TCONS_00059783 | NM_001013927      | chr4:234823107-234880050  | rn_0d | rn_7d | OK | 0.45513 | 29.5761 | -6.95845 | 3.44E-12    |
| <i>Cc19</i>     | 6.40118 | TCONS_00014040 | NM_001012357      | chr10:70416901-70421785   | rn_0d | rn_7d | OK | 0.03525 | 2.97917 | -3.97721 | 6.97E-05    |
| <i>Ly49si3</i>  | 6.45612 | TCONS_00059569 | NM_001009498_dup1 | chr4:212531164-213575577  | rn_0d | rn_7d | OK | 0.08669 | 7.61143 | -2.7582  | 0.00581214  |
| <i>GpnmB</i>    | 6.48049 | TCONS_00058251 | NM_133298         | chr4:143383025-143404104  | rn_0d | rn_7d | OK | 8.42541 | 752.34  | -9.08794 | 0           |
| <i>RGD15594</i> | 6.59082 | TCONS_00014466 | NM_001168285      | chr10:103216119-103364939 | rn_0d | rn_7d | OK | 0.3946  | 38.0357 | -2.58508 | 0.00973554  |
| <i>Ifitm1</i>   | 6.77588 | TCONS_00001684 | NM_001106314      | chr1:220687002-220689004  | rn_0d | rn_7d | OK | 2.43006 | 266.294 | -6.37073 | 1.88E-10    |
| <i>Ly49si3</i>  | 6.89078 | TCONS_00059568 | NM_001009498      | chr4:212531164-213575577  | rn_0d | rn_7d | OK | 0.08669 | 10.2875 | -3.03449 | 0.00240946  |
| <i>Acp5</i>     | 6.96794 | TCONS_00079219 | NM_019144         | chr8:23197094-23202598    | rn_0d | rn_7d | OK | 0.30497 | 38.1788 | -5.09915 | 3.41E-07    |
| <i>Timd2</i>    | 6.99833 | TCONS_00013530 | NM_001013855      | chr10:31564995-31609835   | rn_0d | rn_7d | OK | 0.0253  | 3.23509 | -3.07141 | 0.00213052  |
| <i>RGD15617</i> | 7.22602 | TCONS_00014464 | NM_001168284      | chr10:103216119-103364939 | rn_0d | rn_7d | OK | 0.11682 | 17.4894 | -2.23983 | 0.0251018   |
| <i>Clec7a</i>   | 7.22965 | TCONS_00059556 | NM_001173386      | chr4:211834025-211870955  | rn_0d | rn_7d | OK | 0.3468  | 52.0506 | -5.17334 | 2.30E-07    |
| <i>Cd68</i>     | 7.41613 | TCONS_00013812 | NM_001031638      | chr10:56014363-56016243   | rn_0d | rn_7d | OK | 1.57917 | 269.716 | -9.8554  | 0           |
| <i>Fcnb</i>     | 7.46543 | TCONS_00052638 | NM_053634         | chr3:11974690-11983068    | rn_0d | rn_7d | OK | 0.03462 | 6.11884 | -4.66543 | 3.08E-06    |

|              |         |                |              |                          |       |       |    |         |         |          |             |
|--------------|---------|----------------|--------------|--------------------------|-------|-------|----|---------|---------|----------|-------------|
| <i>Fcrls</i> | 8.7155  | TCONS_00044323 | NM_001107702 | chr2:205998854-206009505 | rn_0d | rn_7d | OK | 0.43664 | 183.549 | -10.9143 | 0           |
| <i>Cd8b</i>  | 9.09614 | TCONS_00058369 | NM_031539    | chr4:163945164-163980402 | rn_0d | rn_7d | OK | 0.03126 | 17.1079 | -3.31221 | 0.000925634 |
| <i>Cd8a</i>  | 9.24662 | TCONS_00058370 | NM_031538    | chr4:164017632-164021870 | rn_0d | rn_7d | OK | 0.08246 | 50.0875 | -6.67242 | 2.52E-11    |

---
